# Supplementary material
Source: PubMed Central journal article supplement (PMC5565904)

## *Supporting Information*

### **Pd-Catalyzed Hydroamination of Alkoxyallenes with Azole Heterocycles: Examples and Mechanistic Proposal**

Ivan Bernar,<sup>†</sup> Béla Fiser,<sup>‡,§</sup> Daniel Blanco-Ania,<sup>†</sup> Enrique Gómez-Bengoia<sup>\*,‡</sup> and Floris P. J. T. Rutjes<sup>\*,†</sup>

<sup>†</sup> Institute for Molecules and Materials, Radboud University, Heyendaalseweg 135, 6525 AJ Nijmegen, the Netherlands

<sup>‡</sup> Department of Organic Chemistry I, University of the Basque Country (UPV/EHU), P.O. Box 1072, 20080 Donostia-San Sebastián, Spain

<sup>§</sup> Institute of Chemistry, Faculty of Materials Science and Engineering, University of Miskolc, H-3515, Egyetemváros-Miskolc, Hungary

## **Contents**

|                                                                                                                  |           |
|------------------------------------------------------------------------------------------------------------------|-----------|
| <b>General methods.....</b>                                                                                      | <b>2</b>  |
| <b>Synthesis of allenyl ethers from propargyl derivatives .....</b>                                              | <b>3</b>  |
| <b>General procedures for the palladium-catalyzed addition of benzyloxyallene 1a to azole heterocycles .....</b> | <b>5</b>  |
| <b>Screenings of reaction conditions for enantioselective hydroamination reactions.....</b>                      | <b>11</b> |
| <b>General procedures for enantioselective palladium-catalyzed hydroamination reactions.....</b>                 | <b>12</b> |
| <b><sup>1</sup>H and <sup>13</sup>C NMR Spectra.....</b>                                                         | <b>15</b> |
| <b>Chiral HPLC chromatograms .....</b>                                                                           | <b>78</b> |
| <b>CD and HT chromatograms.....</b>                                                                              | <b>85</b> |
| <b>Crystal structure of (S)-3q.....</b>                                                                          | <b>92</b> |

## General methods

$^1\text{H}$  and  $^{13}\text{C}$  NMR spectra were recorded on a Varian Inova 400 MHz or Bruker 500 MHz spectrometer. Chemical shifts are reported in parts per million (ppm) relative to tetramethylsilane (TMS), or residual solvents as the internal standard. NMR data is presented as follows: chemical shift, multiplicity (s = singlet, d = doublet, t = triplet, dd = doublet of doublets, m = multiplet and/or multiple resonances), coupling constant in hertz (Hz), integration. All NMR signals were assigned on the basis of  $^1\text{H}$  NMR,  $^{13}\text{C}$  NMR, COSY, HSQC, HMBS and NOESY experiments. Mass spectra were recorded on an JEOL AccuTOF CS JMST100CS (ESI) mass spectrometer. Optical rotations were measured at 589 nm using a Perkin Elmer Polarimeter Model 241 MC. CD and HV spectra were recorded on Jasco J-815 CD spectrometer. Automatic flash column chromatography was performed using Biotage Isolera Spektra One, using SNAP cartridges (Biotage, 30–100  $\mu\text{m}$ , 60  $\text{\AA}$ ), 10–50 g. TLC-analysis was conducted on Silicagel F<sub>254</sub> (Merck KGaA) with detection by UV-absorption (254 nm) where applicable, and by dipping into a solution of  $\text{KMnO}_4/\text{Na}_2\text{CO}_3/\text{NaOH}$  in water followed by charring at ca. 150  $^\circ\text{C}$ . The chiral HPLC measurements were performed on a Shimadzu LC2010C Analytical HPLC system equipped with a Diacel Chiralpak OD-H or Phenomenex Lux 3u Cellulose-1 column using the stated eluents. Melting points were analyzed with a Büchi melting point B-545. IR spectra were recorded on an ATI Mattson Genesis Series FTIR spectrometer or a Bruker Tensor 27 FTIR spectrometer. DCM, THF and toluene were freshly distilled. Molecular sieves (4  $\text{\AA}$ ) were flame activated under vacuum prior to use. All inert reactions were carried out under argon atmosphere using flame-dried flasks.

## Synthesis of allenyl ethers from propargyl derivatives

Scheme 1. Synthesis of Propargyl Ethers

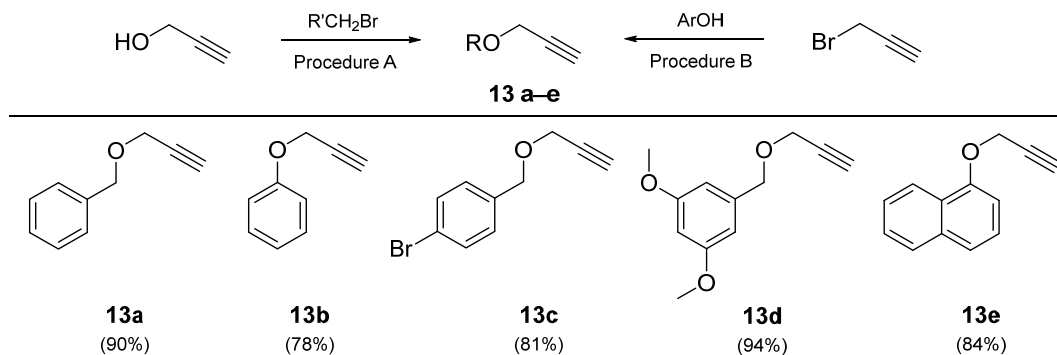

**General procedure A:**<sup>1</sup> Propargyl alcohol (1.0 g, 17.8 mmol, 1.0 equiv.) was added dropwise at 0 °C to a suspension of sodium hydride (780 mg, 60% dispersion in mineral oil, 19.6 mmol, 1.1 equiv.) in THF (40 mL) and the reaction mixture was allowed to warm up to room temperature in 1 h. Tetrabutylammonium iodide (330 mg, 0.9 mmol, 0.05 equiv.) and corresponding benzyl bromide (19.6 mmol, 1.1 equiv.) were added to the mixture successively. After completion of the reaction (TLC), the mixture was filtered over a diatomaceous-earth pad and concentrated. Obtained crude product was used directly in the next step without further purification.

**General procedure B:**<sup>2</sup> Mixture of the corresponding phenol (17.8 mmol, 1.0 equiv.) and anhydrous Cs<sub>2</sub>CO<sub>3</sub> (6.9 g, 21.4 mmol, 1.2 equiv.) in DMF (40 mL) was heated to 60 °C for half an hour under inert atmosphere. The reaction mixture was then cooled to room temperature and propargyl bromide (3.4 g, 80 wt% solution in toluene, 23.1 mmol, 1.3 equiv.) was added slowly. After completion of the reaction (TLC), the mixture was diluted with ether and washed at least 3 times with brine. Obtained crude product after solvent evaporation was used directly in the next step without further purification.

**1-(Prop-2-yn-1-yl)oxy)methyl]benzene 13a** was prepared in 90% yield through the general procedure A. <sup>1</sup>H NMR (400 MHz, CDCl<sub>3</sub>): δ = 2.47 (t, *J* = 2.4 Hz, 1 H), 4.17 (d, *J* = 2.4 Hz, 2 H), 4.61 (s, 2 H), 7.27–7.39 (m, 5 H). <sup>13</sup>C NMR (400 MHz, CDCl<sub>3</sub>): δ = 57.1, 71.4, 74.5, 79.4, 127.5, 128.1, 128.3, 137.2. These data are identical to those reported previously.<sup>3</sup>

**1-(Prop-2-yn-1-yl)oxy]benzene 13b** was prepared in 78% yield through the general procedure B. <sup>1</sup>H NMR (400 MHz, CDCl<sub>3</sub>): δ = 2.52 (t, *J* = 2.4 Hz, 1 H), 4.70 (d, *J* = 2.4 Hz, 2 H), 6.96–7.03 (m, 3 H), 7.28–7.31 (m, 2 H). <sup>13</sup>C NMR (400 MHz, CDCl<sub>3</sub>): δ = 55.6, 75.4, 78.6, 114.8, 117.8, 121.5, 129.4, 157.4. These data are identical to those reported previously.<sup>2</sup>

**1-Bromo-4-1-(prop-2-yn-1-yl)oxy)methyl]benzene 13c** was prepared through the general procedure A. The mixture residue was purified by column chromatography on silica gel (*n*-heptane/EtOAc 20:1 → 10:1) to afford the product as yellow oil in 81% yield. <sup>1</sup>H NMR (400 MHz, CDCl<sub>3</sub>): δ = 2.47 (t, *J* = 2.4 Hz, 1 H), 4.17 (d, *J* = 2.3 Hz, 2 H), 4.56 (s, 2 H), 7.21–7.25 (m, 2 H), 7.45–7.50 (m, 2 H). <sup>13</sup>C NMR (400 MHz, CDCl<sub>3</sub>): δ = 57.2, 70.7, 74.8, 79.3, 121.8, 129.6, 131.5, 136.3. IR (CHCl<sub>3</sub>): ν = 482, 630, 801, 1011, 1070, 1488, 2852, 2922 cm<sup>-1</sup>. HRMS (ESI<sup>+</sup>) calcd. for C<sub>10</sub>H<sub>9</sub>BrONa (M + Na)<sup>+</sup> 246.9729, found 246.9725.

**1,3-Dimethoxy-5-1-(prop-2-yn-1-yl)oxy)methyl]benzene 13d** was prepared in 94% yield through the general procedure A. <sup>1</sup>H NMR (400 MHz, CDCl<sub>3</sub>): δ = 2.47 (t, *J* = 2.4 Hz, 1 H), 3.79 (s, 6 H), 4.17 (d, *J* = 2.4 Hz, 2 H), 4.56 (s, 2 H), 6.40 (t, *J* = 2.3 Hz, 1 H), 6.52 (d, *J* = 2.3 Hz, 2 H). <sup>13</sup>C NMR (400 MHz, CDCl<sub>3</sub>): δ = 55.3, 57.0, 71.5, 74.6, 79.6, 100.0, 105.7, 139.6, 160.9. These data are identical to those reported previously.<sup>4</sup>

**1-1-(Prop-2-yn-1-yl)oxy]naphthalene 13e** was prepared in 84% yield through the general procedure B. <sup>1</sup>H NMR (400 MHz, CDCl<sub>3</sub>): δ = 2.54 (t, *J* = 2.4 Hz, 1 H), 4.89 (d, *J* = 2.4 Hz, 2 H), 6.94 (d, *J* = 7.6 Hz, 1 H), 7.38 (t, *J* = 8.0 Hz, 1 H), 7.45–7.52 (m, 3 H), 7.78–7.82 (m, 1 H), 8.24–8.30 (m, 1 H). <sup>13</sup>C NMR (400 MHz, CDCl<sub>3</sub>): δ = 56.1, 75.5, 78.6, 105.5, 121.2, 122.0, 125.4, 125.5, 125.6, 126.5, 127.4, 134.5, 153.3. These data are identical to those reported previously.<sup>2</sup>

<sup>1</sup> Achard T.; Lepronier A.; Gimbert Y.; Clavier H.; Giordano L.; Tenaglia A.; Buono G. *Angew. Chem. Int. Ed.* **2011**, *15*, 3552.

<sup>2</sup> Efe C.; Lykakis I. N.; Stratakis M. *Chem. Commun.* **2011**, *47*, 803.

<sup>3</sup> Ishikawa T.; Mizuta T.; Hagiwara K.; Aikawa T.; Kudo T.; Saito S. *J. Org. Chem.* **2003**, *68*, 3702.

<sup>4</sup> Lee J. W.; Kim J. H.; Kim B.-K.; Shin W. S.; Jin S.-H. *Tetrahedron* **2006**, *62*, 894.

**Scheme 2.** Synthesis of Allenyl Ethers

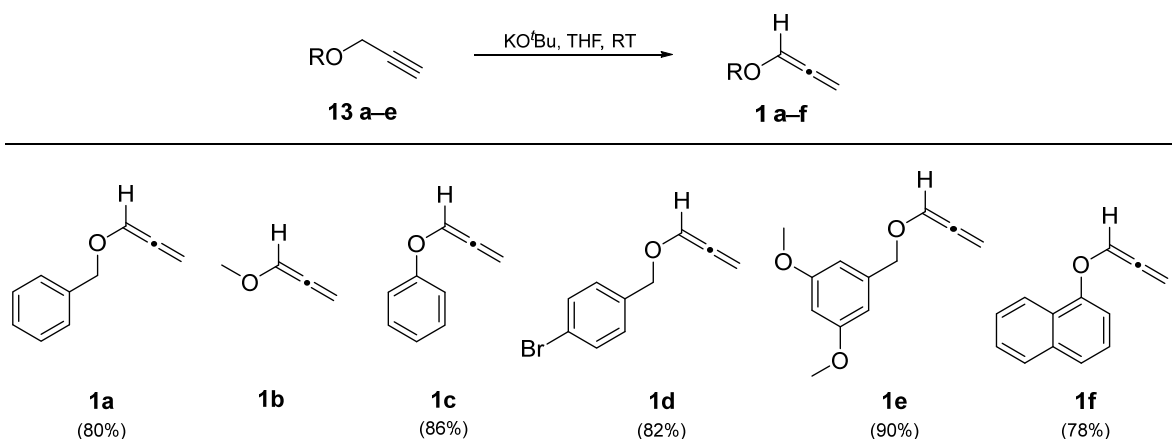

Allene substrates **1a**, **1c-f** were prepared according to the literature.<sup>5</sup> Allene **1b** was directly purchased from Sigma Aldrich.

**General procedure:** Potassium *tert*-butoxide (3.0 mmol, 0.3 equiv.) was added at room temperature to a solution of propargyl ether **13a-e** (10 mmol, 1 equiv.) in THF (25 mL). The suspension was stirred at room temperature for the appropriate time (6–12 h, TLC), then filtered through a diatomaceous-earth pad and washed with *n*-heptane. The solvent mixture was removed *in vacuo* and the crude residue was purified by column chromatography as indicated.

**[(Propa-1,2-dien-1-yl)oxy]methyl]benzene 1a.** Column chromatography (*n*-heptane/EtOAc 20:1 → 10:1; silica gel was washed with 1% NEt<sub>3</sub> before running column) afforded the product **4a** as a slightly yellow oil (80%). <sup>1</sup>H NMR (400 MHz, CDCl<sub>3</sub>): δ = 4.61 (s, 2 H), 5.48 (d, *J* = 6.0 Hz, 2 H), 6.84 (t, *J* = 5.9 Hz, 1 H), 7.28–7.38 (m, 5 H). <sup>13</sup>C NMR (400 MHz, CDCl<sub>3</sub>): δ = 70.6, 91.1, 121.6, 127.7, 127.8, 128.3, 137.3, 201.3. These data are identical to those reported previously.<sup>5</sup>

**[(Propa-1,2-dien-1-yl)oxy]benzene 1c.** Column chromatography (*n*-heptane/EtOAc 40:1 → 20:1; silica gel was washed with 1% NEt<sub>3</sub> before running column) afforded the product **4c** as a slightly yellow oil (86%). <sup>1</sup>H NMR (400 MHz, CDCl<sub>3</sub>): δ = 5.45 (d, *J* = 5.9 Hz, 2 H), 6.85 (t, *J* = 5.9 Hz, 1 H), 7.03–7.10 (m, 2 H), 7.28–7.35 (m, 3 H). <sup>13</sup>C NMR (400 MHz, CDCl<sub>3</sub>): δ = 89.5, 116.7, 122.7, 129.5, 202.8. These data are identical to those reported previously.<sup>6</sup>

**1-Bromo-4-[(propa-1,2-dien-1-yl)oxy]methyl]benzene 1d.** Column chromatography (*n*-heptane/EtOAc 20:1; silica gel was washed with 1% NEt<sub>3</sub> before running column) afforded the product **4d** as a slightly yellow oil (82%). <sup>1</sup>H NMR (400 MHz, CDCl<sub>3</sub>): δ = 4.56 (s, 2 H), 5.47 (d, *J* = 5.7 Hz, 2 H), 6.81 (t, *J* = 6.0 Hz, 1 H), 7.20–7.25 (m, 2 H), 7.44–7.51 (m, 2 H). <sup>13</sup>C NMR (400 MHz, CDCl<sub>3</sub>): δ = 69.6, 91.7, 121.5, 121.9, 129.3, 131.4, 136.6, 201.2. These data are identical to those reported previously.<sup>7</sup>

**1,3-Dimethoxy-5-[(propa-1,2-dien-1-yl)oxy]methyl]benzene 1e.** Column chromatography (*n*-heptane/EtOAc 40:1 → 20:1; silica gel was washed with 1% NEt<sub>3</sub> before running column) afforded the product **4e** as a slightly yellow oil (90%). <sup>1</sup>H NMR (400 MHz, CDCl<sub>3</sub>): δ = 3.79 (s, 6 H), 4.55 (s, 2 H), 5.48 (d, *J* = 6.0 Hz, 2 H), 6.40 (t, *J* = 2.3 Hz, 1 H), 6.51 (dt, *J* = 0.5, 2.3 Hz, 2 H), 6.83 (t, *J* = 5.9 Hz, 1 H). <sup>13</sup>C NMR (400 MHz, CDCl<sub>3</sub>): δ = 55.3, 70.5, 91.2, 100.0, 105.4, 121.5, 139.6, 160.8, 201.2. IR (CHCl<sub>3</sub>): ν = 832, 1153, 1205, 1461, 1598, 2838, 2936 cm<sup>-1</sup>. HRMS (ESI<sup>+</sup>) calcd. for C<sub>12</sub>H<sub>14</sub>O<sub>3</sub>Na (M + Na)<sup>+</sup> 229.0835, found 229.0833.

**1-[(Propa-1,2-dien-1-yl)oxy]naphthalene 1f.** Column chromatography (*n*-heptane/EtOAc 40:1 → 20:1; silica gel was washed with 1% NEt<sub>3</sub> before running column) afforded the product **4f** as a slightly yellow oil (78%). <sup>1</sup>H NMR (400 MHz, CDCl<sub>3</sub>): δ = 5.48 (d, *J* = 5.9 Hz, 2 H), 7.00 (t, *J* = 5.8 Hz, 1 H), 7.09 (d, *J* = 7.5 Hz, 1 H), 7.34–7.57 (m, 4 H), 7.76–7.85 (m, 1 H), 8.21–8.31 (m, 1 H). <sup>13</sup>C NMR (400 MHz, CDCl<sub>3</sub>): δ = 89.6, 109.5, 118.1, 121.9, 122.5, 125.5, 125.7, 126.5, 127.5, 134.6, 153.1, 203.0. These data are identical to those reported previously.<sup>8</sup>

<sup>5</sup> Helms M.; Schade W.; Pulz R.; Watanabe T.; Al-Harrasi A.; Fisera L.; Hlobilova I.; Zahn G.; Reissig H.-U. *Eur. J. Org. Chem.* **2005**, 6, 1003.

<sup>6</sup> Ocello R.; De Nisi A.; Jia M.; Yang Q.-Q.; Monari M.; Giacinto P.; Bottoni A.; Miscione G. P.; Bandini M. *Chem. Eur. J.* **2015**, 21, 18445.

<sup>7</sup> Reddy M. N.; Swamy K. C. K. *Synthesis* **2014**, 46, 1091.

<sup>8</sup> Moghaddam F.M.; Emami R. *Synth. Comm.* **1997**, 27, 4073.

## General procedures for the palladium-catalyzed addition of benzyloxyallene **1a** to azole heterocycles

**Scheme 3.** Scope of the Azole Heterocycles

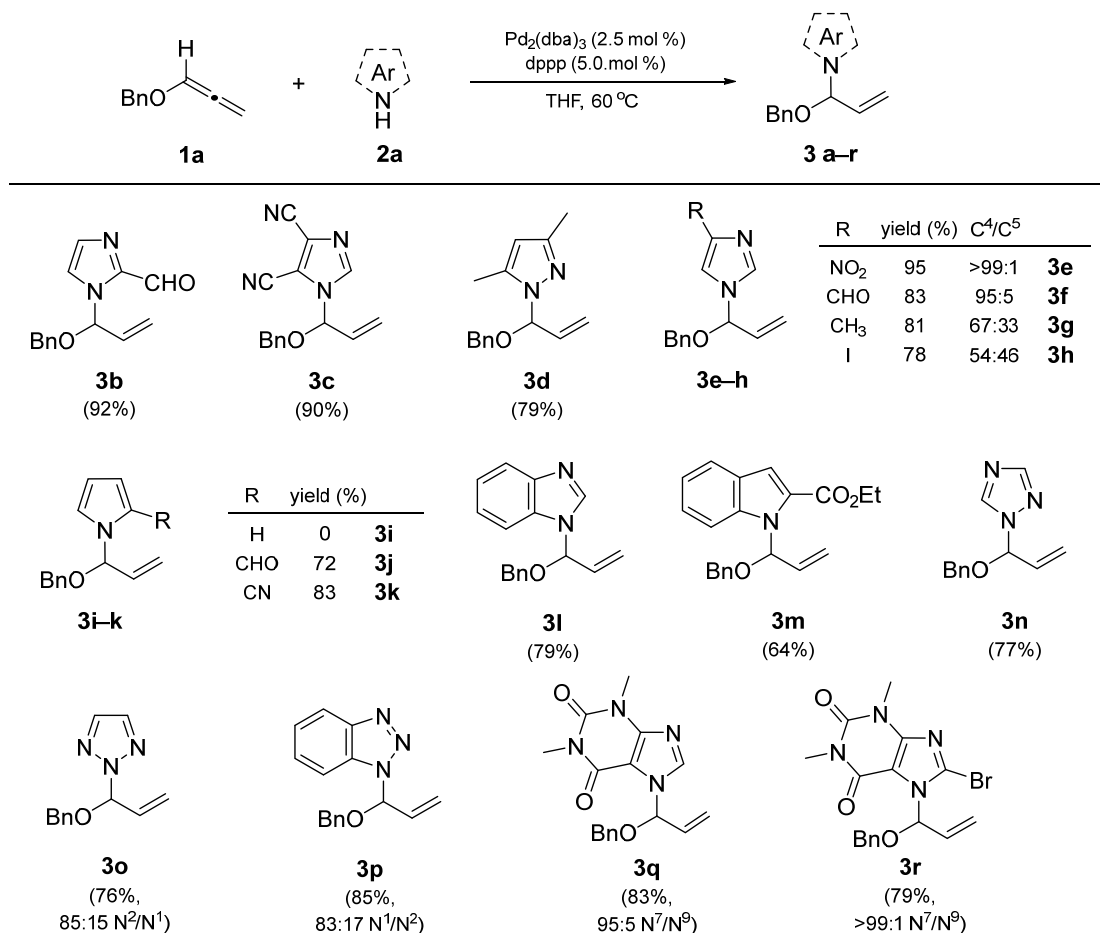

**General procedure:** The reaction was performed in a 5.0 mL Schlenk tube under Argon. Pd<sub>2</sub>(dba)<sub>3</sub> (6.9 mg, 0.0075 mmol, 0.025 equiv.) and 1,3-bis(diphenylphosphino)propane (6.2 mg, 0.015 mmol, 0.05 equiv.) were solved in dry tetrahydrofuran (3.0 mL). Azole heterocycle (0.36 mmol, 1.2 equiv.) and benzyloxyallene **1a** (43.9 mg, 0.3 mmol, 1.0 equiv.) were added and the flask was sealed. The reaction mixture was stirred at 60 °C for the appropriate time (3–18 h). After cooling down to room temperature, the solvent was removed in vacuo and the crude residue was purified by column chromatography as indicated.

**1-[1-(Benzyloxy)allyl]-1H-imidazole (3a).** Imidazole (24.5 mg, 0.36 mmol) was treated with benzyloxyallene according to the general procedure and heated for 3 h. The solvent was removed in vacuo and the crude residue was filtrated over diatomaceous-earth pad with *n*-heptane to afford the product **3a** as slightly yellow oil (60 mg, 93%).

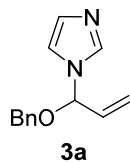

**R<sub>F</sub>** (silica gel, *n*-heptane): 0.43 (UV, KMnO<sub>4</sub>-solution). **<sup>1</sup>H NMR** (400 MHz, CDCl<sub>3</sub>): δ = 4.34 (d, *J* = 11.9 Hz, 1 H), 4.53 (d, *J* = 11.9 Hz, 1 H), 5.39 (ddd, *J* = 0.9, 1.5, 10.5 Hz, 1 H), 5.41 (ddd, *J* = 0.9, 1.6, 17.2 Hz, 1 H), 5.90 (dt, *J* = 1.5, 4.3 Hz, 1 H), 6.04 (ddd, *J* = 4.3, 10.5, 17.2 Hz, 1 H), 7.06 (t, *J* = 1.3 Hz, 1 H), 7.14 (t, *J* = 0.9 Hz, 1 H), 7.27–7.40 (m, 5 H), 7.63 (t, *J* = 1.0 Hz, 1 H). **<sup>13</sup>C NMR** (400 MHz, CDCl<sub>3</sub>): δ = 69.7, 84.3, 116.9, 127.9, 128.2, 128.6, 130.0, 134.1, 136.3. **IR** (CHCl<sub>3</sub>): ν = 700, 741, 811, 1062, 1218, 1496, 2873, 3031 cm<sup>-1</sup>. **HRMS** (ESI<sup>+</sup>) calcd. for C<sub>13</sub>H<sub>15</sub>N<sub>2</sub>O (M + H)<sup>+</sup> 215.1184, found 215.1179.

**1-[1-(Benzyloxy)allyl]-1H-imidazole-2-carbaldehyde (3b).** Reaction was conducted according to the general procedure using Pd<sub>2</sub>(dba)<sub>3</sub> (23.0 mg, 0.025 mmol, 0.025 equiv.), 1,3-bis(diphenylphosphino)propane (20.5 mg, 0.05 mmol, 0.05 equiv.), imidazole-2-carbaldehyde (115.0 mg, 1.2 mmol), benzyloxyallene (146.0 mg, 1.0 mmol), in THF (10.0 mL) and heated for 4 h. Column chromatography (*n*-heptane/EtOAc 20:1 → 4:1) afforded product **3b** as a slightly yellow oil (223.0 mg, 92%).

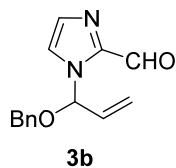

**R<sub>F</sub>** (silica gel, *n*-heptane/EtOAc = 1:1): 0.69 (UV, KMnO<sub>4</sub>-solution). **<sup>1</sup>H NMR** (400 MHz, CDCl<sub>3</sub>): δ = 4.49 (d, *J* = 11.5 Hz, 1 H), 4.54 (d, *J* = 11.5 Hz, 1 H), 5.35 (ddd, *J* = 0.9, 1.4, 10.5 Hz, 1 H), 5.40 (ddd, *J* = 0.9, 1.5, 17.2 Hz, 1 H), 5.98 (ddd, *J* = 4.5, 10.5, 17.2 Hz, 1 H), 6.98 (dt, *J* = 1.4, 4.6 Hz, 1 H), 7.24–7.28 (m, 2 H), 7.30–7.36 (m, 4 H), 7.47 (t, *J* = 1.0 Hz, 1 H), 9.83 (d, *J* = 1.0 Hz, 1 H). **<sup>13</sup>C NMR** (400 MHz, CDCl<sub>3</sub>): δ = 71.1, 84.8, 119.0, 122.7, 127.9, 128.2, 128.5, 132.4, 134.1, 136.2, 182.5. **IR** (CHCl<sub>3</sub>): ν = 700, 754, 831, 1069, 1406, 1688, 2844, 3032 cm<sup>-1</sup>. **HRMS** (ESI<sup>+</sup>) calcd. for C<sub>14</sub>H<sub>15</sub>N<sub>2</sub>O<sub>2</sub> (M + H)<sup>+</sup> 243.1134, found 243.1128.

**1-[1-(Benzyloxy)allyl]-3,5-dimethyl-1H-imidazole-4,5-dicarbonitrile (3c)**. Imidazole-4,5-dicarbonitrile (42.5 mg, 0.36 mmol) was treated with benzyloxyallene according to the general procedure and heated for 4 h. Column chromatography (*n*-heptane/EtOAc 20:1 → 4:1) afforded the product **3c** as slightly yellow oil (71.4 mg, 90%).

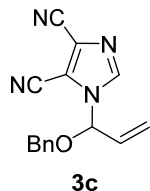

**R<sub>F</sub>** (silica gel, *n*-heptane/EtOAc = 2:1): 0.44 (UV, KMnO<sub>4</sub>-solution). **<sup>1</sup>H NMR** (400 MHz, CDCl<sub>3</sub>): δ = 4.60 (d, *J* = 11.9 Hz, 1 H), 4.68 (d, *J* = 11.9 Hz, 1 H), 5.59 (dd, *J* = 1.3, 10.3 Hz, 1 H), 5.60 (dd, *J* = 1.3, 17.2 Hz, 1 H), 5.88 (dt, *J* = 1.3, 4.9 Hz, 1 H), 6.02 (ddd, *J* = 4.9, 10.4, 17.1 Hz, 1 H), 7.24–7.28 (m, 2 H), 7.28–7.40 (m, 5 H), 7.80 (s, 1 H). **<sup>13</sup>C NMR** (400 MHz, CDCl<sub>3</sub>): δ = 72.0, 86.8, 107.6, 110.7, 111.3, 122.1, 123.8, 128.1, 128.9, 130.0, 131.6, 134.6, 139.7. **IR** (CHCl<sub>3</sub>): ν = 699, 738, 803, 1023, 1343, 1454, 1655, 2241, 2922, 3032 cm<sup>-1</sup>. **HRMS** (ESI<sup>+</sup>) calcd. for C<sub>15</sub>H<sub>13</sub>N<sub>4</sub>O (M + H)<sup>+</sup> 265.1089, found 265.1082.

**1-[1-(Benzyloxy)allyl]-3,5-dimethyl-1H-pyrazole (3d)**. 3,5-Dimethylpyrazole (34.6 mg, 0.36 mmol) was treated with benzyloxyallene according to the general procedure and heated for 4 h. Column chromatography (*n*-heptane/EtOAc 10:1 → 1:1) afforded the product **3d** as slightly yellow oil (57.4 mg, 79%).

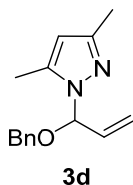

**R<sub>F</sub>** (silica gel, *n*-heptane/EtOAc = 10:1): 0.22 (UV, KMnO<sub>4</sub>-solution). **<sup>1</sup>H NMR** (400 MHz, CDCl<sub>3</sub>): δ = 2.22 (s, 3 H), 2.24 (s, 3 H), 4.42 (d, *J* = 11.9 Hz, 1 H), 4.46 (d, *J* = 12.0 Hz, 1 H), 5.34 (ddd, *J* = 1.2, 1.7, 10.5 Hz, 1 H), 5.36 (ddd, *J* = 1.2, 1.7, 17.3 Hz, 1 H), 5.86 (s, 1 H), 5.90 (dt, *J* = 1.7, 4.3 Hz, 1 H), 6.15 (ddd, *J* = 4.4, 10.6, 17.3 Hz, 1 H), 7.25–7.35 (m, 5 H). **<sup>13</sup>C NMR** (400 MHz, CDCl<sub>3</sub>): δ = 11.4, 13.5, 69.5, 88.2, 107.1, 118.2, 127.8, 127.9, 128.4, 134.3, 137.1, 139.6, 147.9. **IR** (CHCl<sub>3</sub>): ν = 699, 737, 824, 1066, 1314, 1456, 1559, 2843, 3032 cm<sup>-1</sup>. **HRMS** (ESI<sup>+</sup>) calcd. for C<sub>15</sub>H<sub>19</sub>N<sub>2</sub>O (M + H)<sup>+</sup> 243.1497, found 243.1493.

**1-[1-(Benzyloxy)allyl]-4-nitro-1H-imidazole (3ea)**. 4(5)-Nitroimidazole (40.7 mg, 0.36 mmol) was treated with benzyloxyallene according to the general procedure and heated for 4 h. Ratio C-4/C-5 > 99:1 was determined by <sup>1</sup>H NMR spectroscopy. Crude product was filtered with CH<sub>2</sub>Cl<sub>2</sub> through a diatomaceous-earth pad affording the product **3ea** as slightly yellow oil (73.9 mg, 95%).

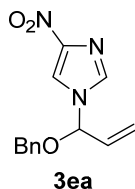

**R<sub>F</sub>** (silica gel, *n*-heptane/EtOAc = 1:1): 0.42 (UV, KMnO<sub>4</sub>-solution). **<sup>1</sup>H NMR** (400 MHz, CDCl<sub>3</sub>): δ = 4.48 (d, *J* = 12.0 Hz, 1 H), 4.64 (d, *J* = 12.0 Hz, 1 H), 5.53 (ddd, *J* = 0.8, 1.5, 10.9 Hz, 1 H), 5.56 (ddd, *J* = 0.9, 1.5, 17.2 Hz, 1 H), 5.69 (dt, *J* = 1.4, 4.6 Hz, 1 H), 6.00 (ddd, *J* = 4.6, 10.5, 17.2 Hz, 1 H), 7.27–7.32 (m, 2 H), 7.35–7.42 (m, 3 H), 7.55 (d, *J* = 1.6 Hz, 1 H), 7.84 (d, *J* = 1.6 Hz, 1 H). **<sup>13</sup>C NMR** (400 MHz, CDCl<sub>3</sub>): δ = 70.8, 85.8, 117.2, 120.8, 128.0, 128.8, 128.9, 132.7, 134.6. **IR** (CHCl<sub>3</sub>): ν = 700, 752, 824, 1070, 1276, 1340, 1491, 2856, 3029 cm<sup>-1</sup>. **HRMS** (ESI<sup>+</sup>) calcd. for C<sub>13</sub>H<sub>14</sub>N<sub>3</sub>O<sub>3</sub> (M + H)<sup>+</sup> 260.1035, found 260.1039.

sel. NOE:

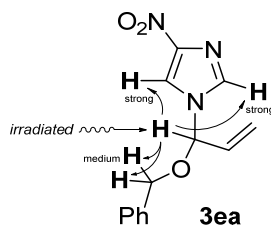

**1-[1-(Benzyloxy)allyl]-1H-imidazole-4-carbaldehyde (3fa)**. Imidazole-4(5)-carbaldehyde (34.6 mg, 0.36 mmol) was treated with benzyloxyallene according to the general procedure and heated for 3 h. Ratio C-4/C-5 = 95:5 was determined by <sup>1</sup>H NMR spectroscopy. Column chromatography (*n*-heptane/EtOAc 10:1 → 1:2) afforded the product **3fa** as slightly yellow oil (50.9 mg, 70%).

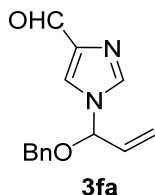

**R<sub>F</sub>** (silica gel, *n*-heptane/EtOAc = 1:1): 0.16 (UV, KMnO<sub>4</sub>-solution). **<sup>1</sup>H NMR** (400 MHz, CDCl<sub>3</sub>): δ = 4.42 (d, *J* = 11.9 Hz, 1 H), 4.59 (d, *J* = 11.9 Hz, 1 H), 5.47 (ddd, *J* = 0.7, 1.5, 10.7 Hz, 1 H), 5.49 (ddd, *J* = 0.6, 1.5, 17.2 Hz, 1 H), 5.70 (dt, *J* = 1.5, 4.5 Hz, 1 H), 6.02 (ddd, *J* = 4.5, 10.4, 17.2 Hz, 1 H), 7.26–7.42 (m, 5 H), 7.70 (d, *J* = 1.2 Hz, 1 H), 7.74 (d, *J* = 1.2 Hz, 1 H), 9.91 (s, 1 H). **<sup>13</sup>C NMR** (400 MHz, CDCl<sub>3</sub>): δ = 70.4, 85.2, 120.1, 122.5, 127.9, 128.6, 128.8, 133.2, 137.5, 186.2. **IR** (CHCl<sub>3</sub>): ν = 700, 774, 807, 1070, 1534, 1685, 2841, 3033 cm<sup>-1</sup>. **HRMS** (ESI<sup>+</sup>) calcd. for C<sub>14</sub>H<sub>15</sub>N<sub>2</sub>O<sub>2</sub> (M + H)<sup>+</sup> 243.1134, found 243.1136.

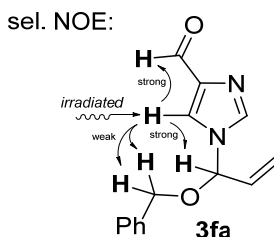

**1-[1-(Benzyloxy)allyl]-4-methyl-1H-imidazole (3ga)** and **1-[1-(benzyloxy)allyl]-5-methyl-1H-imidazole (3gb)**. 4(5)-Methylimidazole (30.0 mg, 0.36 mmol) was treated with benzyloxycarbonylallene according to the general procedure and heated for 3 h. Ratio C-4/C-5 = 67:33 was determined by <sup>1</sup>H NMR spectroscopy. Column chromatography (*n*-heptane/EtOAc 10:1 → 1:2) afforded the product as non-separable mixture of both regioisomers **3ga** and **3gb** (55.5 mg, 81%) as a slightly yellow oil.

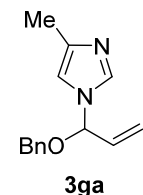

**R<sub>f</sub>** (silica gel, *n*-heptane/EtOAc = 1:2): 0.06–0.29 (UV, KMnO<sub>4</sub>-solution). The signals of main isomer are indicated with an asterisk in superscript (\*). <sup>1</sup>H NMR (400 MHz, CDCl<sub>3</sub>): δ = 2.18 (d, *J* = 1.0 Hz, 3 H)\*, 2.25 (d, *J* = 1.0 Hz, 3 H), 4.34 (d, *J* = 11.9 Hz, 1 H)\*, 4.35 (d, *J* = 11.8 Hz, 1 H), 4.52 (d, *J* = 11.9 Hz, 1 H), 4.55 (d, *J* = 11.8 Hz, 1 H), 5.29 (ddd, *J* = 0.9, 1.7, 17.2 Hz, 1 H), 5.37 (ddd, *J* = 0.9, 1.5, 10.5 Hz, 1 H)\*<sup>‡</sup>, 5.37 (ddd, *J* = 0.6, 1.5, 10.6 Hz, 1 H)\*, 5.41 (ddd, *J* = 1.0, 1.6, 17.2 Hz, 1 H)\*, 5.57 (dt, *J* = 1.5, 4.3 Hz, 1 H)\*, 5.65 (dt, *J* = 1.7, 4.1 Hz, 1 H), 6.01 (ddd, *J* = 4.4, 10.5, 17.2 Hz, 1 H)\*, 6.04 (ddd, *J* = 4.2, 10.3, 17.2 Hz, 1 H), 6.76 (dd, *J* = 1.1, 1.3 Hz, 1 H)\*, 6.83 (dd, *J* = 1.1, 1.3 Hz, 1 H), 7.27–7.39 (m, 10 H)\*, 7.55 (d, *J* = 1.3 Hz, 1 H)\*, 7.57 (d, *J* = 1.3 Hz, 1 H)\* (Overlapping of the signals) ppm. <sup>13</sup>C NMR (400 MHz, CDCl<sub>3</sub>): δ = 9.9, 13.7\*, 69.5\*, 69.6, 83.7, 84.3\*, 113.2, 118.7, 118.8\*, 127.7, 127.8\*, 127.8, 128.1\*, 128.2, 128.5\*, 128.6, 134.2\*, 134.3, 135.5\*, 136.2, 136.3\*, 139.0\*. IR (CHCl<sub>3</sub>): ν = 669, 739, 814, 1065, 1494, 2871, 3032 cm<sup>-1</sup>. HRMS (ESI<sup>+</sup>) calcd. for C<sub>14</sub>H<sub>17</sub>N<sub>2</sub>O (M + H)<sup>+</sup> 229.1341, found 229.1348.

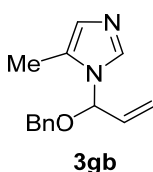

sel. NOE:

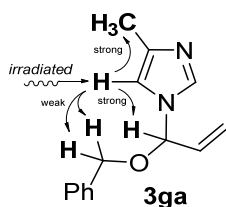

sel. NOE:

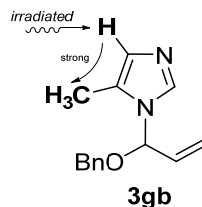

**1-[1-(Benzyloxy)allyl]-4-iodo-1H-imidazole (3ha)** and **1-[1-(benzyloxy)allyl]-5-iodo-1H-imidazole (3hb)**. 4(5)-Iodoimidazole (100 mg, 0.52 mmol) was treated with benzyloxycarbonylallene (85 mg, 0.57 mmol) according to the general procedure and heated for 3 h. C-4/C-5 > 54:46 was determined by <sup>1</sup>H NMR spectroscopy. Column chromatography (*n*-heptane/EtOAc 10:1 → 1:2) afforded the product **3ha** (70 mg, 36%) and the product **3hb** (81 mg, 42%) as a slightly yellow oil.

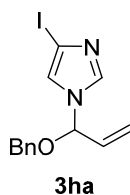

**Compound 3ha:** **R<sub>f</sub>** (silica gel, *n*-heptane/EtOAc = 1:1): 0.69 (UV, KMnO<sub>4</sub>-solution). <sup>1</sup>H NMR (400 MHz, CDCl<sub>3</sub>): δ = 4.37 (d, *J* = 12.0 Hz, 1 H), 4.56 (d, *J* = 12.0 Hz, 1 H), 5.41 (ddd, *J* = 0.8, 1.5, 10.5 Hz, 1 H), 5.44 (ddd, *J* = 0.8, 1.5, 17.2 Hz, 1 H), 5.61 (dt, *J* = 1.5, 4.3 Hz, 1 H), 5.98 (ddd, *J* = 4.3, 10.5, 17.2 Hz, 1 H), 7.14 (d, *J* = 1.4 Hz, 1 H), 7.27–7.41 (m, 5 H), 7.51 (d, *J* = 1.4 Hz, 1 H). <sup>13</sup>C NMR (400 MHz, CDCl<sub>3</sub>): 70.0, 84.6, 119.6, 122.6, 127.9, 128.4, 128.7, 133.6, 135.8, 137.7. IR (CHCl<sub>3</sub>): ν = 462, 698, 738, 803, 1072, 1209, 1454, 2873, 3027 cm<sup>-1</sup>. HRMS (ESI<sup>+</sup>) calcd. for C<sub>13</sub>H<sub>14</sub>IN<sub>2</sub>O (M + H)<sup>+</sup> 341.0151, found 341.0159.

sel. NOE:

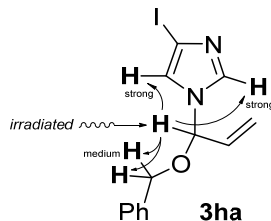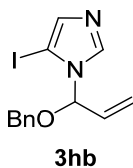

**Compound 3hb:** **R<sub>f</sub>** (silica gel, *n*-heptane/EtOAc = 1:1): 0.59 (UV, KMnO<sub>4</sub>-solution). <sup>1</sup>H NMR (400 MHz, CDCl<sub>3</sub>): δ = 4.45 (d, *J* = 11.7 Hz, 1 H), 4.59 (d, *J* = 11.7 Hz, 1 H), 5.39 (ddd, *J* = 0.7, 1.5, 17.1 Hz, 1 H), 5.42 (ddd, *J* = 0.7, 1.5, 10.6 Hz, 1 H), 5.76 (dt, *J* = 1.5, 4.5 Hz, 1 H), 5.98 (ddd, *J* = 4.4, 10.6, 17.1 Hz, 1 H), 7.28–7.40 (m, 6 H), 7.77 (s, 1 H). <sup>13</sup>C NMR (400 MHz, CDCl<sub>3</sub>): δ = 70.7, 87.8, 119.8, 128.1, 128.4, 128.7, 133.4, 135.7, 140.4. IR (CHCl<sub>3</sub>): ν = 432, 682, 804, 1062, 1254, 2871, 3033 cm<sup>-1</sup>. HRMS (ESI<sup>+</sup>) calcd. for C<sub>13</sub>H<sub>14</sub>IN<sub>2</sub>O (M + H)<sup>+</sup> 341.0151, found 341.0160.

sel. NOE:

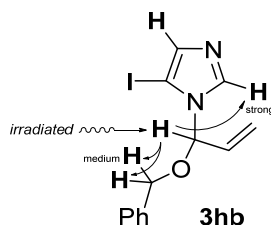

**1-[1-(Benzyloxy)allyl]-1H-pyrrole (3i) and 3,3-bis(benzyloxy)prop-1-ene (14).** Pyrrole (24.2 mg, 0.36 mmol) was treated with benzyloxyallene according to the general procedure and heated for 6 h. Column chromatography (*n*-heptane/CH<sub>2</sub>Cl<sub>2</sub> 40:1 → 10:1) afforded the product **3i** (<1 mg, trace) and the product **14** (28.2 mg, 37%) as a slightly yellow oils.

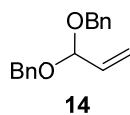

**Compound 14:** *R<sub>F</sub>* (silica gel, *n*-heptane/CH<sub>2</sub>Cl<sub>2</sub> = 2:1): 0.11 (UV, KMnO<sub>4</sub> solution). <sup>1</sup>H NMR (400 MHz, CDCl<sub>3</sub>): δ = 4.58 (d, *J* = 11.8 Hz, 2 H), 4.67 (d, *J* = 11.8 Hz, 2 H), 5.14 (dt, *J* = 1.2, 4.7 Hz, 1 H), 5.39 (ddd, *J* = 0.9, 1.3, 10.6 Hz, 1 H), 5.51 (ddd, *J* = 0.9, 1.3, 17.4 Hz, 1 H), 5.95 (ddd, *J* = 4.7, 10.6, 17.4 Hz, 1 H), 7.26–7.38 (m, 10 H). <sup>13</sup>C NMR (400 MHz, CDCl<sub>3</sub>): δ = 67.1, 100.3, 119.0, 127.6, 127.8, 128.4, 134.9, 138.0.

These data are identical to those reported previously.<sup>9</sup>

**1-[1-(Benzyloxy)allyl]-1H-pyrrole-2-carbaldehyde (3j).** 1H-Pyrrole-2-carbaldehyde (34.2 mg, 0.36 mmol) was treated with benzyloxyallene according to the general procedure and heated for 6 h. Column chromatography (*n*-heptane/EtOAc 20:1 → 4:1) afforded the product **3j** as slightly yellow oil (52.1 mg, 72%).

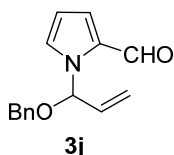

*R<sub>F</sub>* (silica gel, *n*-heptane/EtOAc = 1:1): 0.74 (UV, KMnO<sub>4</sub>-solution). <sup>1</sup>H NMR (400 MHz, CDCl<sub>3</sub>): δ = 4.47 (d, *J* = 11.5 Hz, 1 H), 4.53 (d, *J* = 11.5 Hz, 1 H), 5.28 (ddd, *J* = 0.8, 1.3, 10.5 Hz, 1 H), 5.33 (ddd, *J* = 0.8, 1.3, 17.1 Hz, 1 H), 6.01 (ddd, *J* = 4.4, 10.5, 17.1 Hz, 1 H), 6.33 (dd, *J* = 2.7, 3.9 Hz, 1 H), 6.97–7.01 (m, 2 H), 7.26–7.35 (m, 6 H), 9.58 (d, *J* = 1.0 Hz, 1 H). <sup>13</sup>C NMR (400 MHz, CDCl<sub>3</sub>): δ = 70.6, 85.1, 111.0, 118.1, 125.4, 127.8, 127.9, 128.1, 128.4, 135.2, 137.0, 179.8. IR (CHCl<sub>3</sub>): ν = 700, 747, 803, 1064, 1242, 1468, 1681, 2853, 3032 cm<sup>-1</sup>. HRMS (ESI<sup>+</sup>) calcd. for C<sub>15</sub>H<sub>16</sub>NO<sub>2</sub> (M + H)<sup>+</sup> 242.1181, found 242.1163.

**1-[1-(Benzyloxy)allyl]-1H-pyrrole-2-carbonitrile (3k).** 1H-Pyrrole-2-carbonitrile (33.2 mg, 0.36 mmol) was treated with benzyloxyallene according to the general procedure and heated for 6 h. Column chromatography (*n*-heptane/EtOAc 20:1 → 4:1) afforded the product **3k** as slightly yellow oil (59.3 mg, 83%).

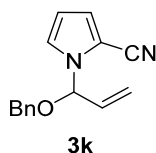

*R<sub>F</sub>* (silica gel, *n*-heptane/EtOAc = 10:1): 0.42 (UV, KMnO<sub>4</sub>-solution). <sup>1</sup>H NMR (400 MHz, CDCl<sub>3</sub>): δ = 4.45 (d, *J* = 11.6 Hz, 1 H), 4.51 (d, *J* = 11.6 Hz, 1 H), 5.39 (ddd, *J* = 0.8, 1.4, 10.5 Hz, 1 H), 5.41 (ddd, *J* = 0.8, 1.5, 17.1 Hz, 1 H), 5.86 (dt, *J* = 1.5, 4.4 Hz, 1 H), 6.04 (ddd, *J* = 4.5, 10.5, 17.2 Hz, 1 H), 6.27 (dd, *J* = 2.9, 3.8 Hz, 1 H), 6.86 (dd, *J* = 1.6, 3.9 Hz, 1 H), 7.04 (dd, *J* = 1.6, 2.8 Hz, 1 H), 7.28–7.39 (m, 5 H). <sup>13</sup>C NMR (400 MHz, CDCl<sub>3</sub>): δ = 70.5, 86.2, 103.1, 110.6, 113.4, 119.3, 120.8, 124.2, 128.0, 128.2, 128.6, 133.9, 136.1. IR (CHCl<sub>3</sub>): ν = 699, 740, 809, 1063, 1268, 1452, 2218, 2917, 3031 cm<sup>-1</sup>. HRMS (ESI<sup>+</sup>) calcd. for C<sub>15</sub>H<sub>15</sub>N<sub>2</sub>O [M+H]<sup>+</sup> 239.1184, found 239.1177.

**1-[1-(Benzyloxy)allyl]-1H-benzimidazole (3l).** Benzimidazole (42.5 mg, 0.36 mmol) was treated with benzyloxyallene according to the general procedure and heated for 4 h. Column chromatography (*n*-heptane/EtOAc 10:1 → 1:1) afforded the product **3l** as slightly yellow oil (62.6 mg, 79%).

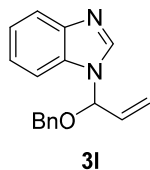

*R<sub>F</sub>* (silica gel, *n*-heptane/EtOAc = 1:1): 0.27 (UV, KMnO<sub>4</sub>-solution). <sup>1</sup>H NMR (400 MHz, CDCl<sub>3</sub>): δ = 4.36 (d, *J* = 11.9 Hz, 1 H), 4.55 (d, *J* = 11.9 Hz, 1 H), 5.42 (d, *J* = 10.7 Hz, 1 H), 5.47 (d, *J* = 17.3 Hz, 1 H), 5.95–5.99 (m, 1 H), 6.15 (ddd, *J* = 4.1, 10.5, 17.0 Hz, 1 H), 7.24–7.27 (m, 2 H), 7.28–7.40 (m, 5 H), 7.48–7.53 (m, 1 H), 7.80–7.87 (m, 1 H), 8.00 (s, 1 H). <sup>13</sup>C NMR (400 MHz, CDCl<sub>3</sub>): δ = 69.9, 83.9, 111.5, 119.3, 120.5, 122.7, 123.3, 128.0, 128.3, 128.6, 133.6, 136.1, 141.9, 144.3. IR (CHCl<sub>3</sub>): ν = 699, 723, 809, 1061, 1223, 2884, 3032 cm<sup>-1</sup>. HRMS (ESI<sup>+</sup>) calcd. for C<sub>17</sub>H<sub>17</sub>N<sub>2</sub>O (M + H)<sup>+</sup> 265.1341, found 265.1328.

**Ethyl 1-[1-(benzyloxy)allyl]-1H-indole-2-carboxylate (3m).** Ethyl indole-2-carboxylate (68.1 mg, 0.36 mmol) was treated with benzyloxyallene according to the general procedure and heated for 18 h. Column chromatography (*n*-heptane/EtOAc 20:1 → 1:1) afforded the product **3m** as slightly yellow oil (64.4 mg, 64%).

<sup>9</sup> Cui D.-M.; Zheng Z.-L.; Zhang C. *J. Org. Chem.* **2009**, *74*, 1426.



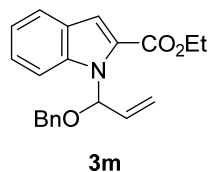

**R<sub>F</sub>** (silica gel, *n*-heptane/EtOAc = 10:1): 0.39 (UV, KMnO<sub>4</sub>-solution). **<sup>1</sup>H NMR** (400 MHz, CDCl<sub>3</sub>): δ = 1.37 (t, *J* = 7.1 Hz, 3 H), 4.33 (dq, *J* = 1.6, 7.1 Hz, 2 H), 4.39 (d, *J* = 11.7 Hz, 1 H), 4.42 (d, *J* = 11.7 Hz, 1 H), 5.26 (dd, *J* = 1.4, 10.6 Hz, 1 H), 5.34 (dd, *J* = 1.4, 17.3 Hz, 1 H), 6.21 (ddd, *J* = 4.1, 10.6, 17.2 Hz, 1 H), 7.15 (ddd, *J* = 0.9, 7.0, 8.0 Hz, 1 H), 7.19–7.30 (m, 7 H), 7.36 (d, *J* = 0.8 Hz, 1 H), 7.66 (dt, *J* = 0.8, 8.0 Hz, 1 H), 7.84 (ddd, *J* = 0.7, 1.6, 8.3 Hz, 1 H). **<sup>13</sup>C NMR** (400 MHz, CDCl<sub>3</sub>): δ = 14.4, 60.8, 70.0, 85.0, 112.3, 115.1, 117.9, 121.2, 122.5, 125.0, 126.9, 127.8, 128.0, 128.1, 128.3, 134.9, 137.3, 138.0, 162.2. **IR** (CHCl<sub>3</sub>): ν = 698, 750, 813, 1065, 1198, 1703, 2869, 3031 cm<sup>-1</sup>. **HRMS** (ESI<sup>+</sup>) calcd. for C<sub>21</sub>H<sub>22</sub>N<sub>3</sub>O (M + H)<sup>+</sup> 336.1600, found 336.1617.

**1-[1-(Benzyloxy)allyl]-1H-1,2,4-triazole (3n)**. 1,2,4-Triazole (24.9 mg, 0.36 mmol) was treated with benzyloxyallene according to the general procedure and heated for 4 h. Column chromatography (*n*-heptane/EtOAc 20:1 → 4:1) afforded the product **3n** as slightly yellow oil (71.4 mg, 90%).

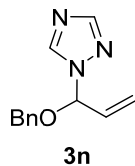

**R<sub>F</sub>** (silica gel, *n*-heptane/EtOAc = 2:1): 0.44 (UV, KMnO<sub>4</sub>-solution). **<sup>1</sup>H NMR** (400 MHz, CDCl<sub>3</sub>): δ = 4.60 (d, *J* = 11.9 Hz, 1 H), 4.68 (d, *J* = 11.9 Hz, 1 H), 5.59 (dd, *J* = 1.3, 10.3 Hz, 1 H), 5.60 (dd, *J* = 1.3, 17.2 Hz, 1 H), 5.88 (dt, *J* = 1.3, 4.9 Hz, 1 H), 6.02 (ddd, *J* = 4.9, 10.4, 17.1 Hz, 1 H), 7.24–7.28 (m, 2 H), 7.28–7.40 (m, 5 H), 7.80 (s, 1 H). **<sup>13</sup>C NMR** (400 MHz, CDCl<sub>3</sub>): δ = 72.0, 86.8, 107.6, 110.7, 111.3, 122.1, 123.8, 128.1, 128.9, 130.0, 131.6, 134.6, 139.7. **IR** (CHCl<sub>3</sub>): ν = 678, 699, 740, 808, 1073, 1273, 1500, 2874, 3032 cm<sup>-1</sup>. **HRMS** (ESI<sup>+</sup>) calcd. for C<sub>12</sub>H<sub>14</sub>N<sub>3</sub>O (M + H)<sup>+</sup> 216.1137, found 216.1129.

**2-[1-(Benzyloxy)allyl]-2H-1,2,3-triazole (3oa)** and **1-[1-(benzyloxy)allyl]-1H-1,2,3-triazole (3ob)**. 1H-1,2,3-Triazole (24.9 mg, 0.36 mmol) was treated with benzyloxyallene according to the general procedure and heated for 6 h. Ratio N-2/N-1 = 85:15 was determined by <sup>1</sup>H NMR spectroscopy. Column chromatography (*n*-heptane/EtOAc 10:1 → 2:1) afforded the product **3oa** (50 mg, 76%) and the product **3ob** (8 mg, 12%) as a slightly yellow oil.

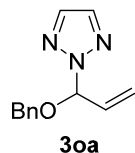

**Compound 3oa: R<sub>F</sub>** (silica gel, *n*-heptane/EtOAc = 1:1): 0.69 (UV, KMnO<sub>4</sub>-solution). **<sup>1</sup>H NMR** (400 MHz, CDCl<sub>3</sub>): δ = 4.47 (d, *J* = 12.1 Hz, 1 H), 4.53 (d, *J* = 12.1 Hz, 1 H), 5.44 (dt, *J* = 1.1, 10.5 Hz, 1 H), 5.56 (dt, *J* = 1.1, 17.2 Hz, 1 H), 6.16 (dt, *J* = 1.2, 5.4 Hz, 1 H), 6.27 (ddd, *J* = 5.3, 10.5, 17.1 Hz, 1 H), 7.26–7.38 (m, 5 H), 7.71 (s, 2 H). **<sup>13</sup>C NMR** (400 MHz, CDCl<sub>3</sub>): δ = 70.4, 90.7, 119.6, 127.0, 128.4, 132.7, 135.0, 136.5. **IR** (CHCl<sub>3</sub>): ν = 699, 738, 820, 1064, 1314, 2874, 3032 cm<sup>-1</sup>. **HRMS** (ESI<sup>+</sup>) calcd. for C<sub>12</sub>H<sub>14</sub>N<sub>3</sub>O (M + H)<sup>+</sup> 216.1137, found 216.1133.

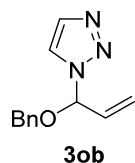

**Compound 3ob: R<sub>F</sub>** (silica gel, *n*-heptane/EtOAc = 1:1): 0.46 (UV, KMnO<sub>4</sub>-solution). **<sup>1</sup>H NMR** (400 MHz, CDCl<sub>3</sub>): δ = 4.50 (s, 2 H), 5.45 (ddd, *J* = 0.9, 1.6, 10.6 Hz, 1 H), 5.57 (ddd, *J* = 0.9, 1.6, 17.2 Hz, 1 H), 6.06 (ddd, *J* = 4.2, 10.6, 17.2 Hz, 1 H), 6.35 (dt, *J* = 1.6, 4.2 Hz, 1 H), 7.27–7.39 (m, 5 H), 7.72 (d, *J* = 1.1 Hz, 1 H), 7.78 (dd, *J* = 0.6, 1.2 Hz, 1 H). **<sup>13</sup>C NMR** (400 MHz, CDCl<sub>3</sub>): δ = 69.6, 86.1, 118.9, 120.1, 127.0, 127.2, 127.6, 131.7, 133.6, 135.0. **IR** (CHCl<sub>3</sub>): ν = 672, 816, 1064, 1086, 1250, 2902, 3030 cm<sup>-1</sup>. **HRMS** (ESI<sup>+</sup>) calcd. for C<sub>12</sub>H<sub>14</sub>N<sub>3</sub>O (M + H)<sup>+</sup> 216.1137, found 216.1130.

**2-[1-(Benzyloxy)allyl]-2H-benzotriazole (3pa)** and **1-[1-(benzyloxy)allyl]-2H-benzotriazole (3pb)**. Benzotriazole (42.9 mg, 0.36 mmol) was treated with benzyloxyallene according to the general procedure and heated for 6 h. Ratio N-1/N-2 = 87:13 was determined by <sup>1</sup>H NMR spectroscopy. Column chromatography (*n*-heptane/EtOAc 20:1 → 10:1) afforded the product **3pa** (5 mg, 6%) and the product **3pb** (68 mg, 85%) as a slightly yellow oil.

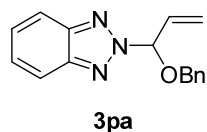

**Compound 3pa: R<sub>F</sub>** (silica gel, *n*-heptane/EtOAc = 10:1): 0.35 (UV, KMnO<sub>4</sub>-solution). **<sup>1</sup>H NMR** (400 MHz, CDCl<sub>3</sub>): δ = 4.53 (d, *J* = 12.0 Hz, 1 H), 4.06 (d, *J* = 12.0 Hz, 1 H), 5.47–5.51 (m, 1 H), 5.61–5.68 (m, 1 H), 6.38 (ddd, *J* = 5.4, 10.5, 17.4 Hz, 1 H), 6.40–6.44 (m, 1 H), 7.26–7.37 (m, 5 H), 7.40–7.45 (m, 2 H), 7.90–7.95 (m, 2 H). **<sup>13</sup>C NMR** (400 MHz, CDCl<sub>3</sub>): δ = 70.9, 92.7, 118.6, 120.1, 126.9, 128.1, 128.4, 132.7, 136.1. **IR** (CHCl<sub>3</sub>): ν = 698, 747, 816, 849, 1082, 1251, 2918, 3030 cm<sup>-1</sup>. **HRMS** (ESI<sup>+</sup>) calcd. for C<sub>16</sub>H<sub>16</sub>N<sub>3</sub>O (M + H)<sup>+</sup> 266.1293, found 266.1282.

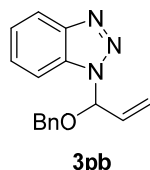

**Compound 3pb: R<sub>F</sub>** (silica gel, *n*-heptane/EtOAc = 10:1): 0.23 (UV, KMnO<sub>4</sub>-solution). **<sup>1</sup>H NMR** (400 MHz, CDCl<sub>3</sub>): δ = 4.43 (d, *J* = 11.9 Hz, 1 H), 4.47 (d, *J* = 11.9 Hz, 1 H), 5.48 (ddd, *J* = 0.9, 1.8, 10.6 Hz, 1 H), 5.60 (ddd, *J* = 0.9, 1.7, 17.2 Hz, 1 H), 6.20 (ddd, *J* = 3.9, 10.6, 17.2 Hz, 1 H), 6.67 (dt, *J* = 1.8, 3.7 Hz, 1 H), 7.24–7.35 (m, 5 H), 7.39 (ddd, *J* = 1.1, 7.0, 8.1 Hz, 1 H), 7.46 (ddd, *J* = 1.1, 7.0, 8.2 Hz, 1 H), 7.71 (dt, *J* = 1.0, 8.3 Hz, 1 H), 8.09 (dt, *J* = 1.0, 8.2 Hz, 1 H). **<sup>13</sup>C NMR** (400 MHz, CDCl<sub>3</sub>): δ = 70.4, 87.7, 111.7, 119.8, 120.0, 124.3, 127.5, 128.1, 128.2, 128.5, 132.5, 136.1. **IR** (CHCl<sub>3</sub>): ν = 699, 747, 815, 927, 1077, 1237, 1450, 2916, 3030 cm<sup>-1</sup>. **HRMS** (ESI<sup>+</sup>) calcd. for C<sub>16</sub>H<sub>16</sub>N<sub>3</sub>O (M + H)<sup>+</sup> 266.1293, found 266.1285.

**7-[1-(Benzyloxy)allyl]-1,3-dimethyl-1H-purine-2,6(3H,7H)-dione (3q)**. Theophylline (64.9 mg, 0.36 mmol) was treated with benzyloxyallene according to the general procedure and heated for 6 h. Ratio N-7/N-9 > 95:5 was determined by <sup>1</sup>H NMR spectroscopy. Column chromatography (*n*-heptane/EtOAc 10:1 → 1:1) afforded the product **3q** as a white powder. (81.3 mg, 83%).

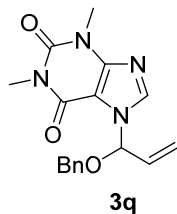

**R<sub>F</sub>** (silica gel, *n*-heptane/EtOAc = 1:1): 0.38 (UV, KMnO<sub>4</sub>-solution). M<sub>p</sub>: 84–88 °C. **<sup>1</sup>H NMR** (400 MHz, CDCl<sub>3</sub>): δ = 3.43 (s, 3 H), 3.60 (s, 3 H), 4.62 (d, *J* = 11.5 Hz, 1 H), 4.71 (d, *J* = 11.6 Hz, 1 H), 5.43 (ddd, *J* = 0.9, 1.3, 10.7 Hz, 1 H), 5.55 (ddd, *J* = 4.1, 10.4, 17.3 Hz, 1 H), 6.07 (ddd, *J* = 4.8, 10.5, 17.1 Hz, 1 H), 6.70 (dt, *J* = 1.4, 4.7 Hz, 1 H), 7.25–7.35 (m, 5 H), 7.82 (s, 1 H). **<sup>13</sup>C NMR** (400 MHz, CDCl<sub>3</sub>): δ = 28.1, 29.8, 71.6, 85.2, 106.7, 119.7, 127.8, 128.2, 128.5, 133.6, 136.4, 139.4, 148.6, 151.5, 155.2. **IR** (CHCl<sub>3</sub>): ν = 699, 747, 1064, 1540, 1659, 1702, 2918, 3112 cm<sup>-1</sup>. **HRMS** (ESI<sup>+</sup>) calcd. for C<sub>17</sub>H<sub>19</sub>N<sub>4</sub>O<sub>3</sub> (M + H)<sup>+</sup> 327.1457, found 327.1450.

**7-[1-(Benzyloxy)allyl]-8-bromo-1,3-dimethyl-1H-purine-2,6(3*H*,7*H*)-dione (3r)**. 2-Bromotheophylline (93.2 mg, 0.36 mmol) was treated with benzyloxyallene according to the general procedure and heated for 6 h. Ratio N-7/N-9 > 99:1 was determined by <sup>1</sup>H NMR spectroscopy. Column chromatography (*n*-heptane/EtOAc 10:1 → 1:1) afforded the product **3r** as yellow solid (96.0 mg, 79%).

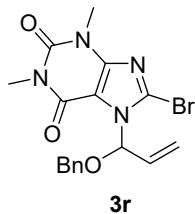

**R<sub>F</sub>** (silica gel, *n*-heptane/EtOAc = 1:1): 0.23 (UV, KMnO<sub>4</sub>-solution). M<sub>p</sub>: 92–94 °C. **<sup>1</sup>H NMR** (400 MHz, CDCl<sub>3</sub>): δ = 3.41 (s, 3 H), 3.54 (s, 3 H), 4.56 (d, *J* = 11.9 Hz, 1 H), 4.67 (d, *J* = 11.9 Hz, 1 H), 5.38–5.50 (m, 2 H), 6.36 (ddd, *J* = 5.2, 10.2, 16.1 Hz, 1 H), 6.85 (s, 1 H), 7.27–7.30 (m, 6 H). **<sup>13</sup>C NMR** (400 MHz, CDCl<sub>3</sub>): δ = 28.2, 29.8, 71.8, 87.5, 108.8, 120.2, 127.9, 128.1, 128.3, 132.9, 136.1, 148.2, 151.0, 154.0. **IR** (CHCl<sub>3</sub>): ν = 513, 700, 747, 977, 1087, 1361, 1532, 1658, 1702, 2923 cm<sup>-1</sup>. **HRMS** (ESI<sup>+</sup>) calcd. for C<sub>17</sub>H<sub>18</sub>BrN<sub>4</sub>O<sub>3</sub> (M + H)<sup>+</sup> 405.0562, found 405.0553.

## Screenings of reaction conditions for enantioselective hydroamination reactions

**Table 1.** Screening of the Catalysts<sup>a</sup>

Reaction scheme: **1a** + **2a**  $\xrightarrow[\text{Ligand}^* (5.0 \text{ mol } \%)]{\text{Pd}_2\text{dba}_3 (2.5 \text{ mol } \%)}$  **3a**

| entry | ligands                                   | yield (%) <sup>b</sup> | ee (%) <sup>c</sup> |
|-------|-------------------------------------------|------------------------|---------------------|
| 1     | ( <i>R</i> )-(+)-MeO-BIPHEP               | n.r.                   | –                   |
| 2     | ( <i>R</i> )-SEGPPOS                      | 56                     | –                   |
| 3     | ( <i>R</i> )-BINAP                        | 72                     | 11                  |
| 4     | ( <i>S,S</i> )-iPr-DuPhos                 | 32                     | 33                  |
| 5     | ( <i>R,R</i> )-DACH-phenyl Trost ligand   | 74                     | 77                  |
| 6     | ( <i>R,R</i> )-DACH-naphthyl Trost ligand | 61                     | 83                  |
| 7     | Josiphos SL-J001-1                        | 82                     | –                   |
| 8     | Josiphos SL-J002-2                        | 85                     | –                   |
| 9     | Josiphos SL-J015-2                        | 42                     | –                   |
| 10    | Taniaphos SL-T001-2                       | 14                     | –                   |

<sup>a</sup>Conditions: 2.5 mol % Pd<sub>2</sub>dba<sub>3</sub>, 5 mol % of ligand, 0.3 mmol of **1a** and 0.36 mmol of **2a**, 3.0 mL THF, 60 °C for 18 h. <sup>b</sup>Isolated yield. <sup>c</sup>Enantiomeric excess was determined by HPLC.

Chiral ligands widely used in palladium asymmetric catalysis:

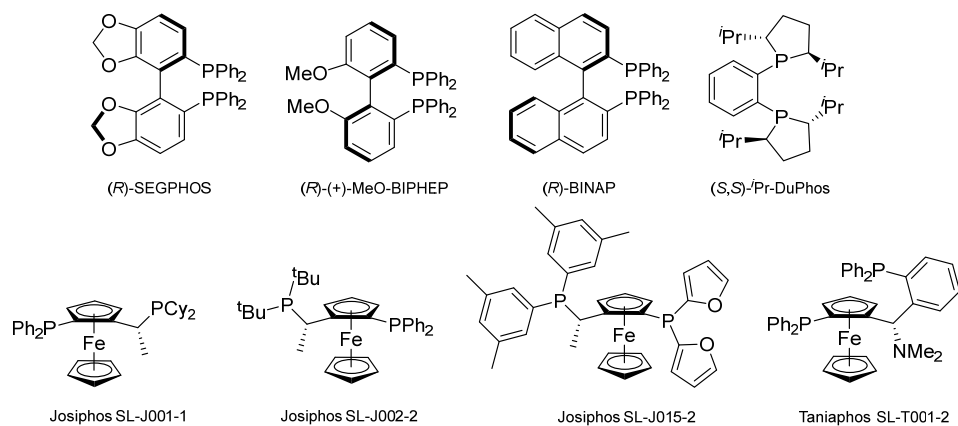

Chiral palladium ligands successfully applied by different groups in the synthesis of chiral *O,O*- and *N,O*-acetals:<sup>10</sup>

<sup>10</sup> (a) Trost, B. M.; Jäkel, C.; Plietker, B. *J. Am. Chem. Soc.* **2003**, *125*, 4438; (b) Kim H.; Rhee Y. H. *J. Am. Chem. Soc.* **2012**, *134*, 4011; (c) Jiang L.; Jia T.; Wang M.; Liao J.; Cao P. *Org. Lett.* **2015**, *17*, 1070 and references therein.

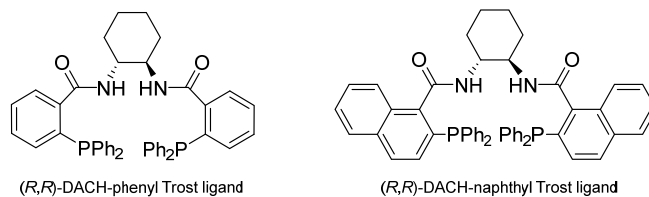

**Table 2.** Screening of the Reaction Conditions<sup>a</sup>:

| entry          | solvent     | T (°C) | time (h) | yield (%) <sup>b</sup> | ee (%) <sup>c</sup> |
|----------------|-------------|--------|----------|------------------------|---------------------|
| 1              | MeCN        | 60     | 18       | 55                     | 87                  |
| 2              | 1,4-Dioxane | 60     | 18       | 63                     | 82                  |
| 3              | DCE         | 60     | 18       | 59                     | 92                  |
| 4              | DCE         | 23     | 18       | 21                     | 87                  |
| 5              | DCE         | 40     | 18       | 44                     | 82                  |
| 6              | DCE         | 60     | 30       | 70                     | 78                  |
| 7 <sup>d</sup> | DCE         | 60     | 18       | 74                     | 82                  |

<sup>a</sup>Conditions: 2.5 mol % Pd<sub>2</sub>(dba)<sub>3</sub>, 5 mol % of (R,R)-DACH-naphthyl Trost Ligand, 0.3 mmol of **1a** and 0.36 mmol of **2a**, 3.0 mL of solvent. <sup>b</sup>Isolated yield. <sup>c</sup>Enantiomeric excess was determined by HPLC. <sup>d</sup>150 mol % DBU.

## General procedures for enantioselective palladium-catalyzed hydroamination reactions

**Scheme 4.** (A) Scope of Alkoxyallenes. (B) Determination of the Absolute Configuration on Example of (S)-**3q**

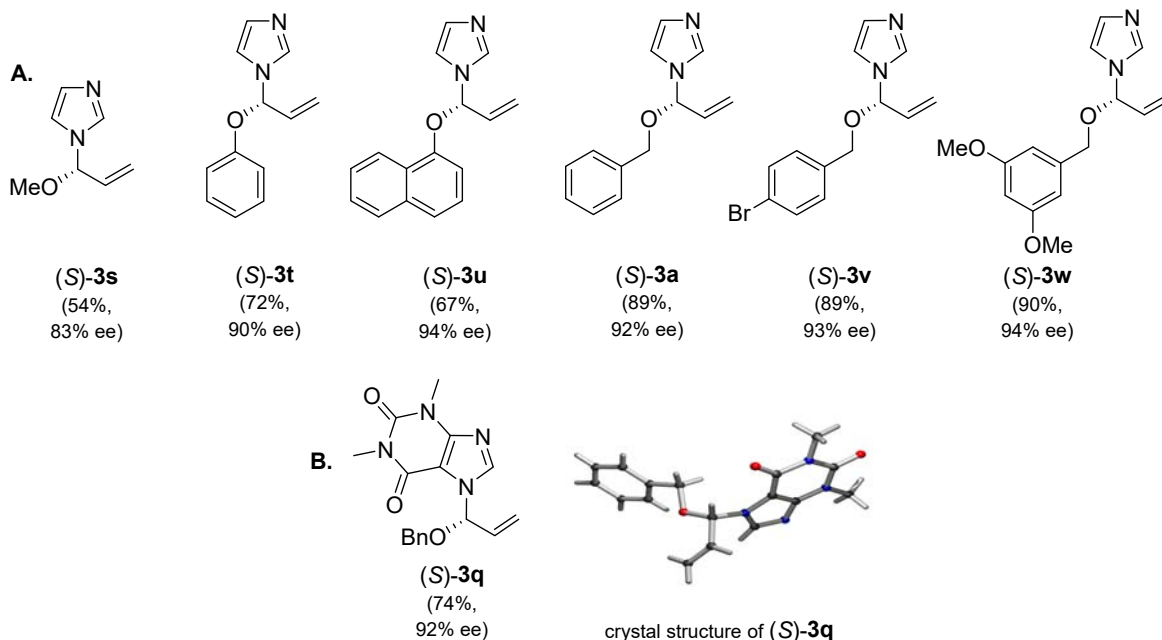

**General procedure:** The reaction was performed in a 5.0 mL Schlenk tube under argon. Pd<sub>2</sub>(dba)<sub>3</sub> (6.9 mg, 0.0075 mmol, 0.025 equiv.) and (R,R)-DACH-naphthyl Trost Ligand (6.2 mg, 0.015 mmol, 0.05 equiv.) were dissolved in dry DCE (3.0 mL). The re-

sulting catalyst solution was stirred for 30 minutes. Imidazole (24.5 mg, 0.36 mmol, 1.2 equiv.) and alkoxyallene (0.3 mmol, 1.0 equiv.) were added and the flask was sealed. The reaction mixture was stirred at 60 °C for 18 h. After cooling down to room temperature, the solvent was removed *in vacuo* and the crude residue was purified by column chromatography as indicated.

**(S)-1-(1-Methoxyallyl)-1H-imidazole ((S)-3s).** Imidazole was treated with allene **1b** (21.0 mg, 0.3 mmol) according to the general procedure. Column chromatography (*n*-heptane/EtOAc 40:1 → 20:1) afforded the product **3s** as slightly yellow oil (22.4 mg, 54%, 83% ee).

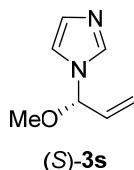

**R<sub>F</sub>** (silica gel, *n*-heptane/EtOAc = 20:1): 0.58 (UV, KMnO<sub>4</sub>-solution). **<sup>1</sup>H NMR** (400 MHz, CDCl<sub>3</sub>): δ = 3.28 (s, 3 H), 4.34 (d, *J* = 11.9 Hz, 1 H), 4.53 (d, *J* = 11.9 Hz, 1 H), 5.39 (ddd, *J* = 0.9, 1.5, 10.6 Hz, 1 H), 5.40 (ddd, *J* = 0.9, 1.5, 17.2 Hz, 1 H), 5.52 (dt, *J* = 1.3, 4.2 Hz, 1 H), 6.01 (ddd, *J* = 4.4, 10.5, 17.2 Hz, 1 H), 7.03 (s, 1 H), 7.12 (s, 1 H), 7.66 (s, 1 H). **<sup>13</sup>C NMR** (400 MHz, CDCl<sub>3</sub>): δ = 55.7, 87.3, 116.8, 119.0, 129.7, 133.9, 136.2. **IR** (CHCl<sub>3</sub>): ν = 1067, 1218, 1411, 1491, 2939, 3112 cm<sup>-1</sup>. **HRMS** (ESI<sup>+</sup>) calcd. for C<sub>7</sub>H<sub>11</sub>N<sub>2</sub>O (M + H)<sup>+</sup> 139.0871, found 139.0862. **HPLC**: ee: 83%, Chiralpak OD-H (250 × 4.6 mm), flow: 1.0 mL/min, *n*-heptane/ethanol 98/2, retention times: (*R*)-**3s**: 24.201 min, (*S*)-**3s**: 26.823 min. [α]<sub>D</sub><sup>22</sup> = +0.9 (c 0.3, CHCl<sub>3</sub>).

**(S)-1-(1-Phenoxyallyl)-1H-imidazole ((S)-3t).** Imidazole was treated with allene **1c** (39.7 mg, 0.3 mmol) according to the general procedure. Column chromatography (*n*-heptane/EtOAc 40:1 → 20:1) afforded the product **6s** as slightly yellow oil (43.2 mg, 72%, 90% ee).

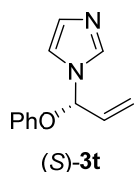

**R<sub>F</sub>** (silica gel, *n*-heptane/EtOAc = 10:1): 0.28 (UV, KMnO<sub>4</sub>-solution). **<sup>1</sup>H NMR** (400 MHz, CDCl<sub>3</sub>): δ = 5.52 (ddd, *J* = 0.6, 1.4, 10.5 Hz, 1 H), 5.57 (ddd, *J* = 0.6, 1.5, 17.1 Hz, 1 H), 6.18 (ddd, *J* = 4.3, 10.5, 17.1 Hz, 1 H), 6.30 (dt, *J* = 1.5, 4.3 Hz, 1 H), 6.84–6.89 (m, 2 H), 7.03–7.11 (m, 3 H), 7.23–7.31 (m, 2 H), 7.61 (s, 1 H). **<sup>13</sup>C NMR** (400 MHz, CDCl<sub>3</sub>): δ = 85.2, 116.9, 117.7, 119.9, 123.6, 129.8, 129.9, 133.3, 136.0, 155.9. **IR** (CHCl<sub>3</sub>): ν = 692, 755, 796, 1071, 1210, 1489, 1589, 2916, 3109 cm<sup>-1</sup>. **HRMS** (ESI<sup>+</sup>) calcd. for C<sub>12</sub>H<sub>13</sub>N<sub>2</sub>O (M + H)<sup>+</sup> 201.1028, found 201.1018. **HPLC**: ee: 90%, Chiralpak OD-H (250 × 4.6 mm), flow: 1.0 mL/min, *n*-heptane/ethanol 97/3, retention times: (*R*)-**3t**: 20.989 min, (*S*)-**3t**: 27.478 min. [α]<sub>D</sub><sup>22</sup> = +0.7 (c 0.25, CHCl<sub>3</sub>).

**(S)-1-[1-(Naphthalen-1-yloxy)allyl]-1H-imidazole ((S)-3u).** Imidazole was treated with allene **1f** (54.7 mg, 0.3 mmol) according to the general procedure. Column chromatography (*n*-heptane/EtOAc 20:1 → 4:1) afforded the product **3u** as slightly yellow oil (50.3 mg, 67%, 94% ee).

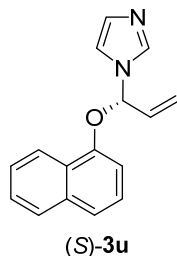

**R<sub>F</sub>** (silica gel, *n*-heptane/EtOAc = 1:2): 0.36 (UV, KMnO<sub>4</sub>-solution). **<sup>1</sup>H NMR** (400 MHz, CDCl<sub>3</sub>): δ = 5.60 (dd, *J* = 0.9, 10.5 Hz, 1 H), 5.71 (dd, *J* = 1.0, 17.1 Hz, 1 H), 6.30 (ddd, *J* = 4.3, 10.5, 17.1 Hz, 1 H), 6.45 (dt, *J* = 1.4, 4.3 Hz, 1 H), 6.74 (d, *J* = 7.5 Hz, 1 H), 7.12 (d, *J* = 13.6 Hz, 2 H), 7.30 (t, *J* = 8.0 Hz, 1 H), 7.46–7.53 (m, 2 H), 7.55 (d, *J* = 8.3 Hz, 1 H), 7.64 (s, 1 H), 7.78–7.85 (m, 1 H), 8.09–8.15 (m, 1 H). **<sup>13</sup>C NMR** (400 MHz, CDCl<sub>3</sub>): δ = 85.3, 110.5, 120.1, 121.5, 123.4, 125.5, 126.0, 126.3, 126.7, 127.8, 130.0, 133.2, 134.7, 151.7. **IR** (CHCl<sub>3</sub>): ν = 662, 773, 794, 1069, 1262, 1393, 1579, 2919, 3054 cm<sup>-1</sup>. **HRMS** (ESI<sup>+</sup>) calcd. for C<sub>16</sub>H<sub>15</sub>N<sub>2</sub>O (M + H)<sup>+</sup> 251.1184, found 251.1172. **HPLC**: ee: 94%, Chiralpak OD-H (250 × 4.6 mm), flow: 1.0 mL/min, *n*-heptane/ethanol 97/3, retention times: (*R*)-**3u**: 23.367 min, (*S*)-**3u**: 28.622 min. [α]<sub>D</sub><sup>22</sup> = +1.3 (c 0.3, CHCl<sub>3</sub>).

**(S)-1-[1-(Benzyloxy)allyl]-1H-imidazole ((S)-3a).** Imidazole was treated with allene **1a** (43.9 mg, 0.3 mmol) according to the general procedure. The solvent was removed *in vacuo* and the crude residue was filtrated over diatomaceous-earth pad with *n*-heptane to afford the product **3a** as slightly yellow oil (57 mg, 89%, 92% ee).

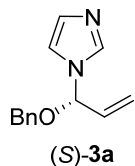

All analytical data are identical to those reported previously. **HPLC**: ee: 92%, Chiralpak OD-H (250 × 4.6 mm), flow: 1.0 mL/min, *n*-heptane/ethanol 97/3, retention times: (*R*)-**3a**: 19.953 min, (*S*)-**3a**: 22.876 min. [α]<sub>D</sub><sup>22</sup> = +0.5 (c 0.2, CHCl<sub>3</sub>).

**(S)-1-[1-[(4-Bromobenzyl)oxy]allyl]-1H-imidazole ((S)-3v).** Imidazole was treated with allene **1d** (67.5 mg, 0.3 mmol) according to the general procedure. Column chromatography (*n*-heptane/EtOAc 20:1 → 10:1) afforded the product **3v** as slightly yellow oil (78 mg, 89%, 93% ee).

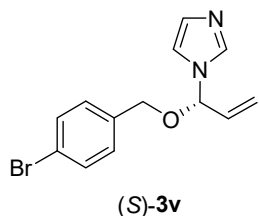

**R<sub>F</sub>** (silica gel, *n*-heptane/EtOAc = 10:1): 0.17 (UV, KMnO<sub>4</sub>-solution). **<sup>1</sup>H NMR** (400 MHz, CDCl<sub>3</sub>): δ = 4.31 (d, *J* = 12.0 Hz, 1 H), 4.43 (d, *J* = 12.0 Hz, 1 H), 5.40 (ddd, *J* = 0.9, 1.5, 10.5 Hz, 1 H), 5.41 (ddd, *J* = 0.9, 1.5, 17.2 Hz, 1 H), 5.65 (dt, *J* = 1.5, 4.3 Hz, 1 H), 6.04 (ddd, *J* = 4.3, 10.5, 17.2 Hz, 1 H), 7.05 (s, 1 H), 7.11–7.18 (m, 2 H), 7.45–7.51 (m, 2 H), 7.64 (s, 1 H). **<sup>13</sup>C NMR** (400 MHz, CDCl<sub>3</sub>): δ = 68.9, 84.6, 119.2, 122.1, 129.4, 130.1, 131.7, 133.9, 135.3, 136.3. **IR** (CHCl<sub>3</sub>): ν = 479, 663, 805, 1011, 1068, 1216, 1488, 2873, 3109 cm<sup>-1</sup>. **HRMS** (ESI<sup>+</sup>) calcd. for C<sub>13</sub>H<sub>13</sub>BrN<sub>2</sub>ONa (M + Na)<sup>+</sup> 315.0103, found 315.0111. **HPLC**: ee: 93%, Chiralpak OD-H (250 × 4.6 mm), flow: 1.0 mL/min, *n*-heptane/ethanol 97/3, retention times: (*R*)-**3v**: 22.208 min, (*S*)-**3v**: 27.493 min. [α]<sub>D</sub><sup>22</sup> = +0.8 (c 0.3, CHCl<sub>3</sub>).

(*S*)-1-[1-(3,5-Dimethoxybenzyloxy)allyl]-1*H*-imidazole ((*S*)-**3w**). Imidazole was treated with allene **1e** (61.9 mg, 0.3 mmol) according to the general procedure. Column chromatography (*n*-heptane/EtOAc 10:1 → 1:1) afforded the product **3w** as slightly yellow oil (74.0 mg, 90%, 94% ee).

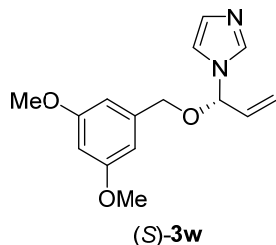

**R<sub>F</sub>** (silica gel, *n*-heptane/EtOAc = 1:1): 0.43 (UV, KMnO<sub>4</sub>-solution). **<sup>1</sup>H NMR** (400 MHz, CDCl<sub>3</sub>): δ = 3.78 (s, 6 H), 4.27 (d, *J* = 12.2 Hz, 1 H), 4.48 (d, *J* = 12.2 Hz, 1 H), 5.39 (ddd, *J* = 0.8, 1.4, 10.5 Hz, 1 H), 5.42 (ddd, *J* = 0.8, 1.5, 17.2 Hz, 1 H), 5.67 (dt, *J* = 1.3, 4.3 Hz, 1 H), 6.04 (ddd, *J* = 4.3, 10.5, 17.2 Hz, 1 H), 6.41 (t, *J* = 2.1 Hz, 1 H), 6.43 (d, *J* = 2.0 Hz, 2 H), 7.06 (s, 1 H), 7.14 (s, 1 H), 7.64 (s, 1 H). **<sup>13</sup>C NMR** (400 MHz, CDCl<sub>3</sub>): δ = 55.3, 69.6, 84.3, 100.1, 105.6, 116.9, 119.0, 130.0, 134.1, 136.3, 138.5, 161.0. **IR** (CHCl<sub>3</sub>): ν = 664, 833, 1060, 1064, 1153, 1205, 1462, 1597, 2931, 3110 cm<sup>-1</sup>. **HRMS** (ESI<sup>+</sup>) calcd. for C<sub>15</sub>H<sub>19</sub>N<sub>2</sub>O<sub>3</sub> (M + H)<sup>+</sup> 275.1396, found 275.1384. **HPLC**: ee: 94%, Chiralpak OD-H (250 × 4.6 mm), flow: 1.0 mL/min, *n*-heptane/ethanol 97/3, retention times: (*R*)-**3w**: 30.201 min, (*S*)-**3w**: 35.069 min. [α]<sub>D</sub><sup>22</sup> = +1.0 (c 0.3, CHCl<sub>3</sub>).

(*S*)-7-[1-(Benzyloxy)allyl]-1,3-dimethyl-1*H*-purine-2,6(3*H*,7*H*)-dione ((*S*)-**3q**). Theophylline (64.9 mg, 0.36 mmol) was treated with allene **1a** (43.9 mg, 0.3 mmol) according to the general procedure. Column chromatography (*n*-heptane/EtOAc 10:1 → 1:1) afforded the product **3q** as a white powder (72.0 mg, 74%, 92% ee).

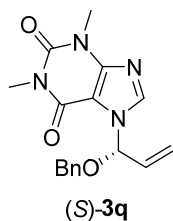

All analytical data are identical to those reported previously. **HPLC**: ee: 92%, Phenomenex Lux 3u Cellulose-1, flow: 0.5 mL/min, *n*-heptane/2-propanol 70/30, retention times: (*R*)-**3q**: 15.832 min, (*S*)-**3q**: 16.518 min. [α]<sub>D</sub><sup>22</sup> = +0.4 (c 0.2, CHCl<sub>3</sub>).

#### Determination of the absolute configuration

High quality single crystal of (*S*)-**3q** was obtained through slow solvent evaporation: a saturated solution of **3q** in toluene was prepared and filtered over an Acrodisc HPLC syringe filter to ensure the absence of crystallites. The resulting filtrate was transferred to a scintillation flask that was sealed and equipped with a hollow needle to allow slow evaporation of the solvent. The acquired single crystal was subjected to single X-ray diffraction and was subsequently analyzed with chiral HPLC to unambiguously link the absolute configuration with the retention time of one of the enantiomers of **3q**.

# <sup>1</sup>H and <sup>13</sup>C NMR Spectra

IB005-8\_PROTON\_01

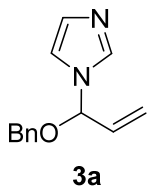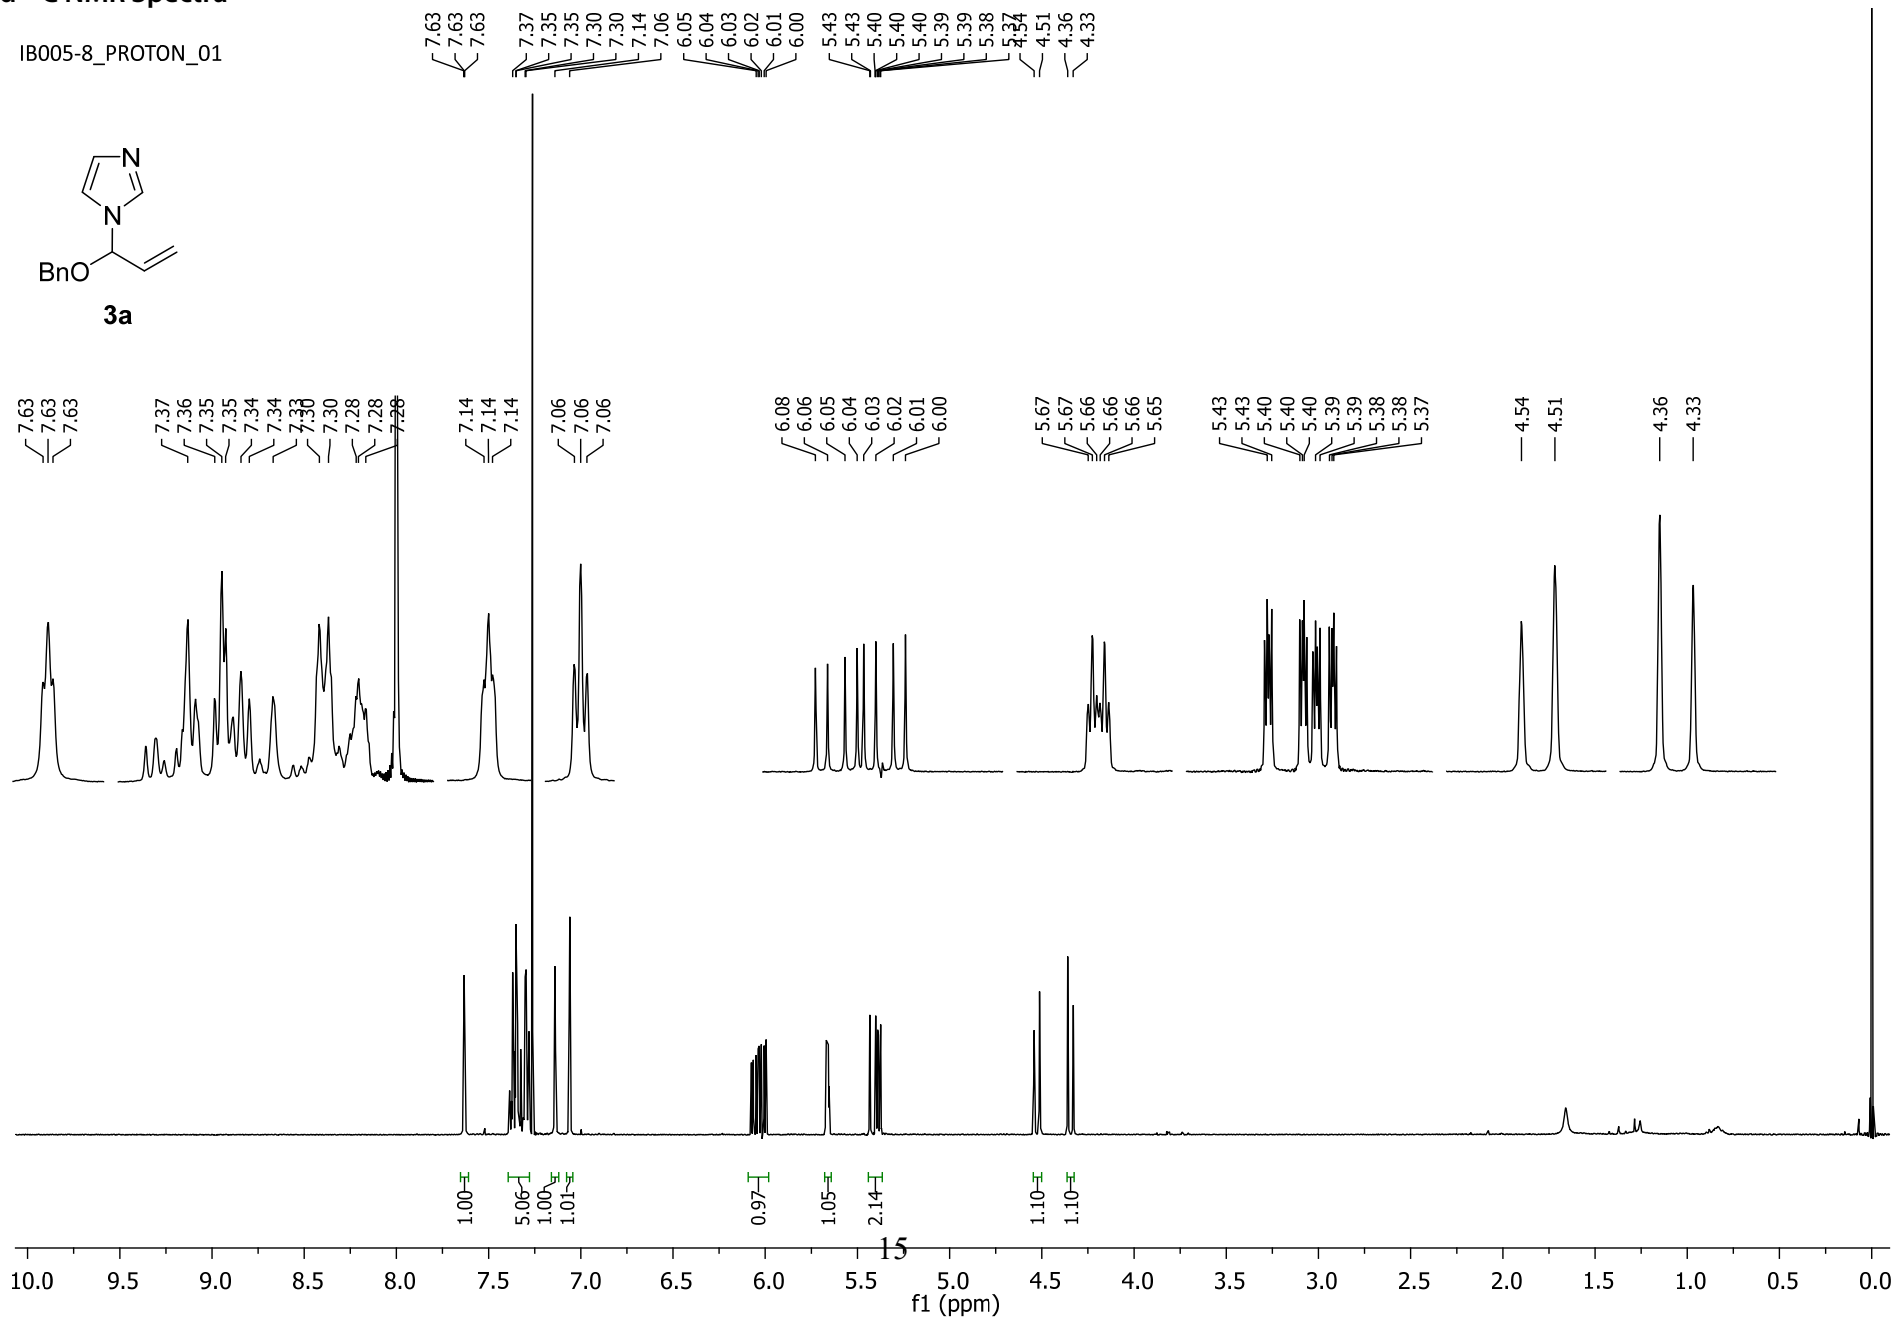

IB005-8\_C13\_\_CARBON\_01

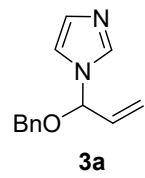

136.30  
134.13  
130.04  
128.64  
128.24  
127.92  
119.02  
116.89  
109.95  
84.38  
69.69

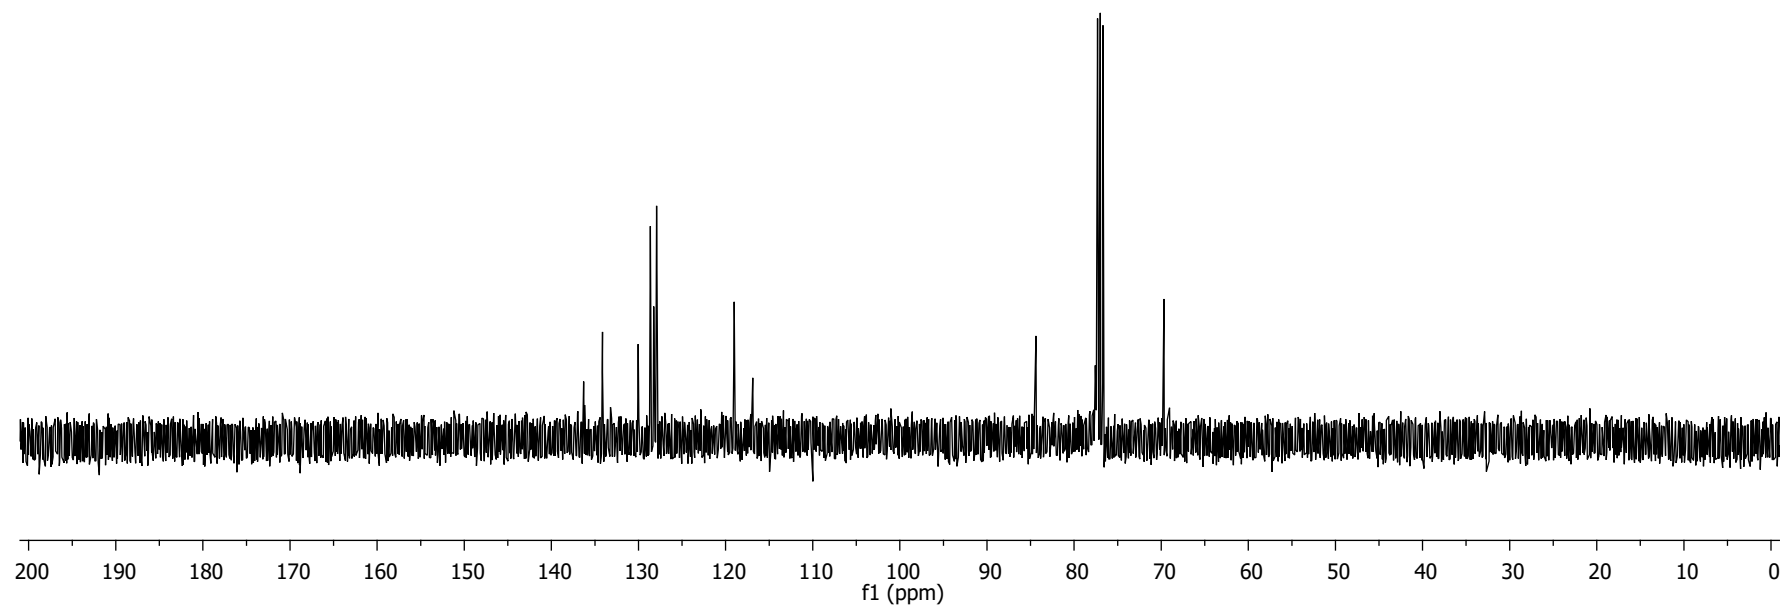



IB083-1\_PROTON\_01

9.84  
9.83  
7.47  
7.47  
7.47  
7.36  
7.35  
7.35  
7.35  
7.34  
7.33  
7.32  
7.32  
7.32  
7.27  
7.27  
7.26  
7.25  
7.25  
7.25  
7.24  
6.99  
6.99  
6.98  
6.98  
5.99  
5.98  
5.97  
5.96  
5.95  
5.94  
5.43  
5.42  
5.36  
5.36  
5.33  
5.33  
4.56  
4.53  
4.50  
4.47

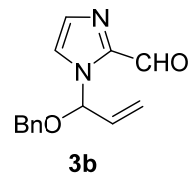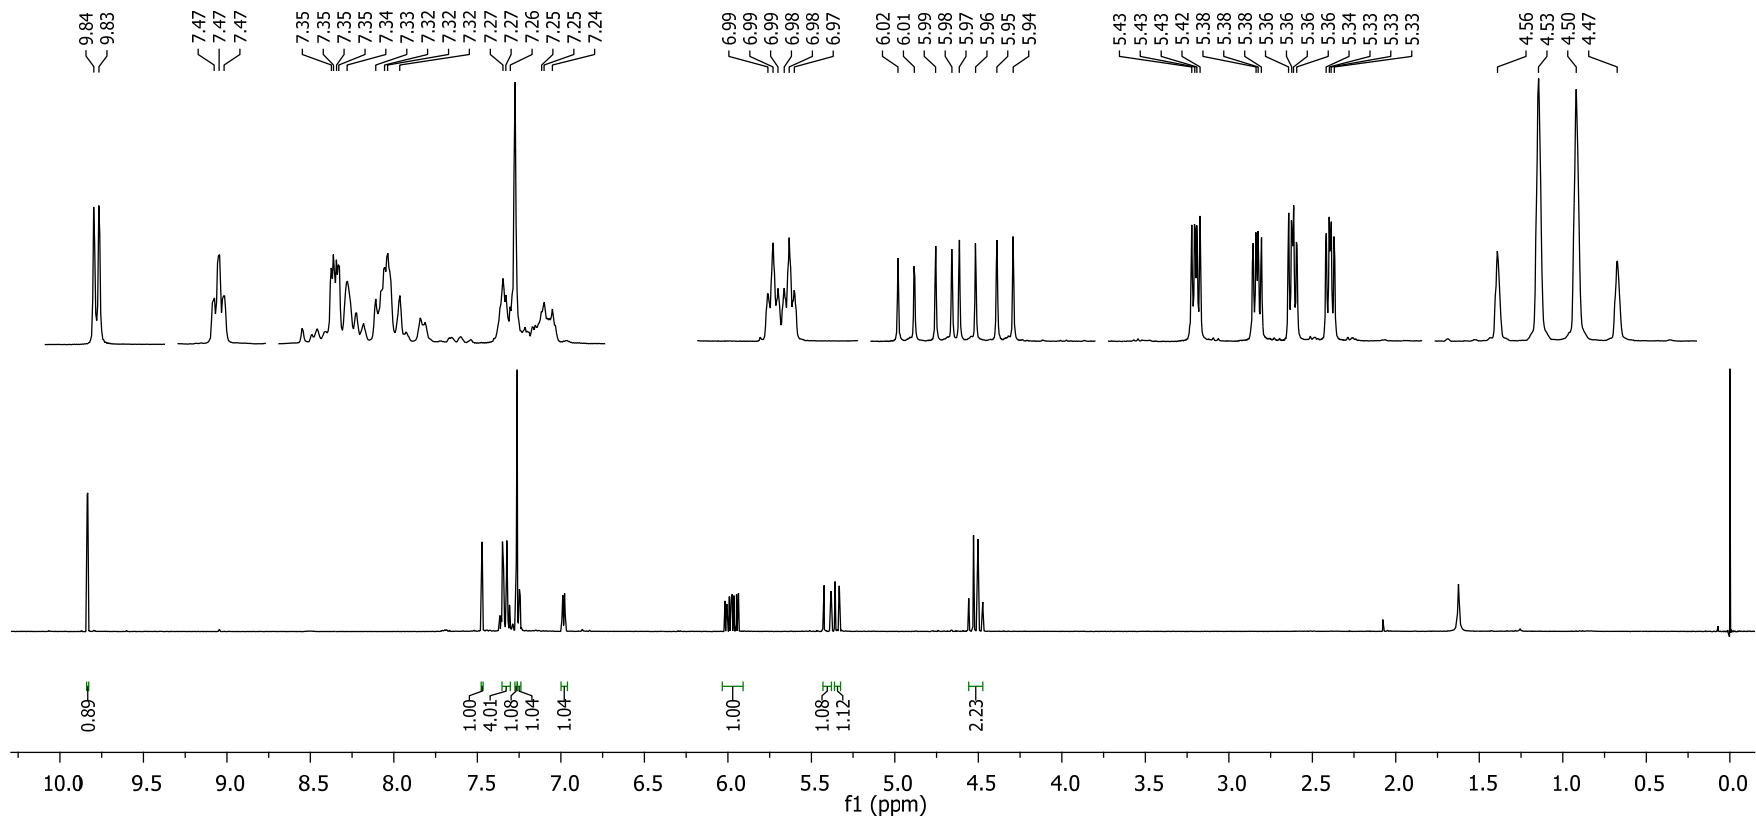

IB083-1C13\_CARBON\_01

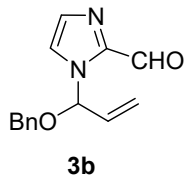

— 143.47  
/ 136.19  
/ 134.12  
/ 132.37  
/ 128.52  
/ 128.22  
/ 127.86  
— 122.66  
— 118.97

— 84.75

— 71.12

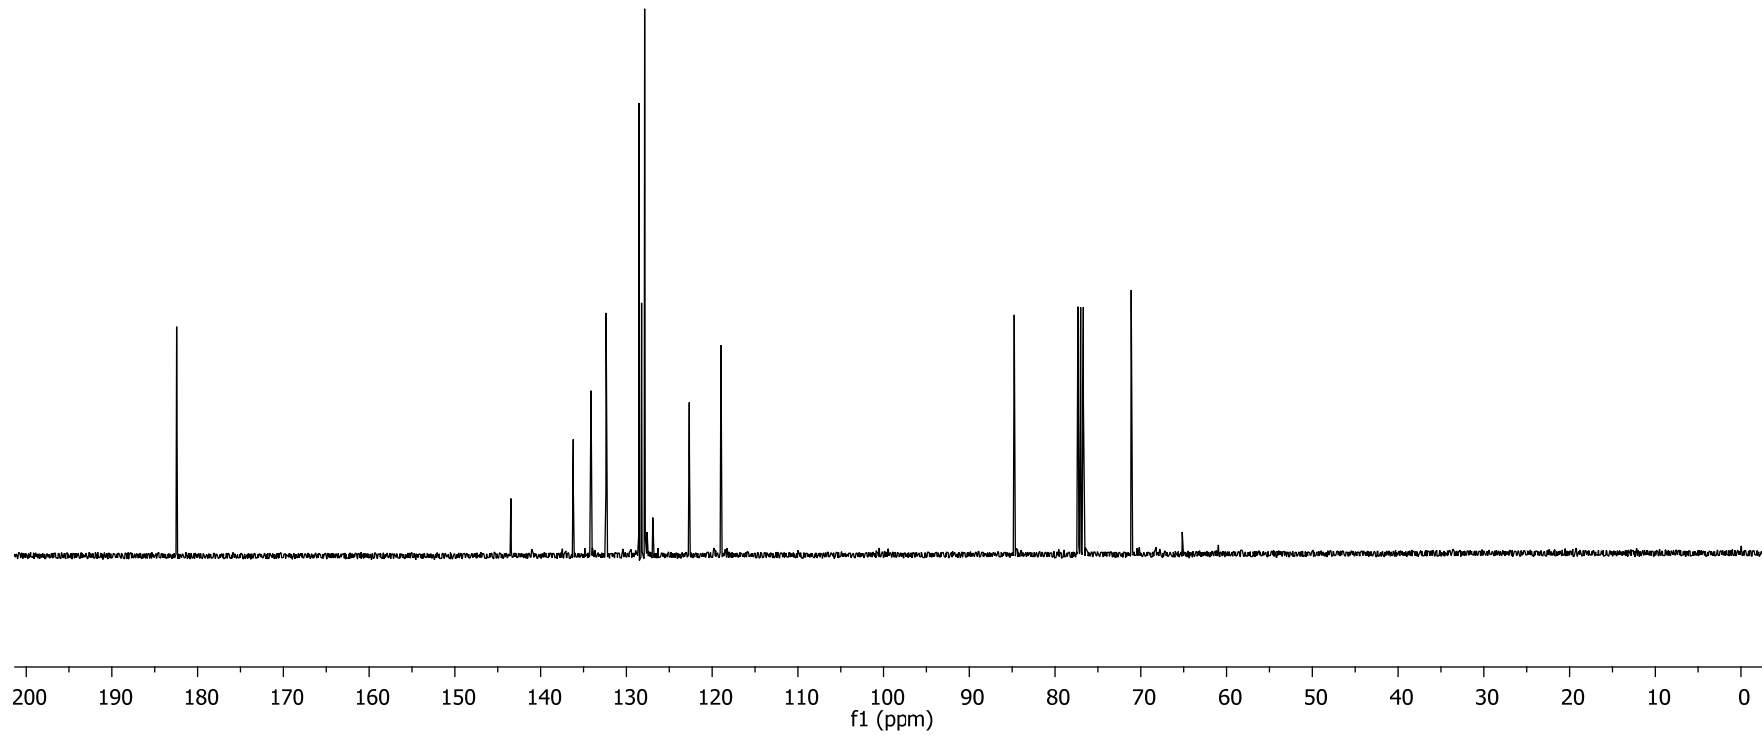

IB262-2F1Full\_PROTON\_01

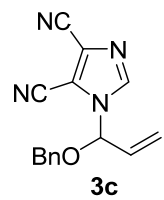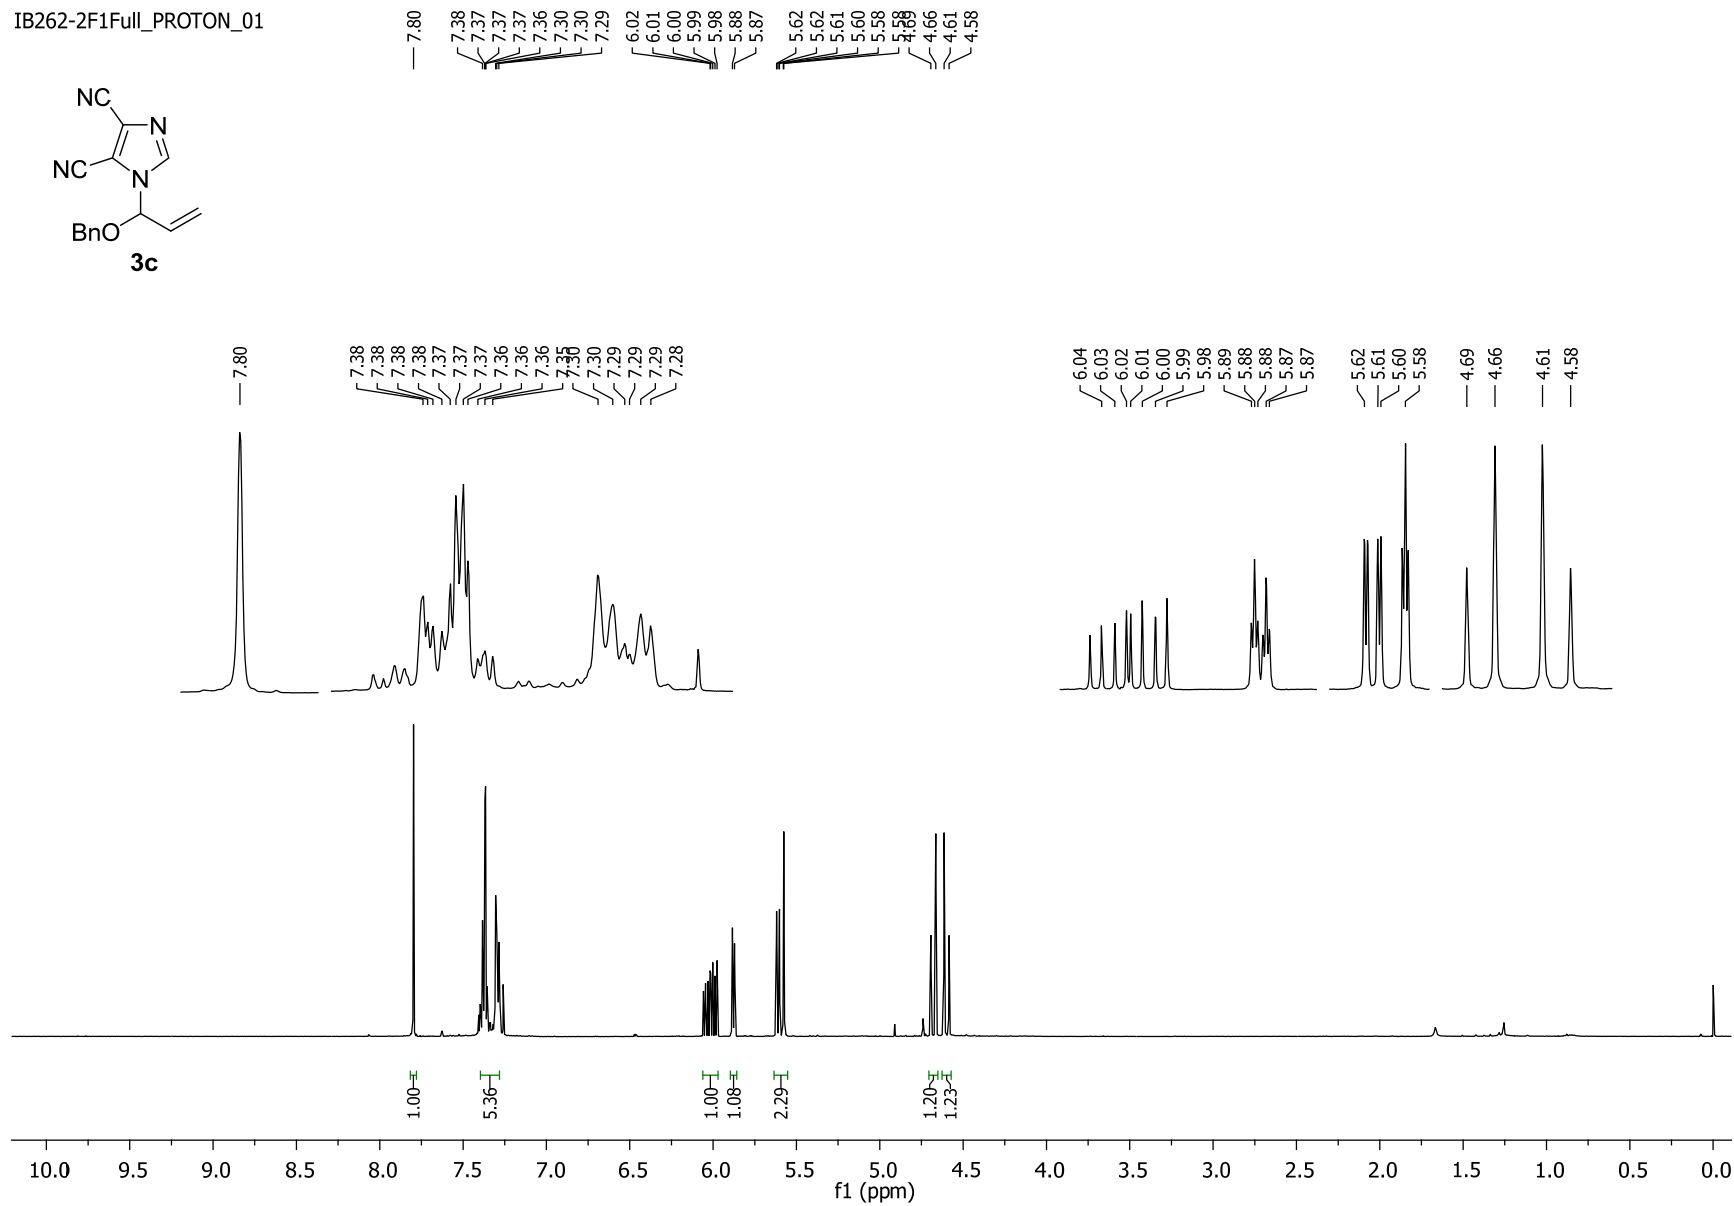

IB262-2F1Full\_CARBON\_01

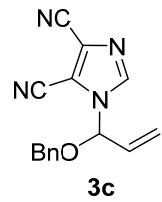

139.70  
134.57  
131.55  
128.94  
128.90  
128.07  
123.80  
122.05  
111.31  
110.66  
107.62  
86.81  
71.99

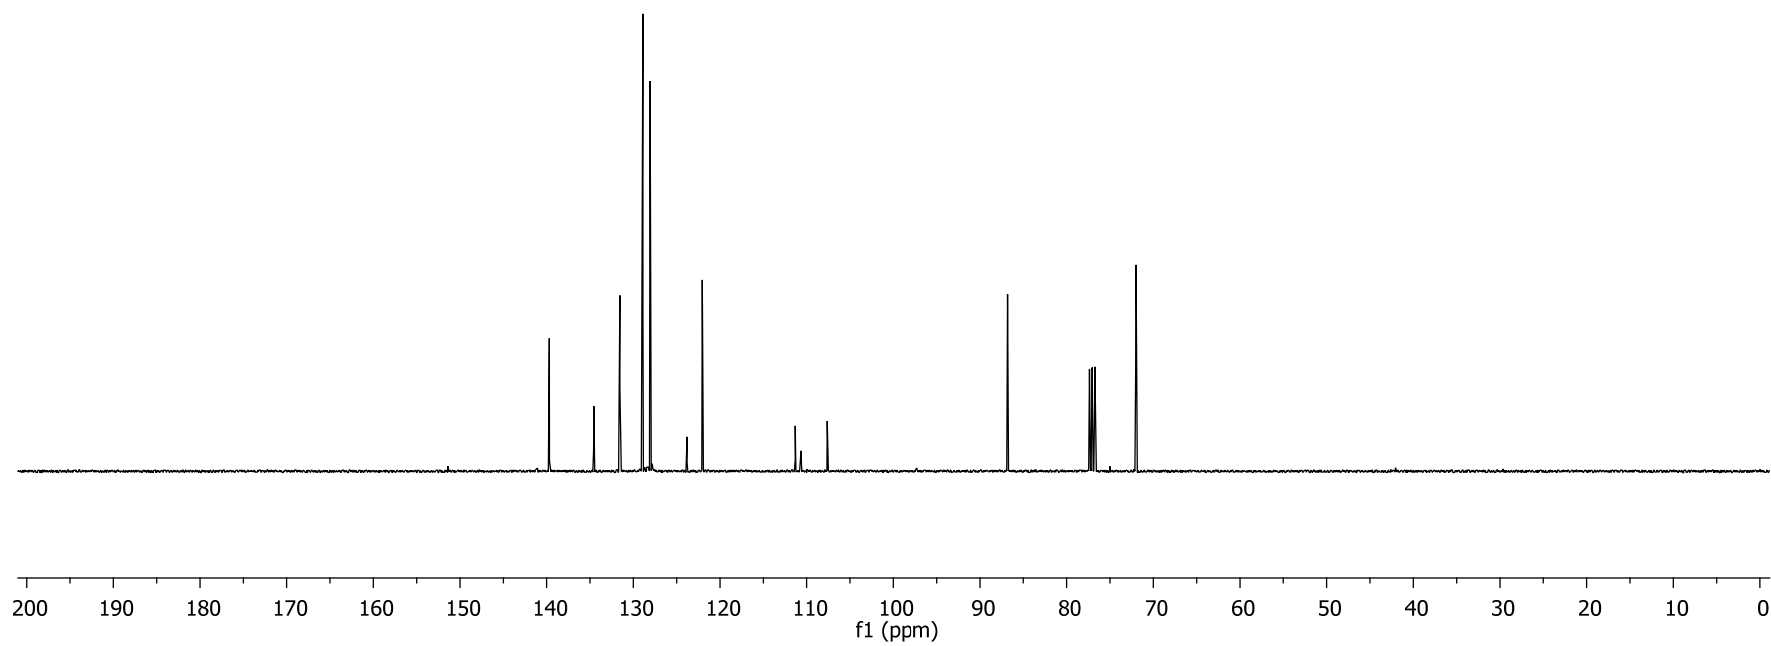

IB016\_PROTON\_01

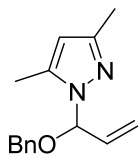

**3d**

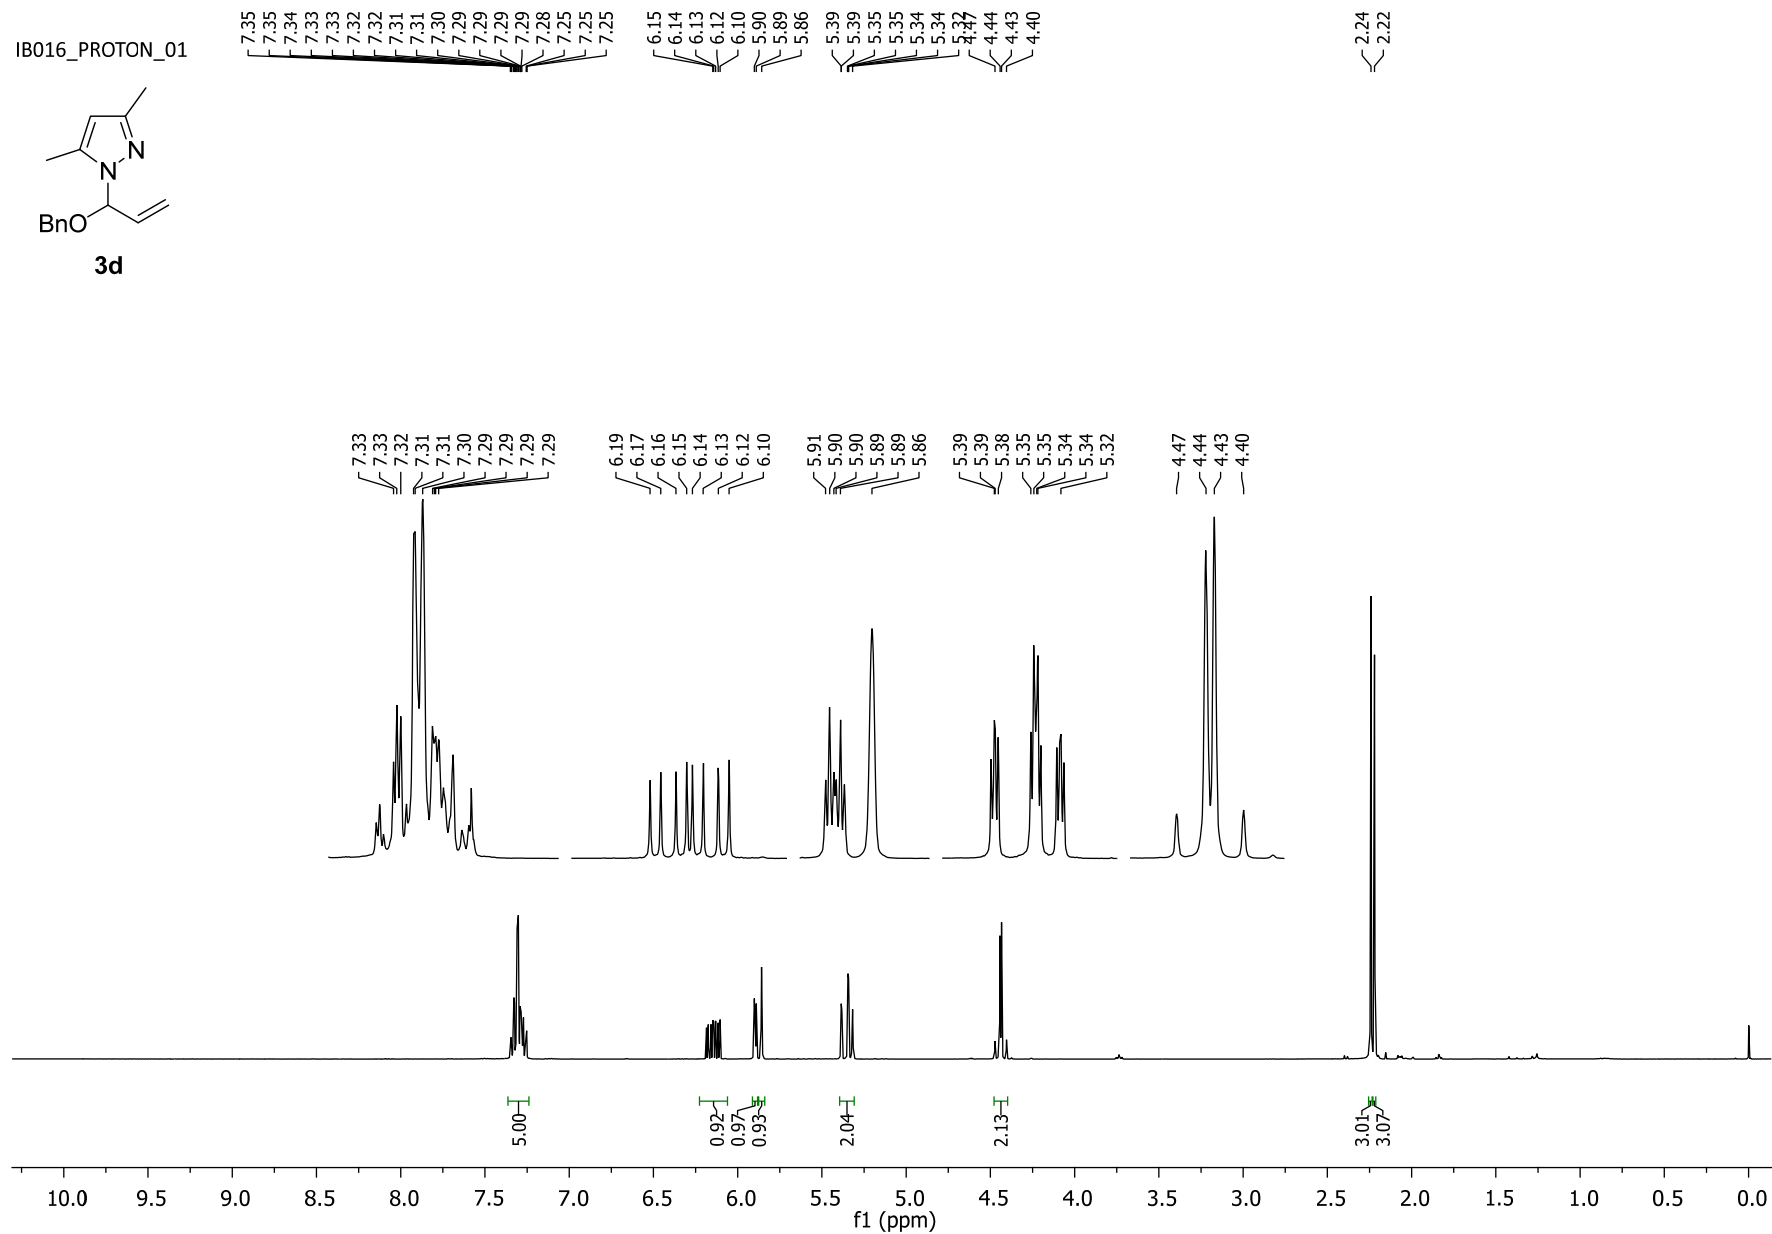

IB016\_CARBON\_01

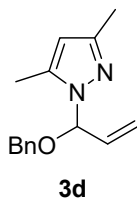

— 147.93  
— 139.63  
— 137.08  
— 134.26  
— 128.38  
— 127.82  
— 127.76  
— 118.17  
— 107.13  
— 88.20  
— 69.51  
— 13.53  
— 11.35

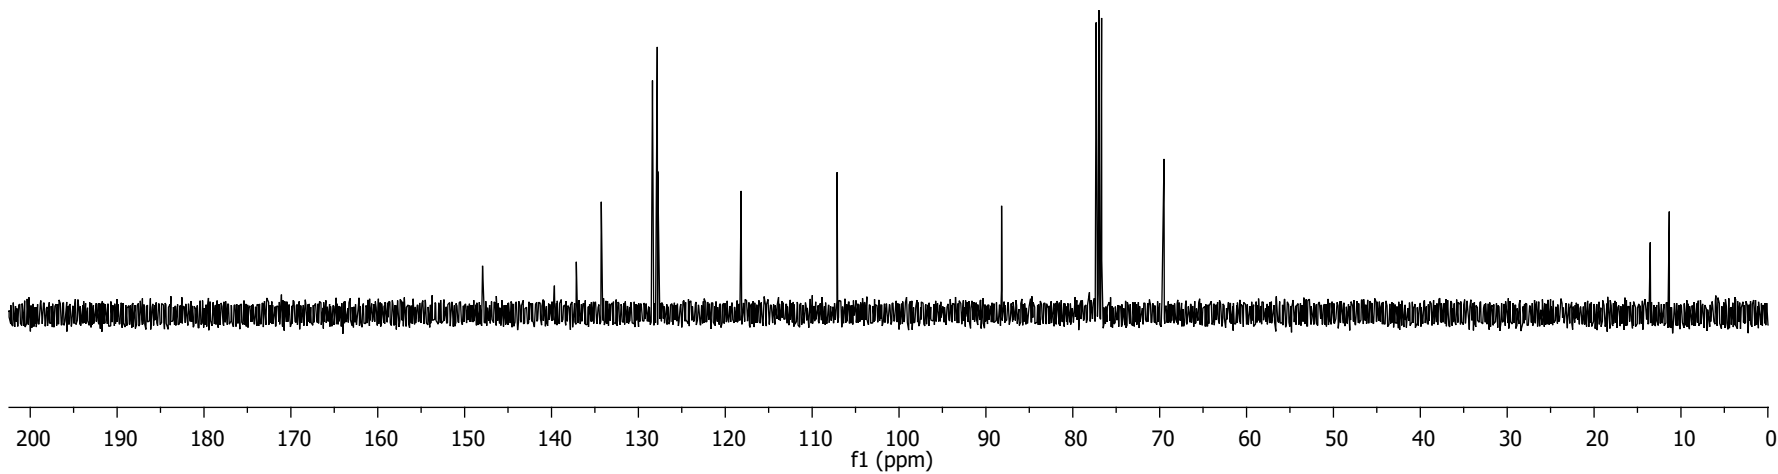

IB021-1\_PROTON\_01

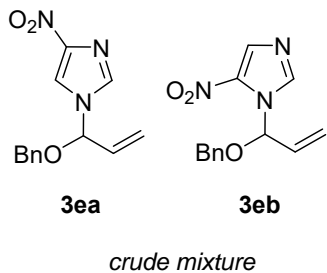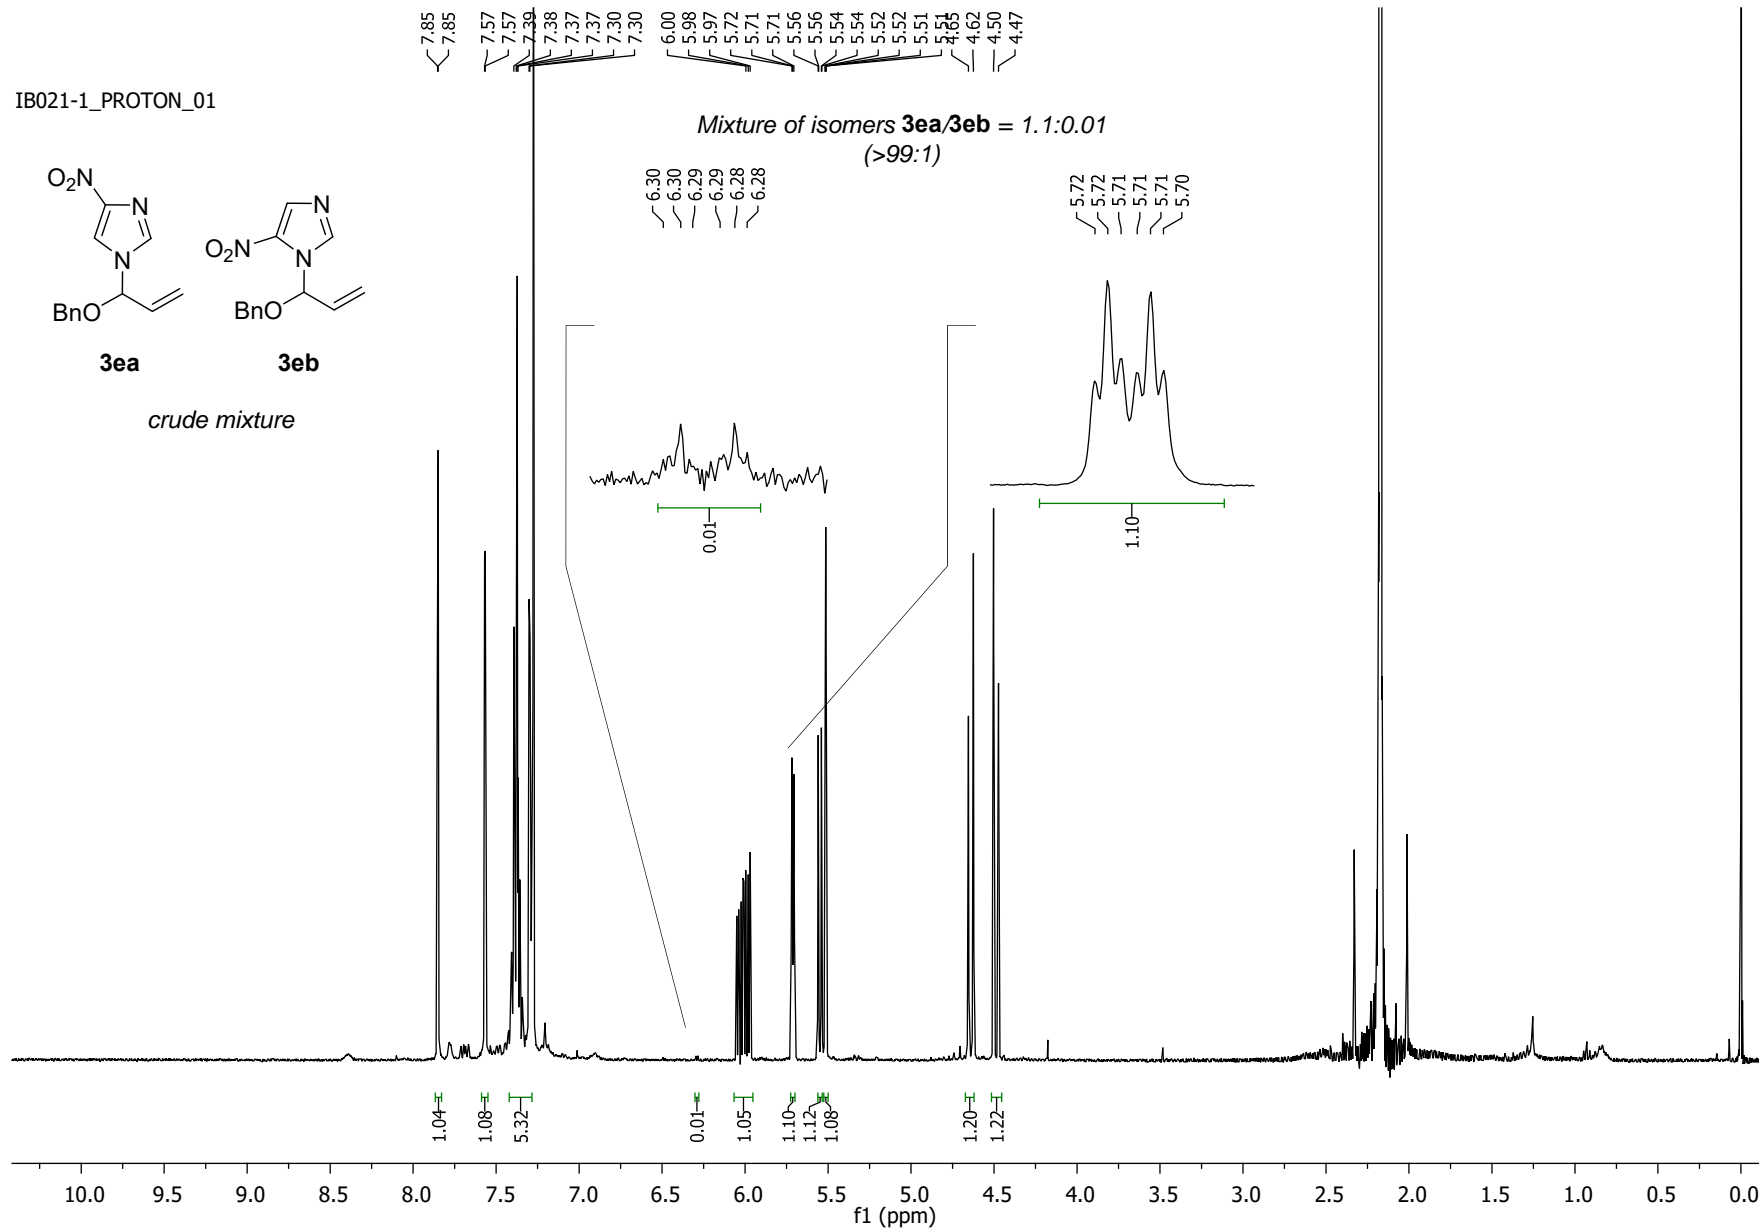

IB021\_PROTON\_01

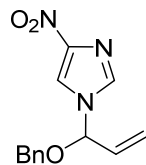

**3ea**

after purification

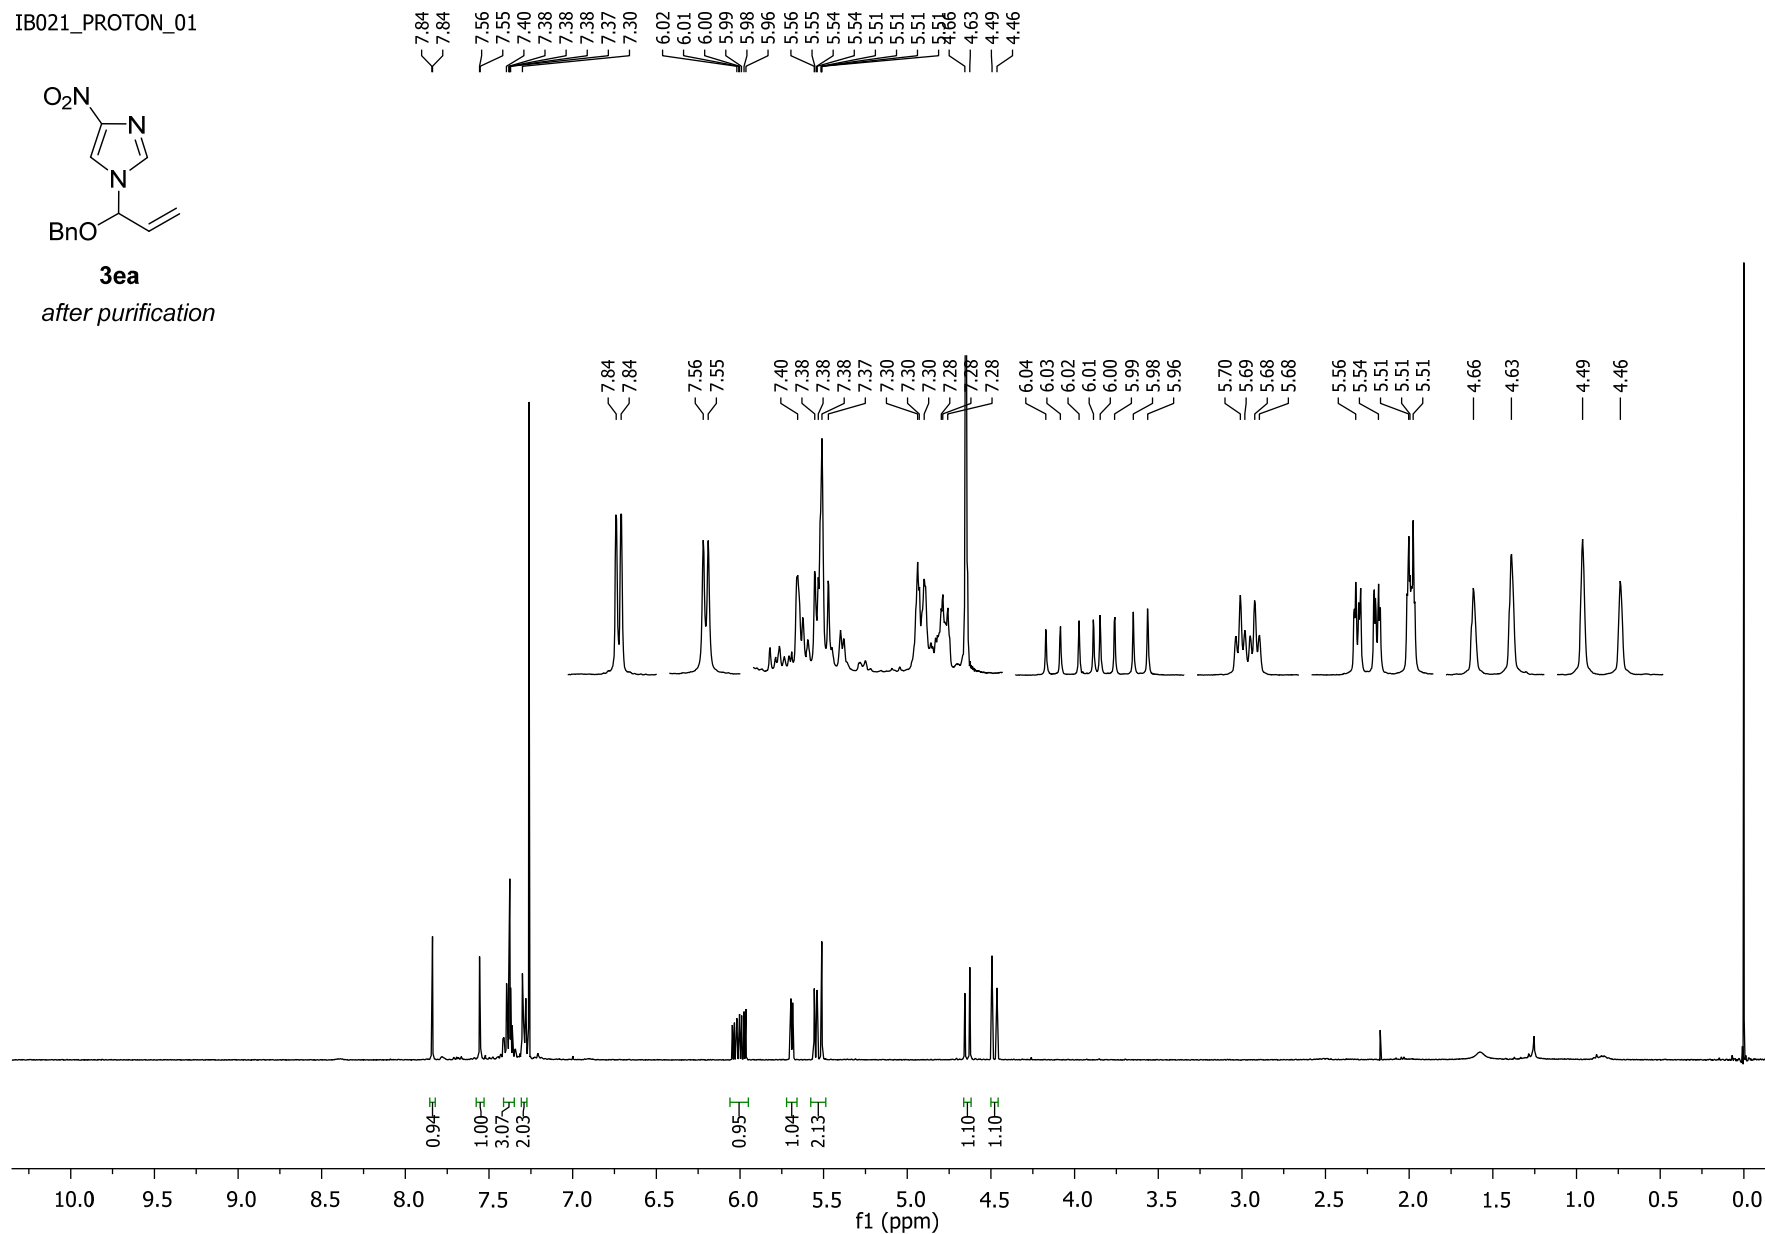



IB021\_CARBON\_01

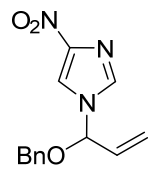

**3ea**

*after purification*

134.64  
132.67  
128.89  
128.77  
127.96  
— 120.83  
— 117.17  
— 85.75  
— 70.77

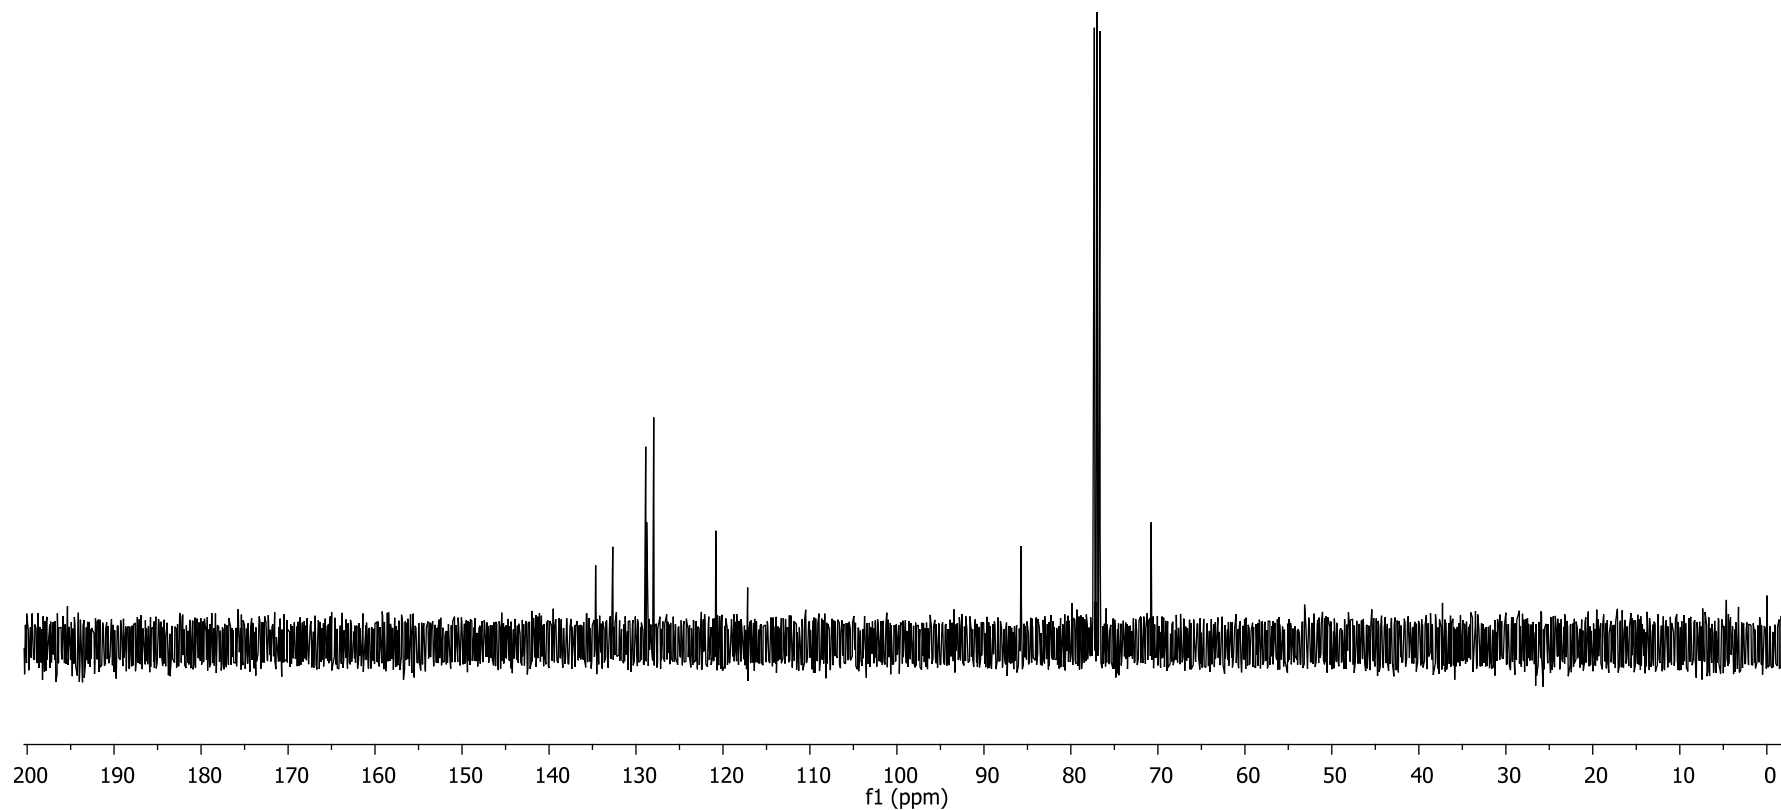

IB021  
1D Selective Gradient NOESY  
freq: 5.760ppm

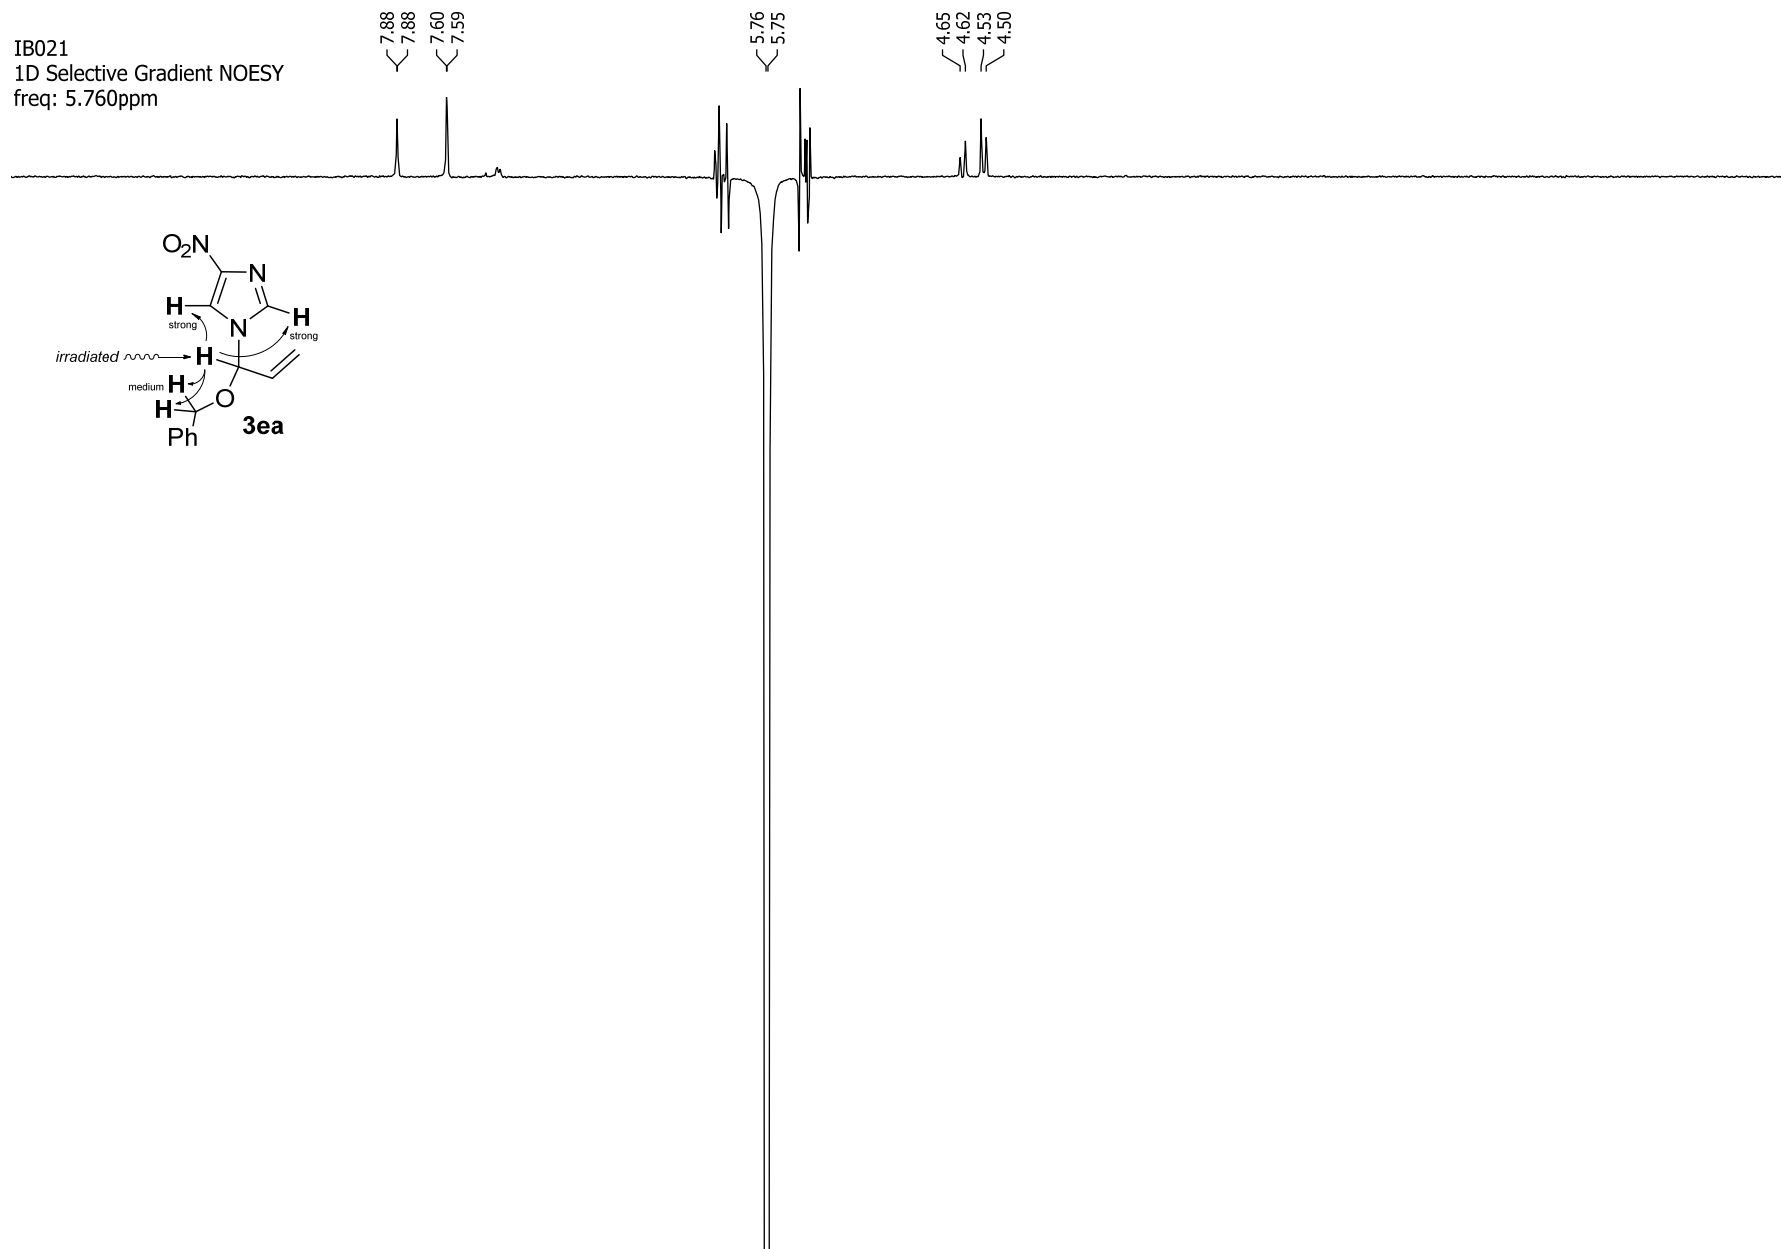

IB012-1\_PROTON\_01

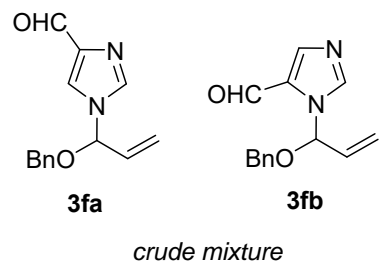

9.92  
9.78  
9.77

7.83  
7.83  
7.74  
7.74  
7.70  
7.70

7.38  
7.37  
7.37  
7.36  
7.30  
6.79  
6.76

6.04  
6.02  
6.01  
6.00  
5.99  
5.97

5.70  
5.69  
5.49  
5.49  
5.48  
5.48  
5.46  
5.45  
4.61  
4.58  
4.43  
4.40

Mixture of isomers **3fa/3fb** = 1.1:0.06  
(95:5)

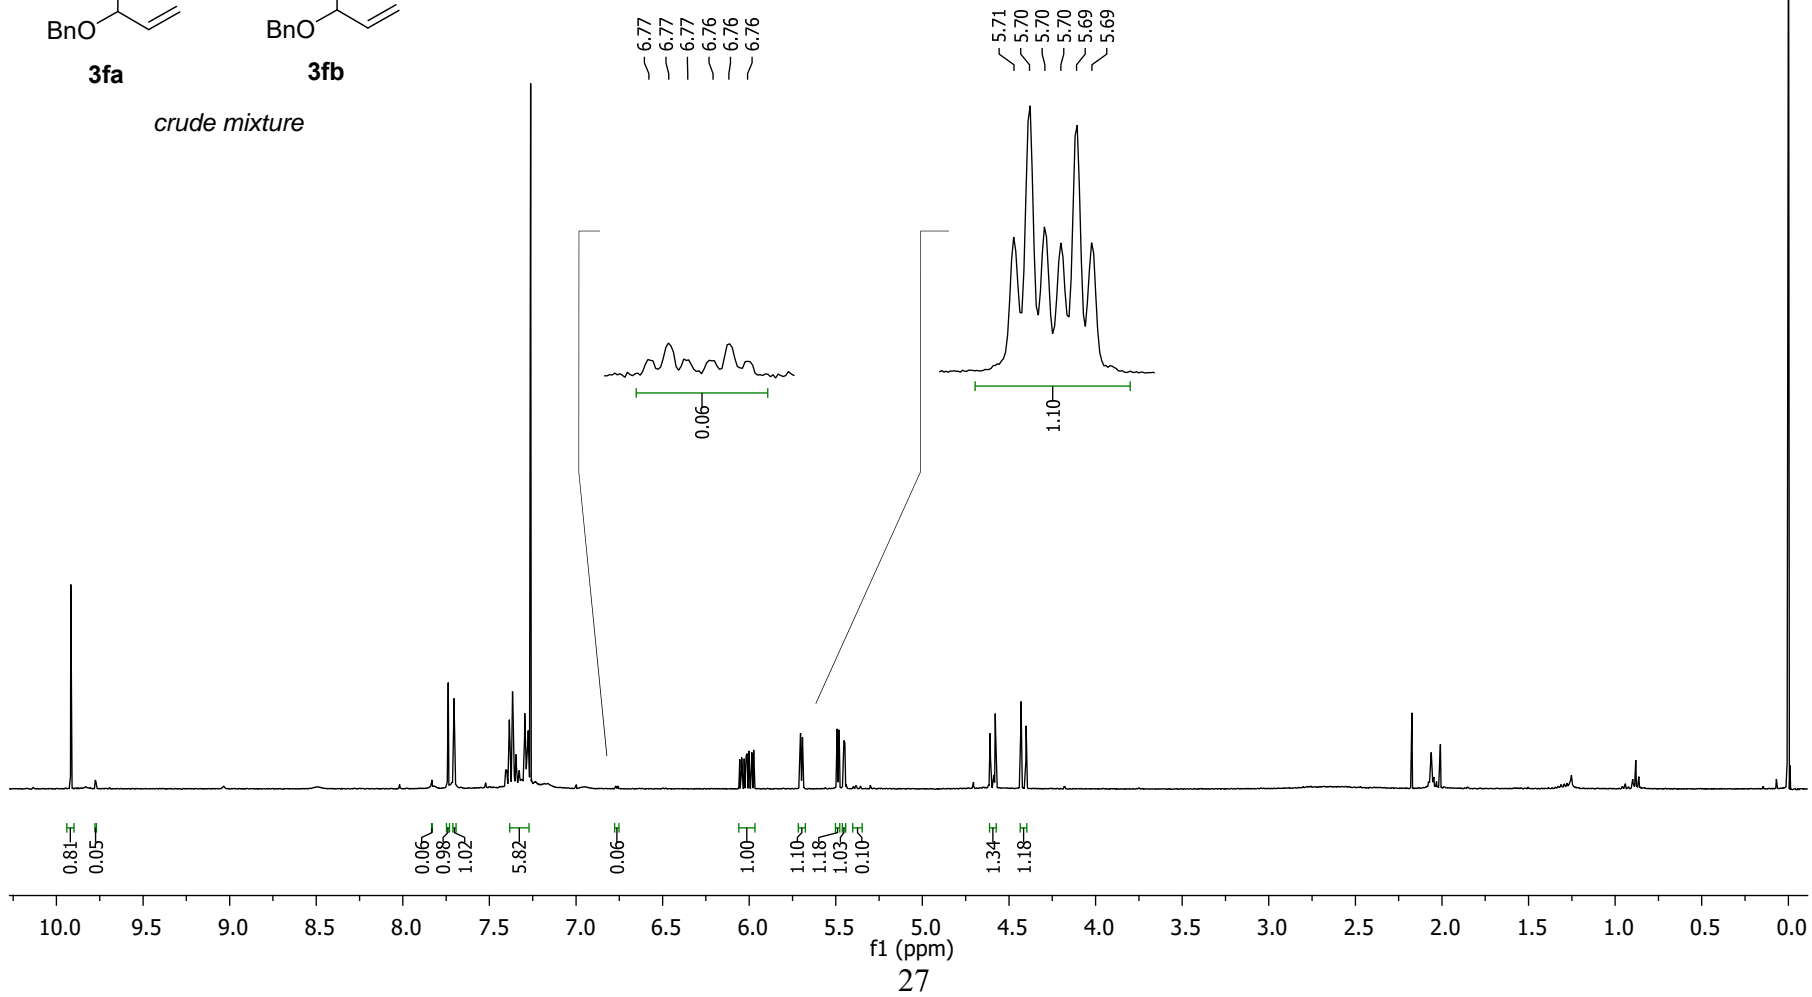

— 9.91

IB012-4\_PROTON\_01

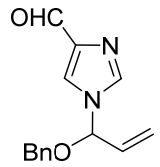

**3fa**

after purification

7.74  
7.74  
7.70  
7.70  
7.38  
7.37  
7.36  
7.30  
7.29  
7.28  
6.03  
6.02  
6.01  
6.00  
5.99  
5.98  
5.71  
5.70  
5.49  
5.49  
5.49  
5.45  
5.45  
4.61  
4.58  
4.43  
4.40

9.91  
7.74  
7.74  
7.70  
7.70  
7.38  
7.38  
7.37  
7.37  
7.36  
7.35  
7.30  
7.29  
7.28  
7.28  
7.27  
7.27  
6.06  
6.04  
6.03  
6.02  
6.01  
6.00  
5.99  
5.98  
5.71  
5.71  
5.70  
5.70  
5.70  
5.49  
5.49  
5.49  
5.45  
5.45  
5.45  
4.61  
4.58  
4.43  
4.40

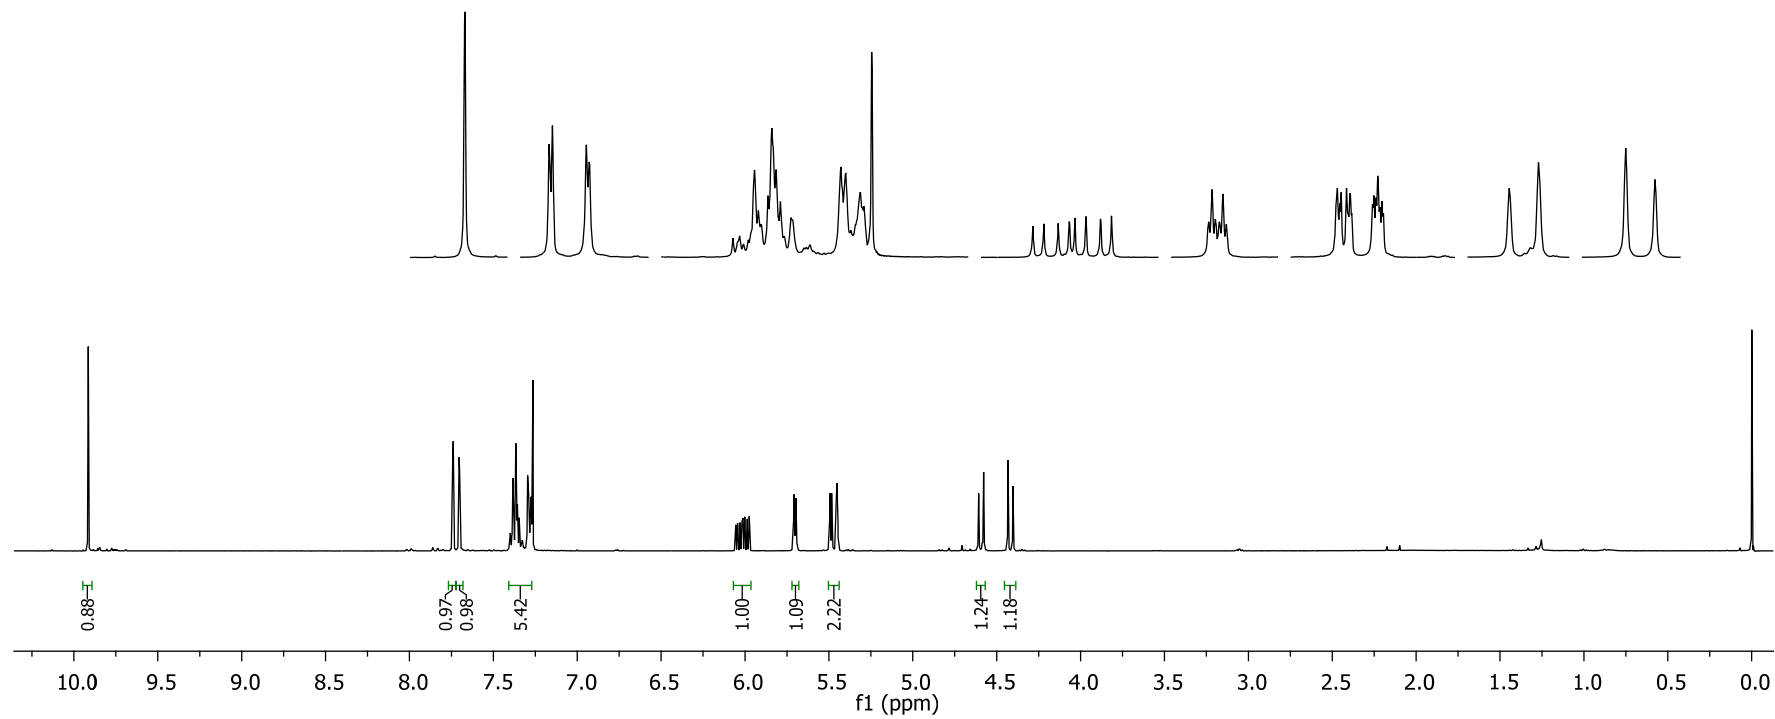

186.22  
|  
IB012-4\_CARBON\_01

142.58  
|  
141.31  
|  
137.45  
|  
135.49  
|  
133.24  
|  
128.79  
|  
128.57  
|  
127.93  
|  
122.47  
|  
120.12

85.17  
|

70.38  
|

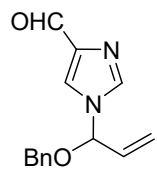

**3fa**  
*after purification*

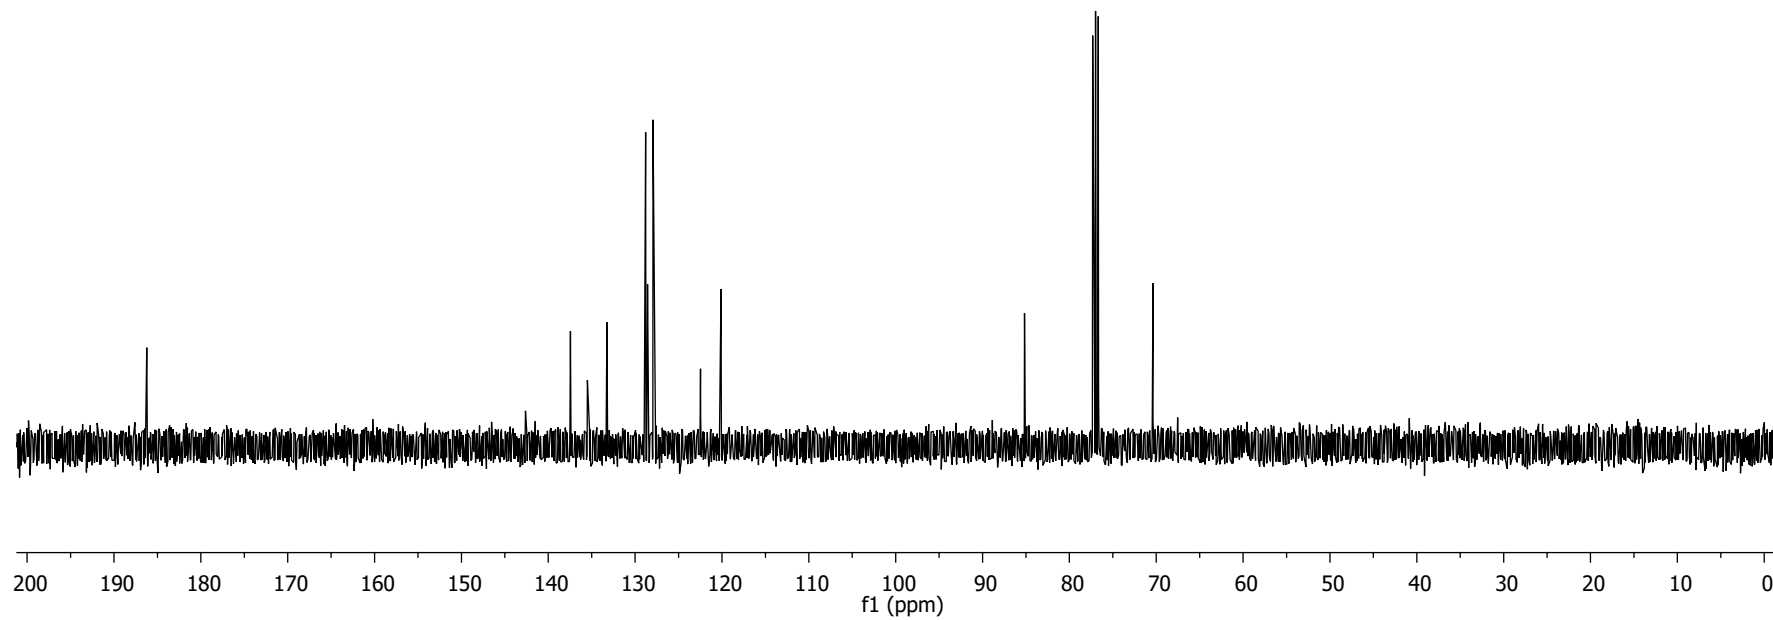

IB012  
1D Selective Gradient NOESY  
freq: 7.757ppm

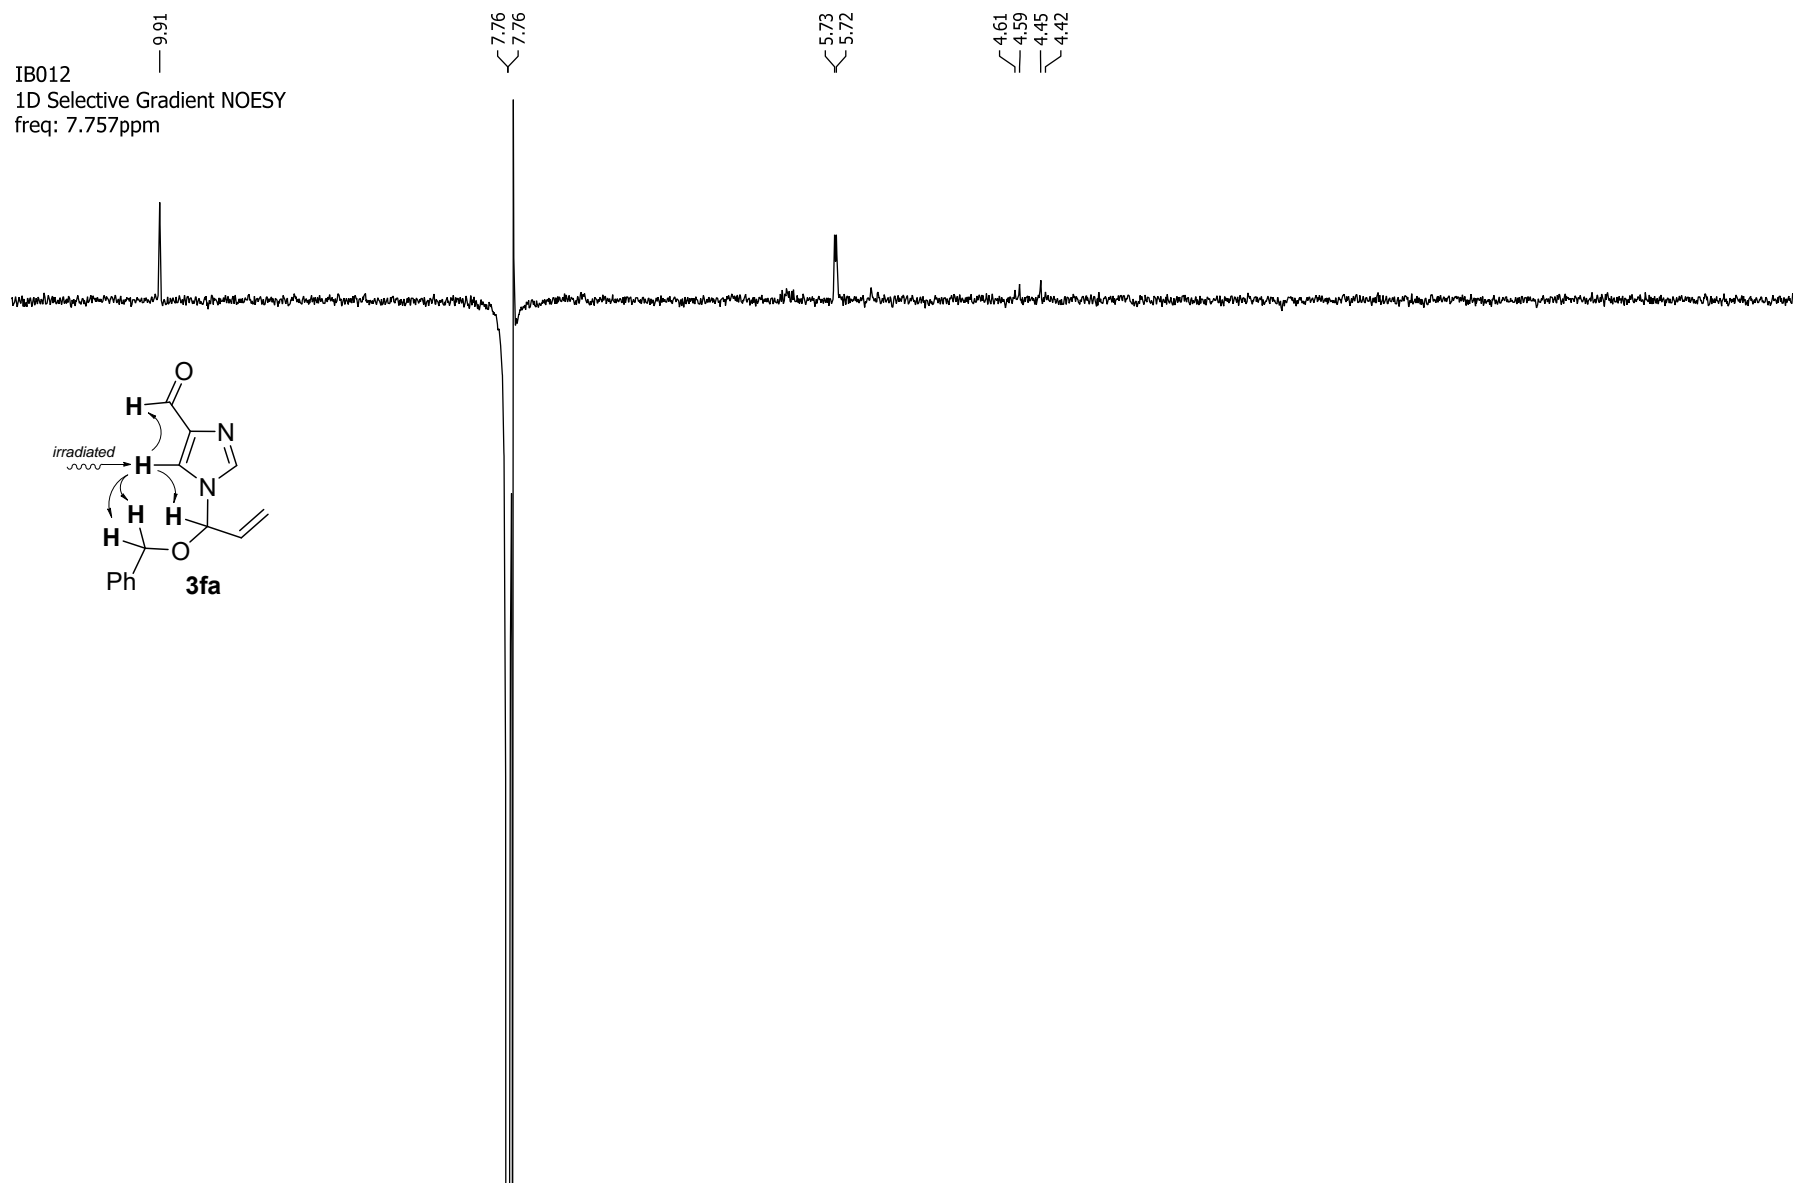

IB010-1

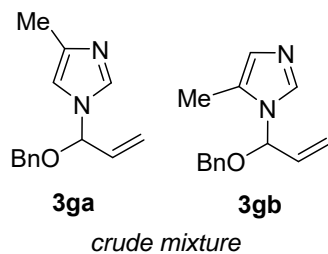

Mixture of isomers **3ga/3gb** = 1:0.5  
(67:33)

7.54  
7.39  
7.36  
7.35  
7.34  
7.32  
7.30  
7.28  
7.28  
6.86  
6.78  
6.07  
6.05  
6.04  
6.02  
6.00  
5.98  
5.59  
5.46  
5.40  
5.40  
5.40  
5.37  
5.38  
5.38  
4.56  
4.54  
4.52  
4.39  
4.38  
4.35  
4.34  
2.27  
2.27  
2.20  
2.20

5.68  
5.67  
5.67  
5.66  
5.66  
5.60  
5.59  
5.59  
5.58  
5.58  
5.58

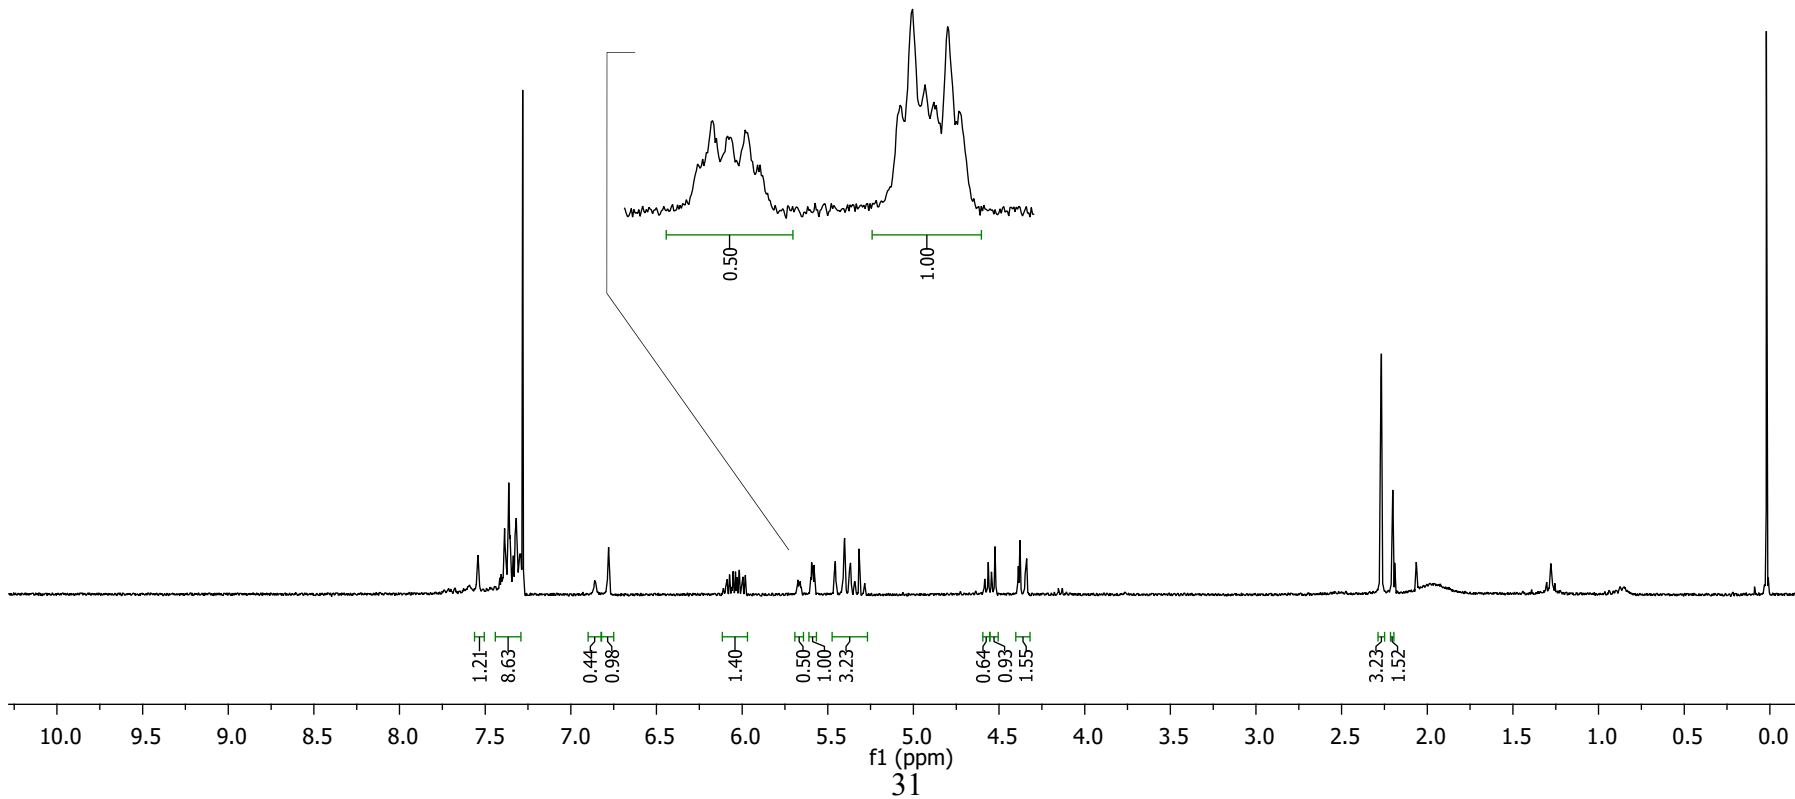

IB010-4\_PROTON\_01

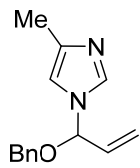

**3ga**

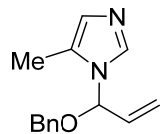

**3gb**

after purification  
mixture of isomers **3ga/3gb** = 1:0.5  
(67:33)

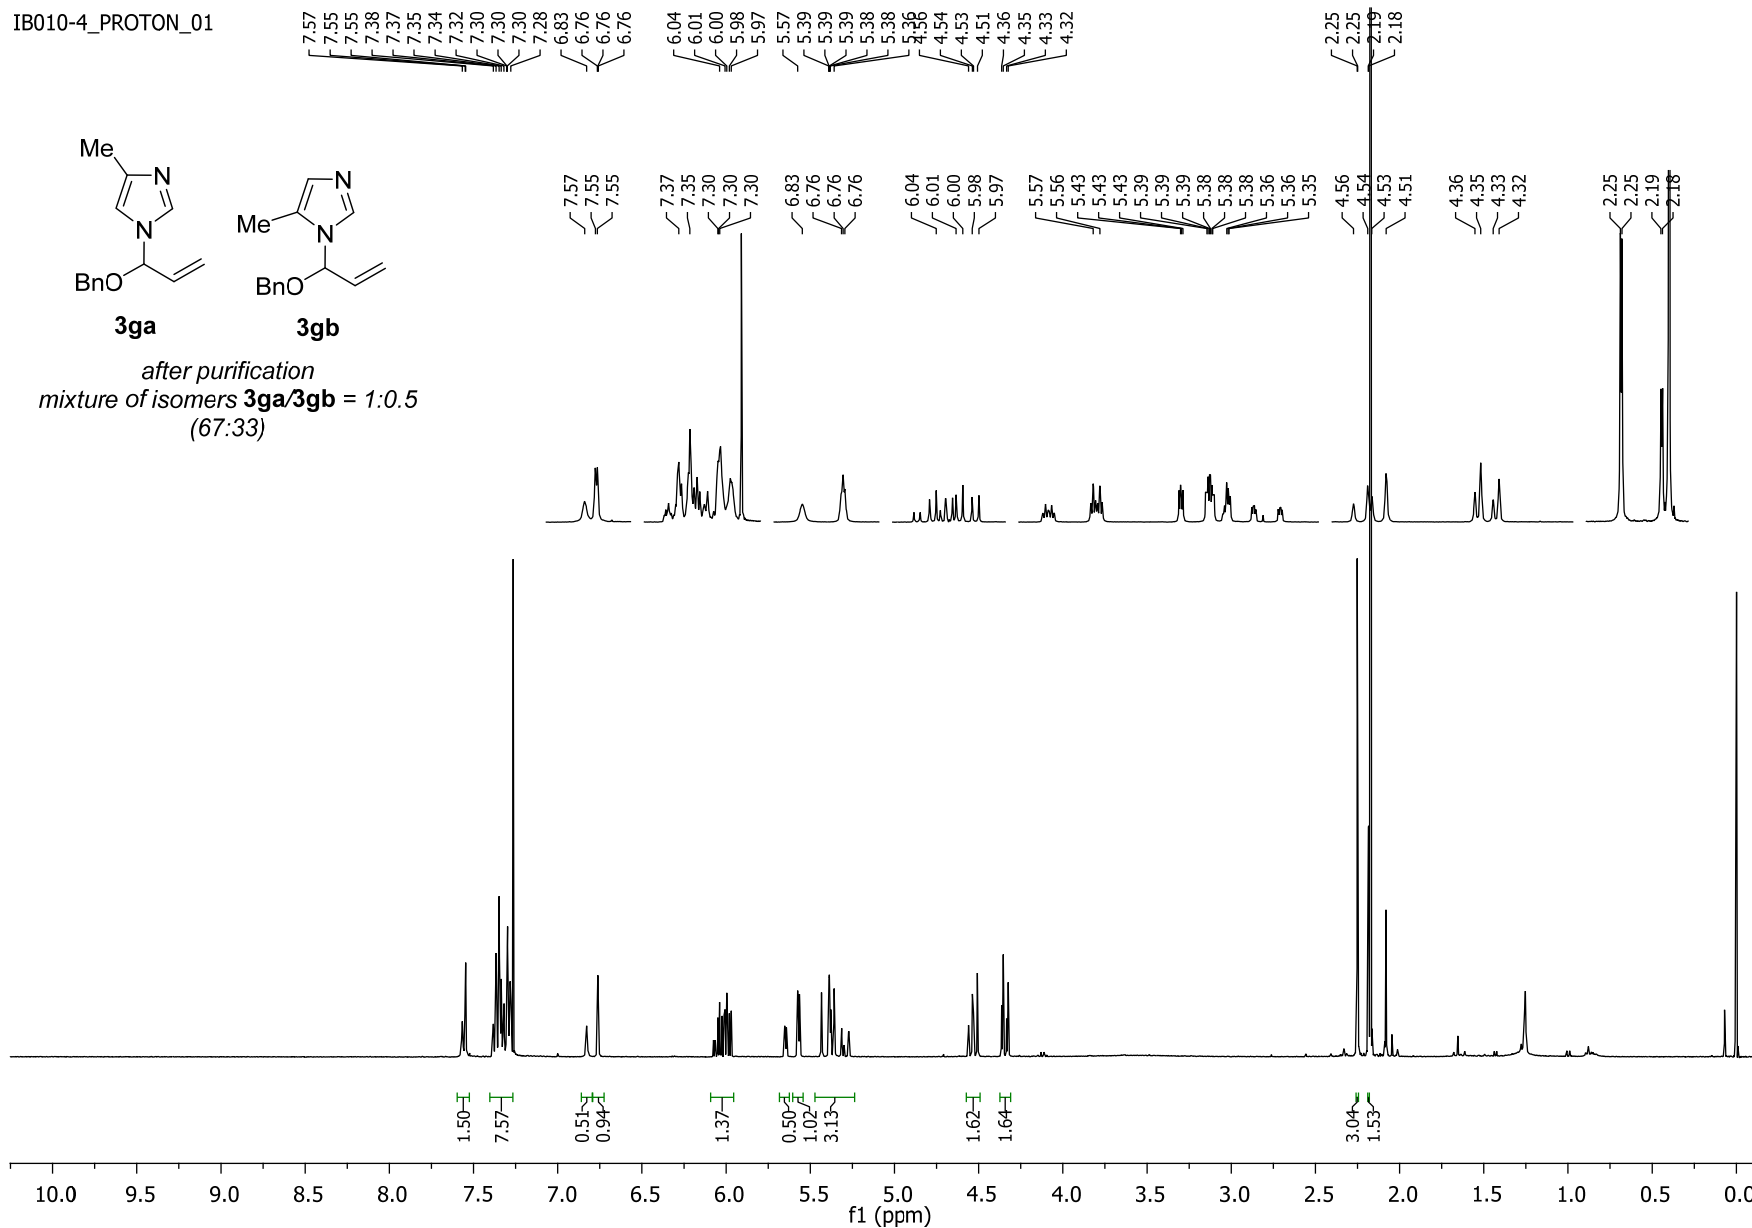



IB010-F1\_CARBON\_01

138.99  
136.34  
136.22  
135.51  
134.32  
134.23  
128.61  
128.58  
128.21  
128.15  
127.92  
127.86  
127.73  
118.82  
118.78  
— 113.17

84.28  
83.71

69.63  
69.53

— 13.72  
— 9.86

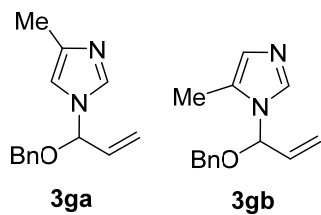

after purification  
mixture of isomers **3ga/3gb** = 1:0.5  
(67:33)

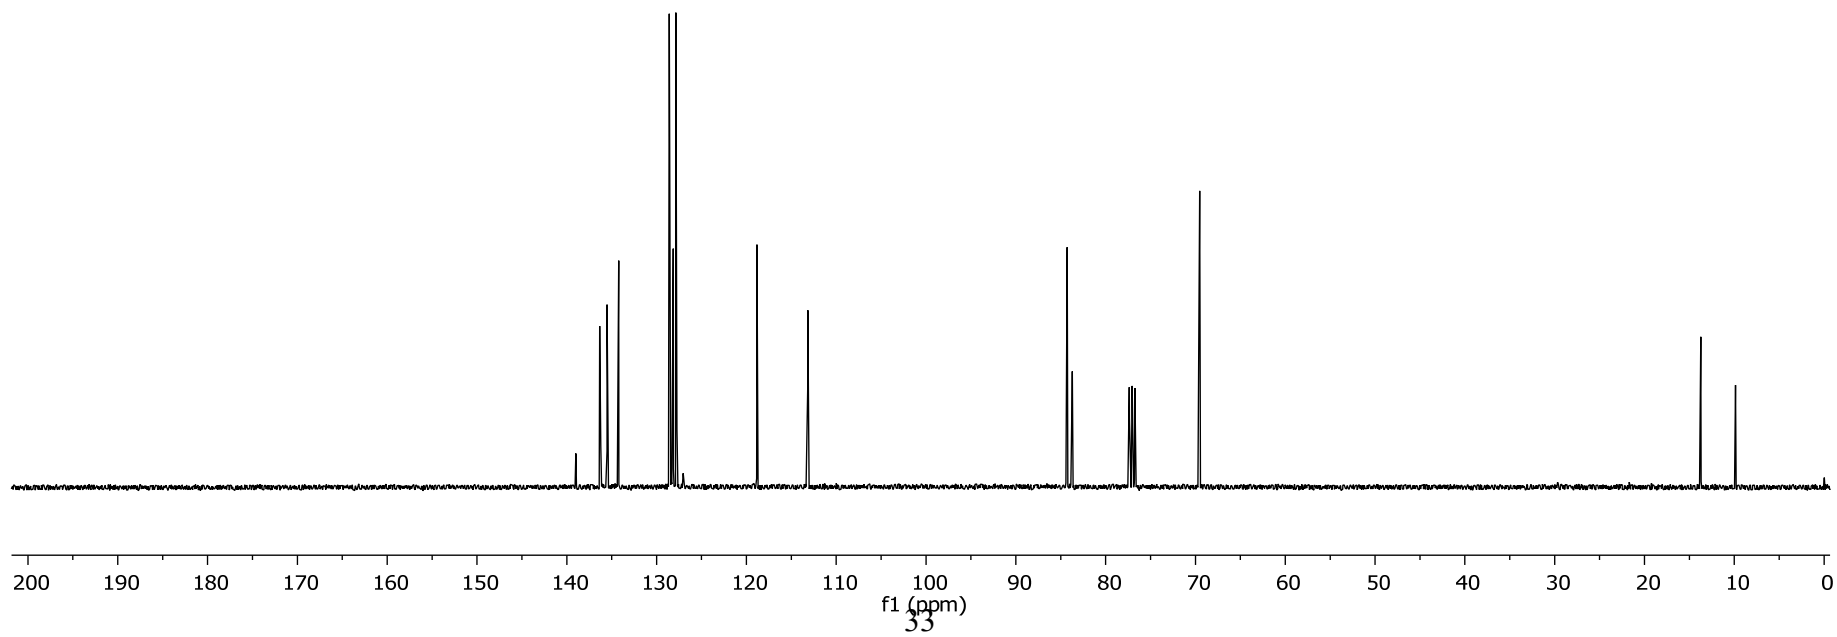

1D Selective Gradient NOESY  
freq: 6.770ppm

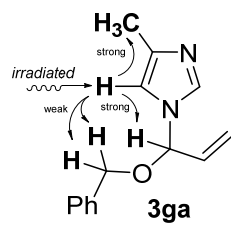

7.36  
7.31  
7.29

6.06  
6.05  
6.03  
6.02  
6.00  
5.99  
5.98  
5.58  
5.57

4.54  
4.51  
4.36  
4.33

2.26

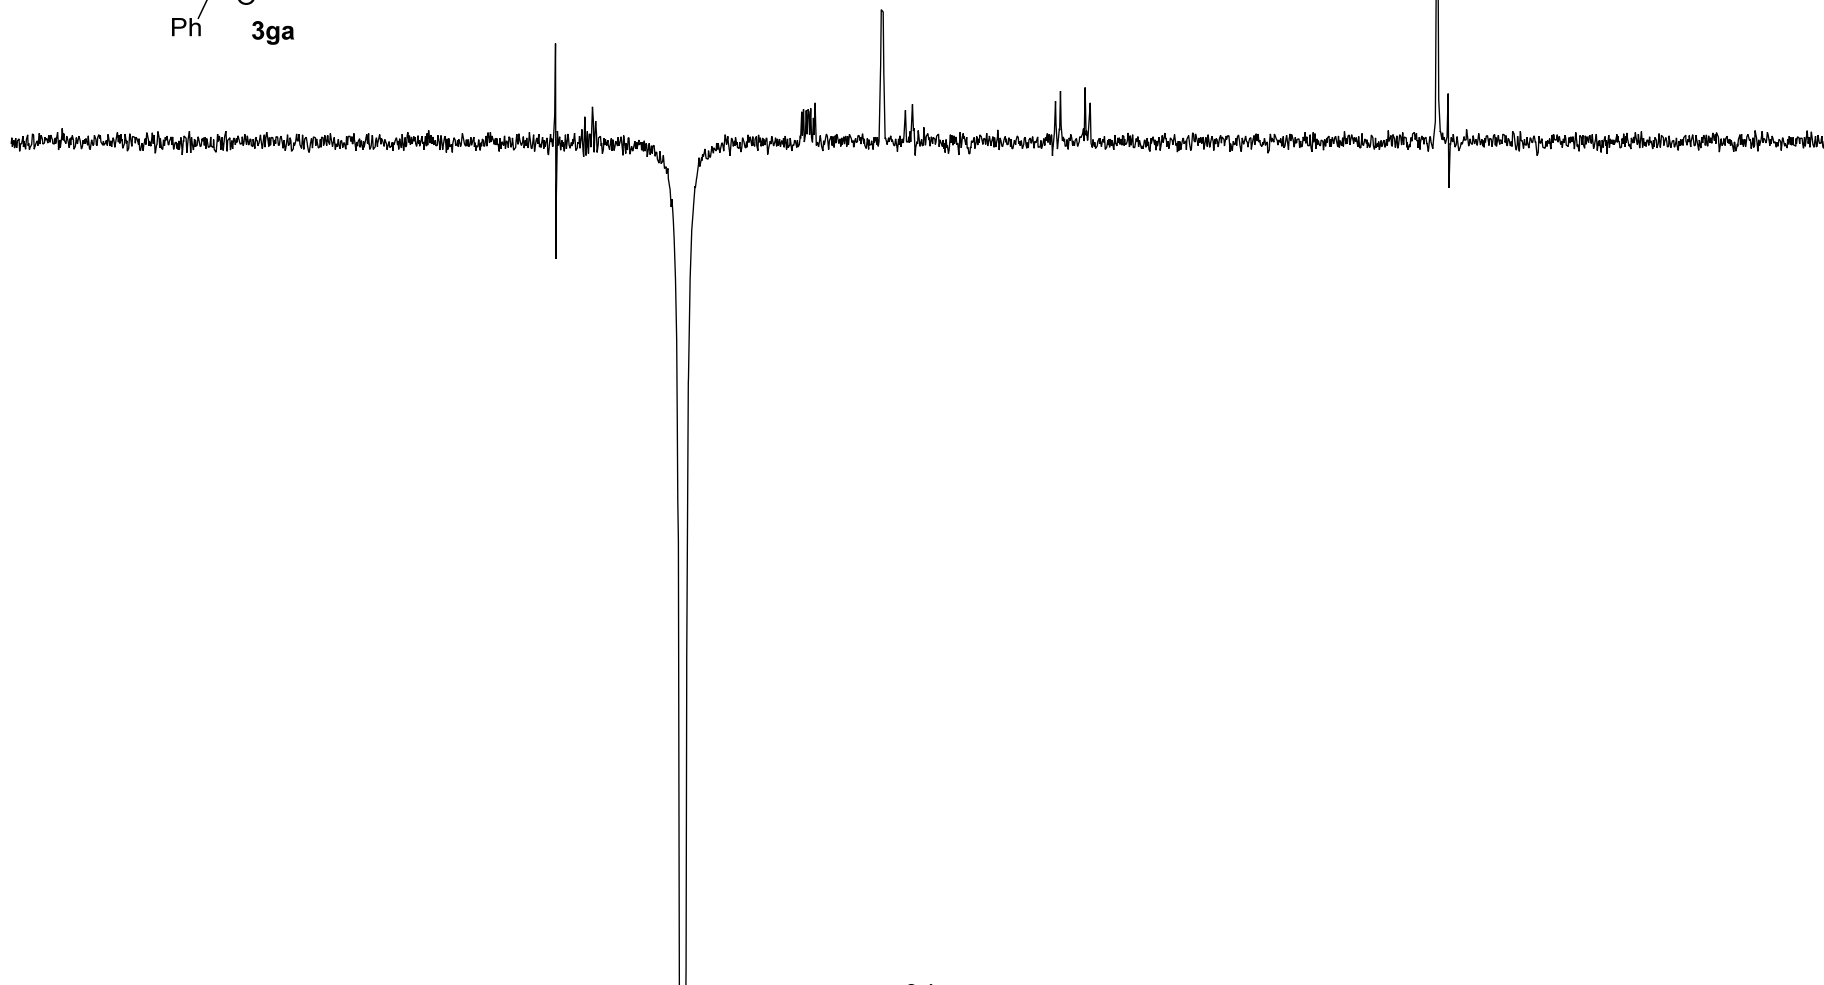

1D Selective Gradient NOESY  
freq: 6.825ppm

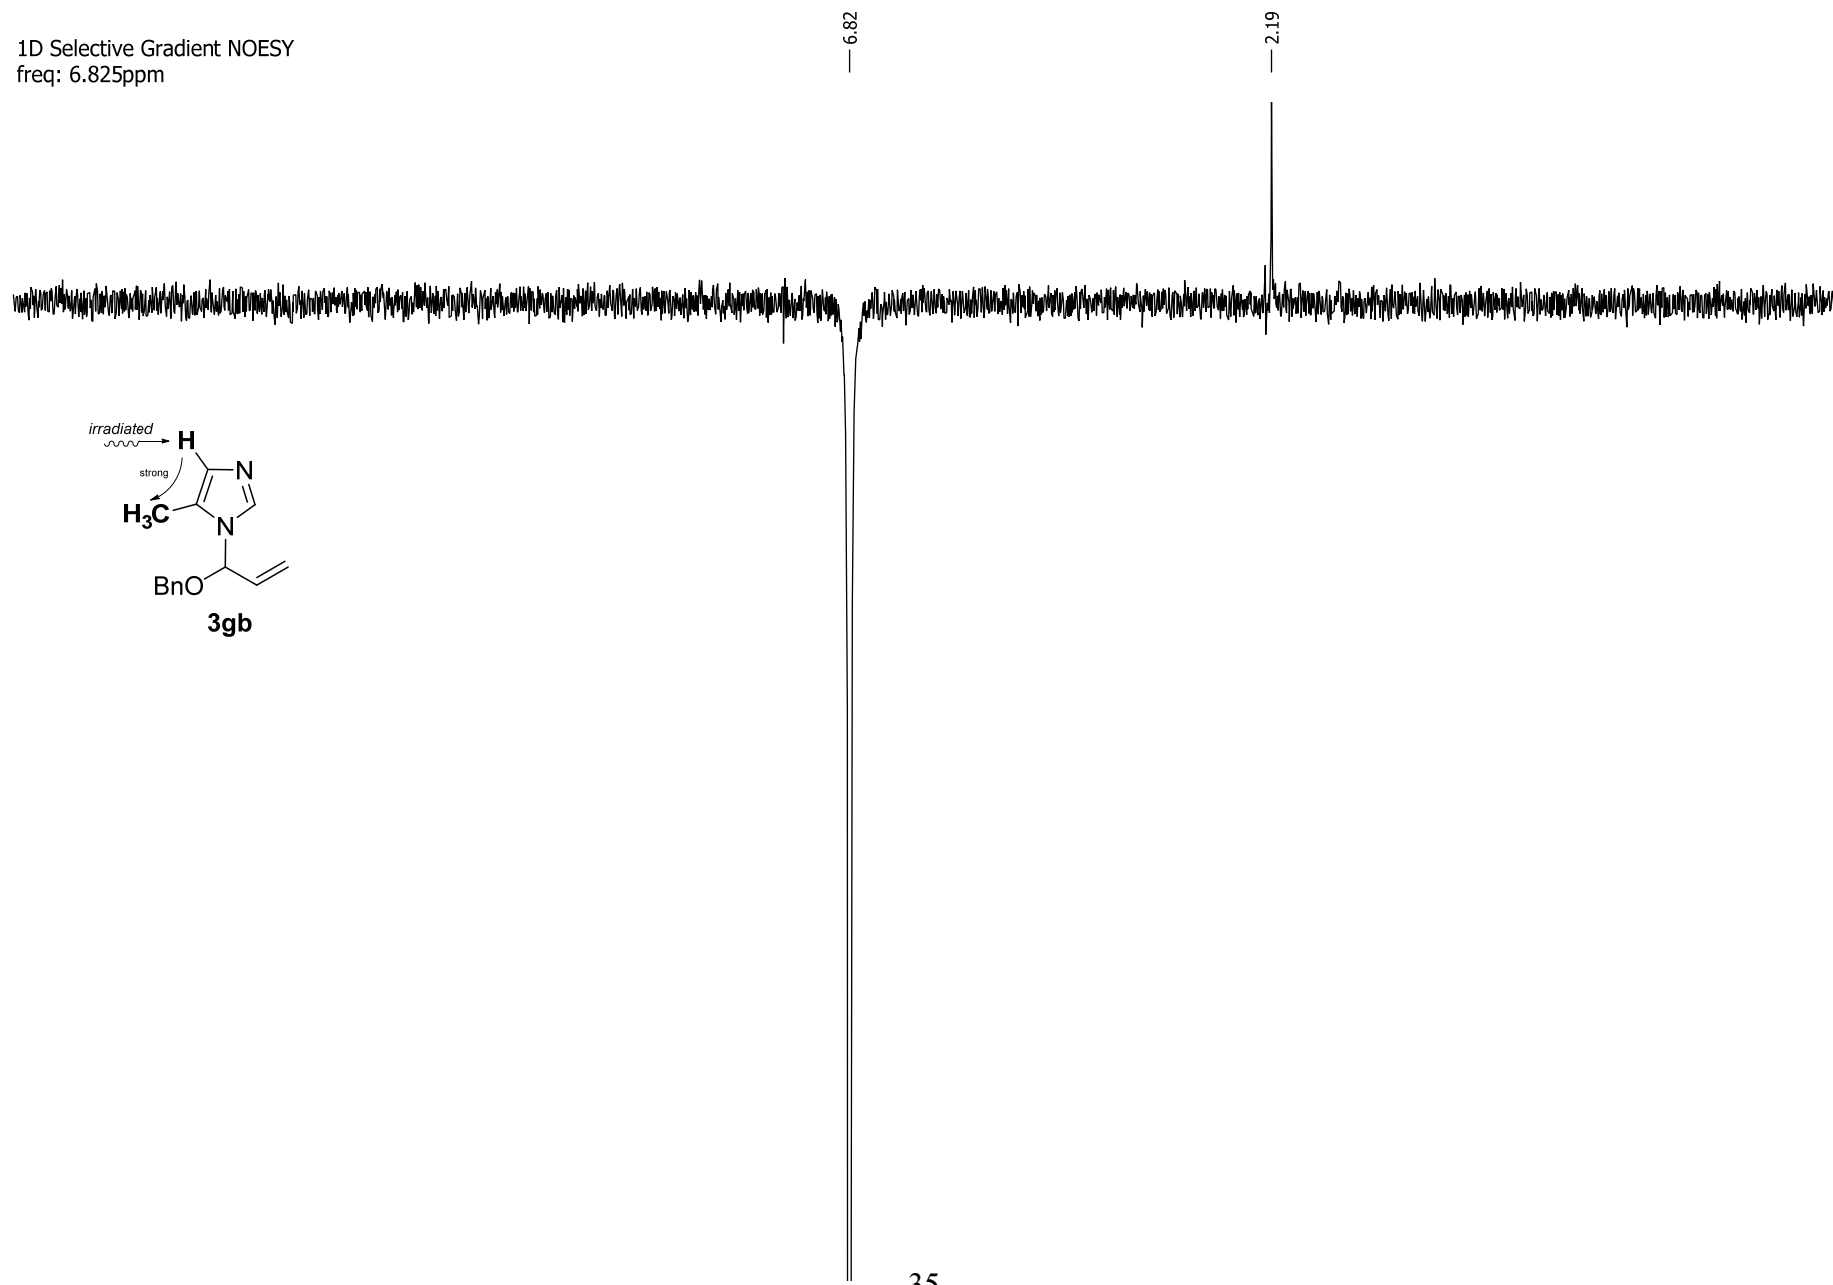

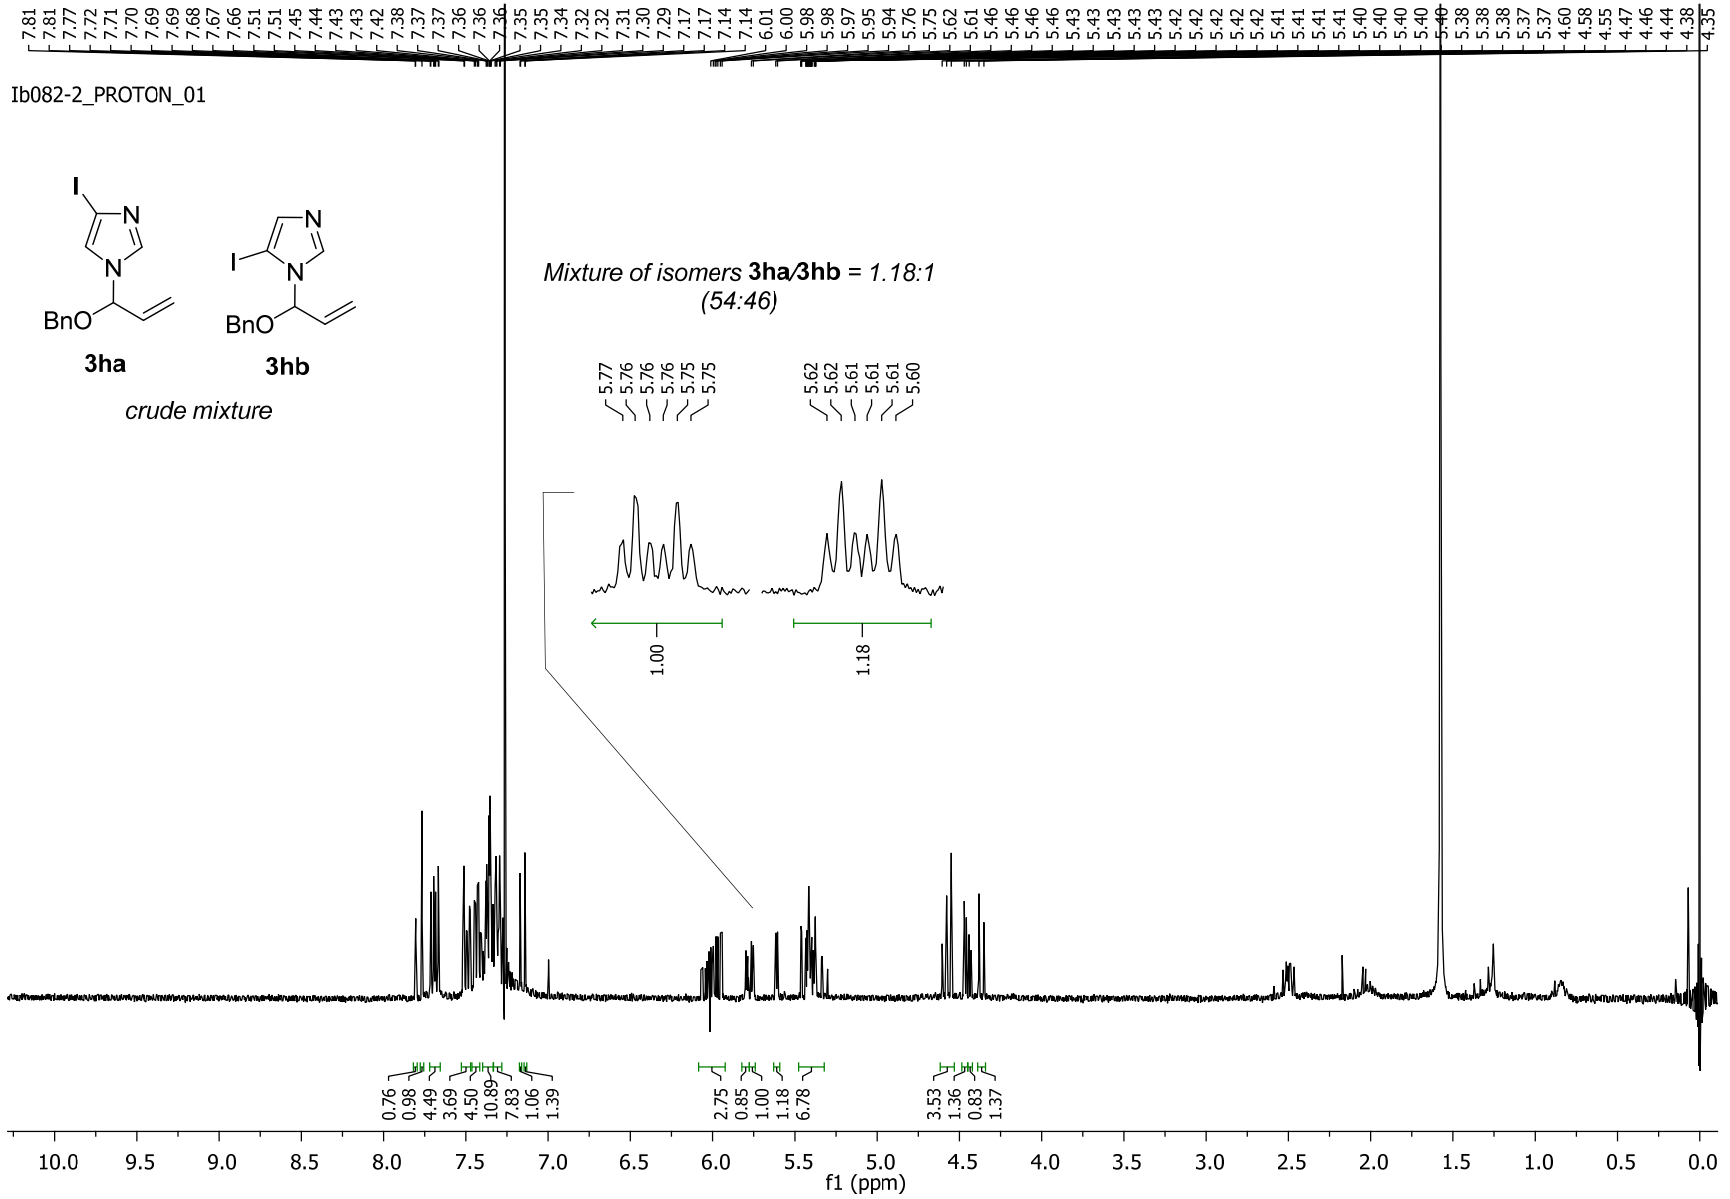

IB080-2-F3\_PROTON\_01

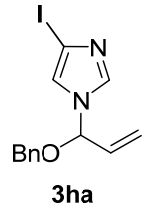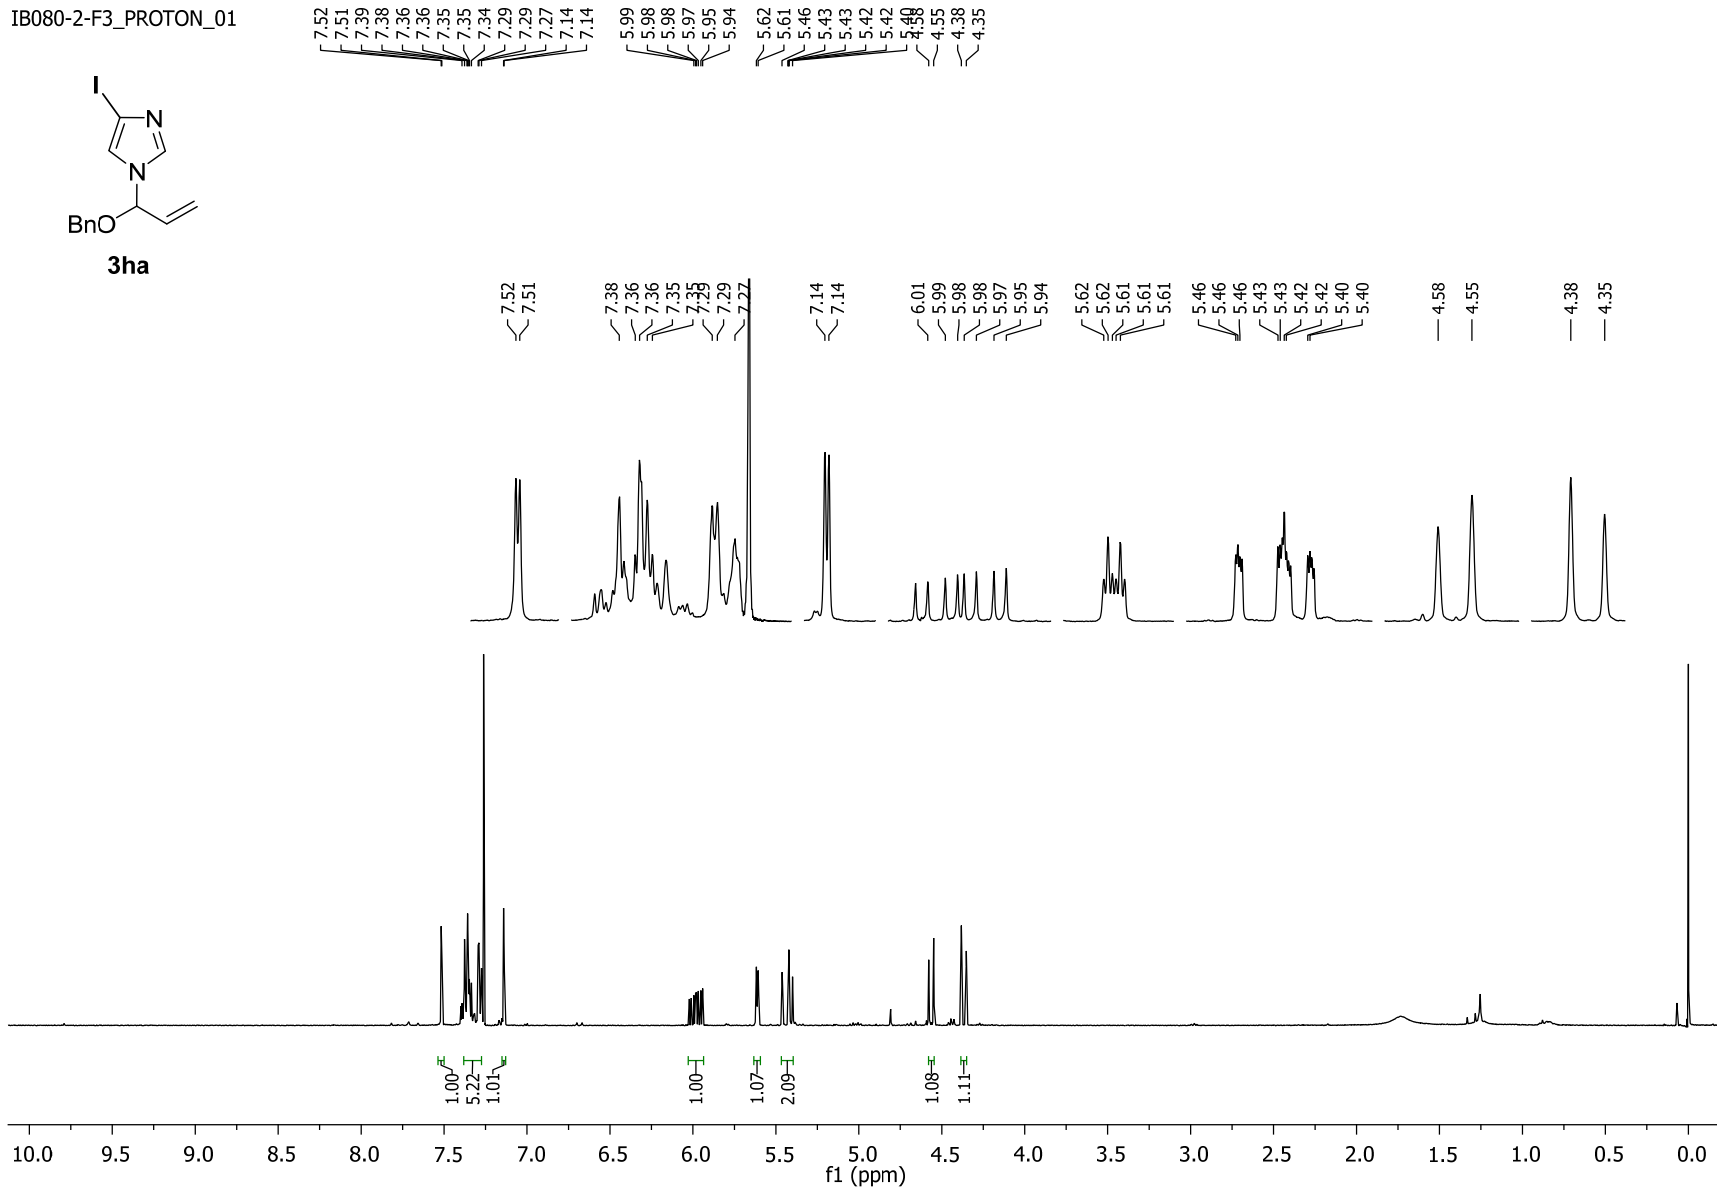

IB080-2-F3\_CARBON\_01

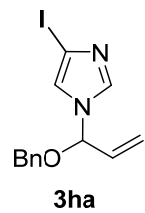

137.69  
135.83  
133.59  
128.70  
128.39  
127.90  
122.63  
119.55

84.56  
82.59

69.98

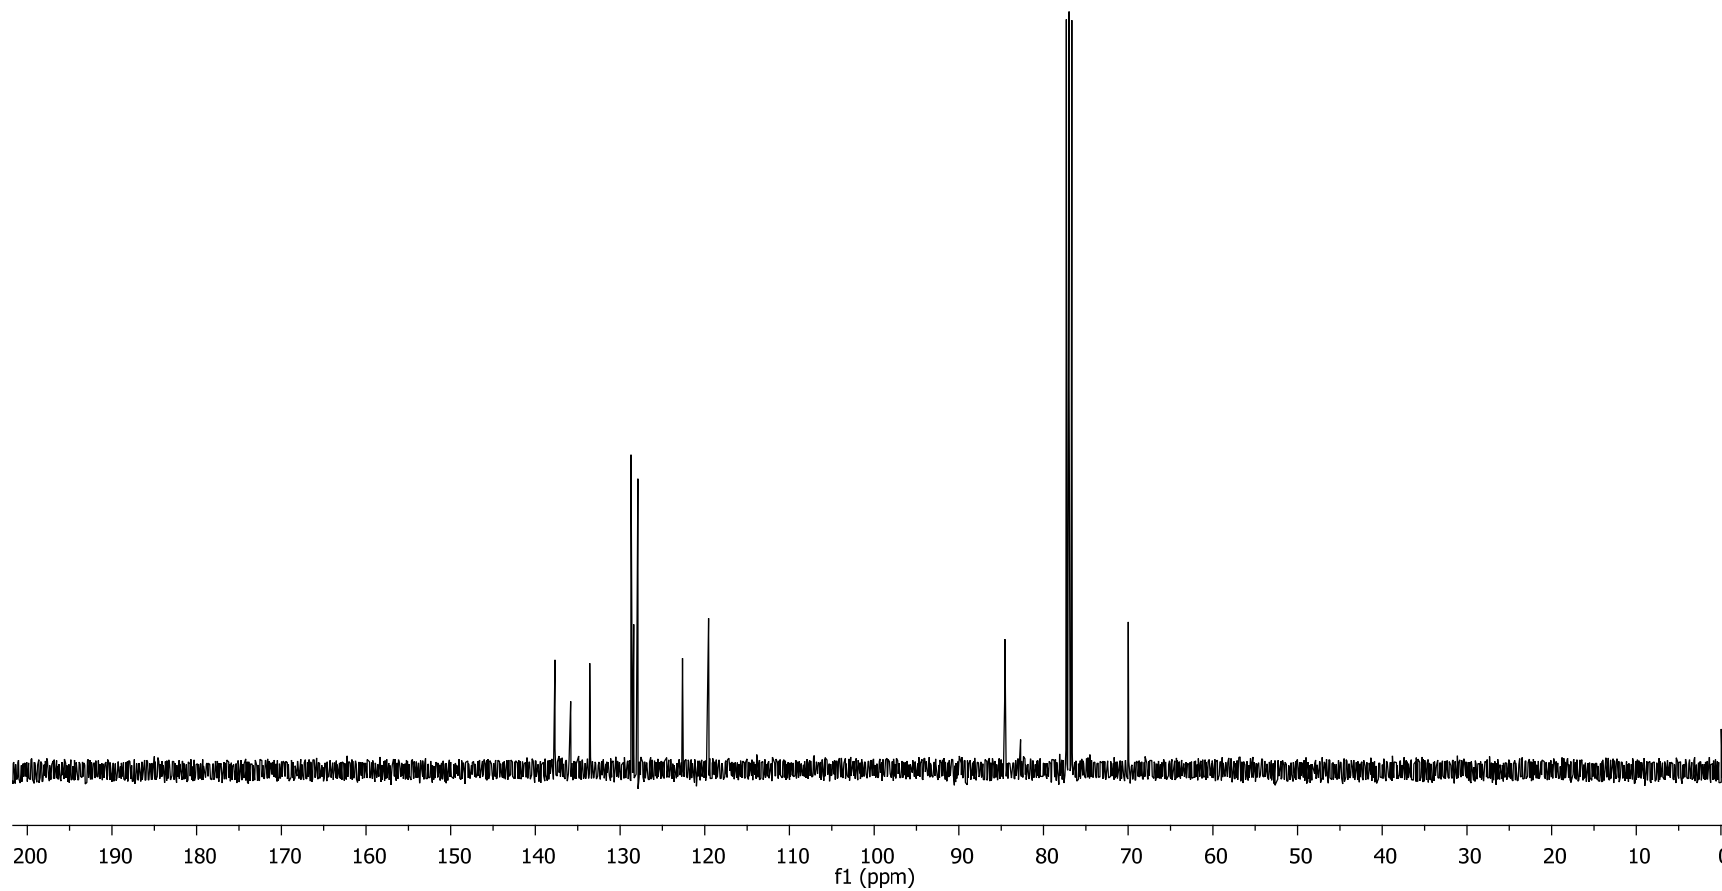

IB082-1F2  
1D Selective Gradient NOESY  
freq: 5.634ppm

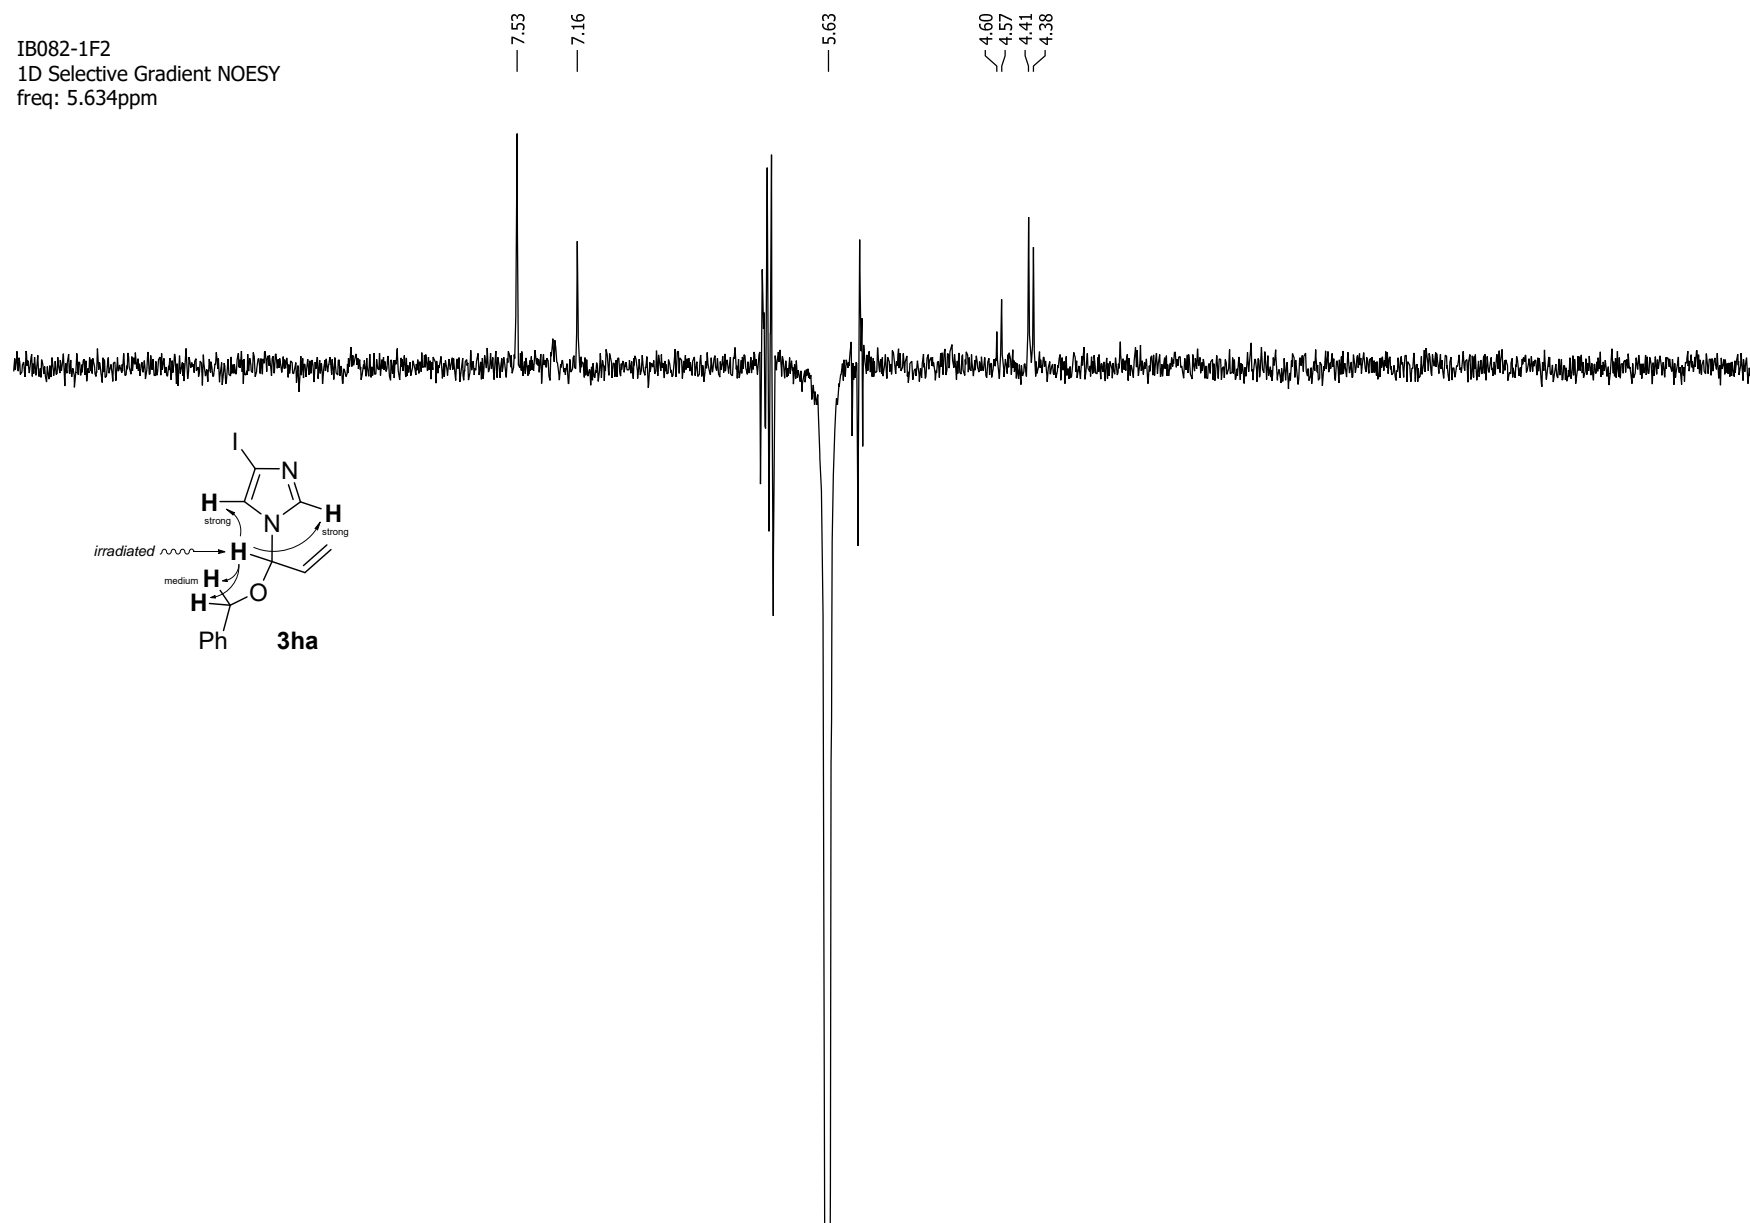

IB082-F1\_PROTON\_01

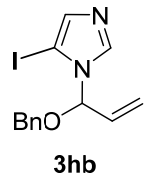

7.77  
7.39  
7.37  
7.35  
7.33  
7.32  
7.29  
6.02  
5.99  
5.98  
5.97  
5.95  
5.94  
5.76  
5.75  
5.43  
5.43  
5.42  
5.42  
5.41  
4.60  
4.57  
4.47  
4.44

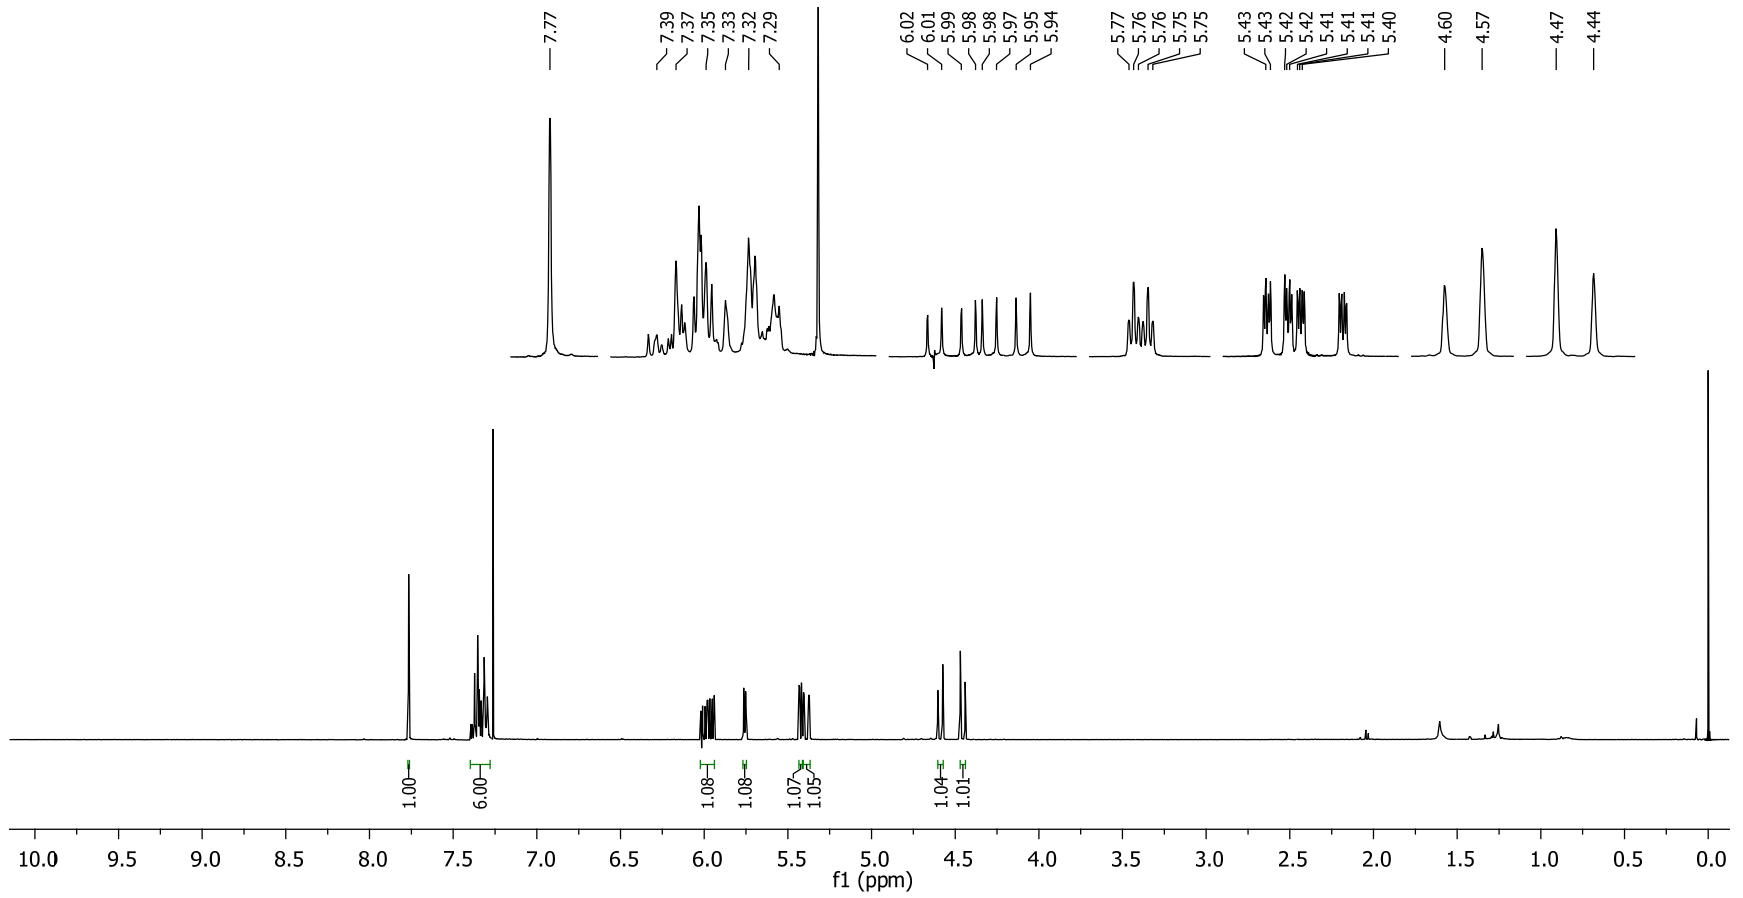



IB082-F1\_CARBON\_01

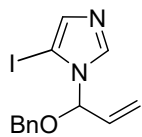

**3hb**

— 140.35  
— 135.73  
— 133.37  
— 128.65  
— 128.41  
— 128.08  
— 119.77  
— 87.78  
— 70.67

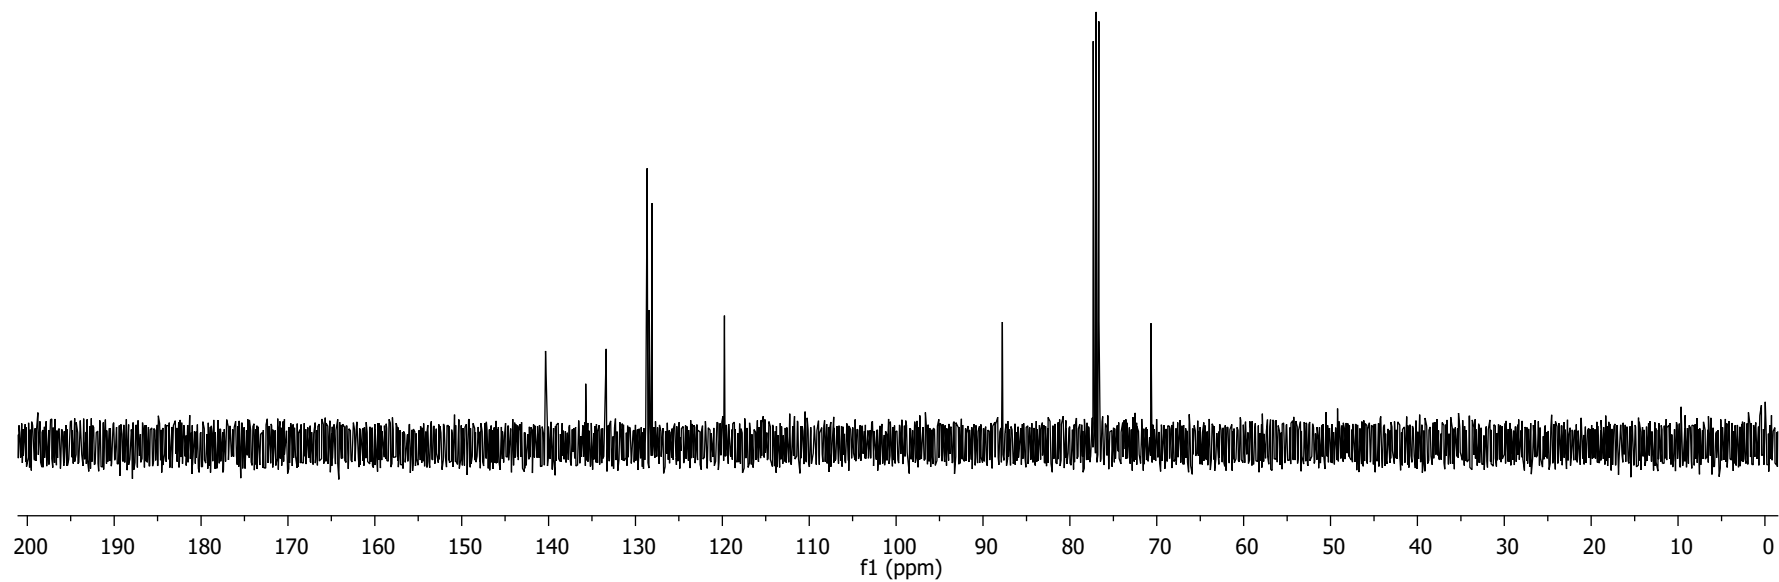

IB082-1F1  
1D Selective Gradient NOESY  
freq: 5.783ppm

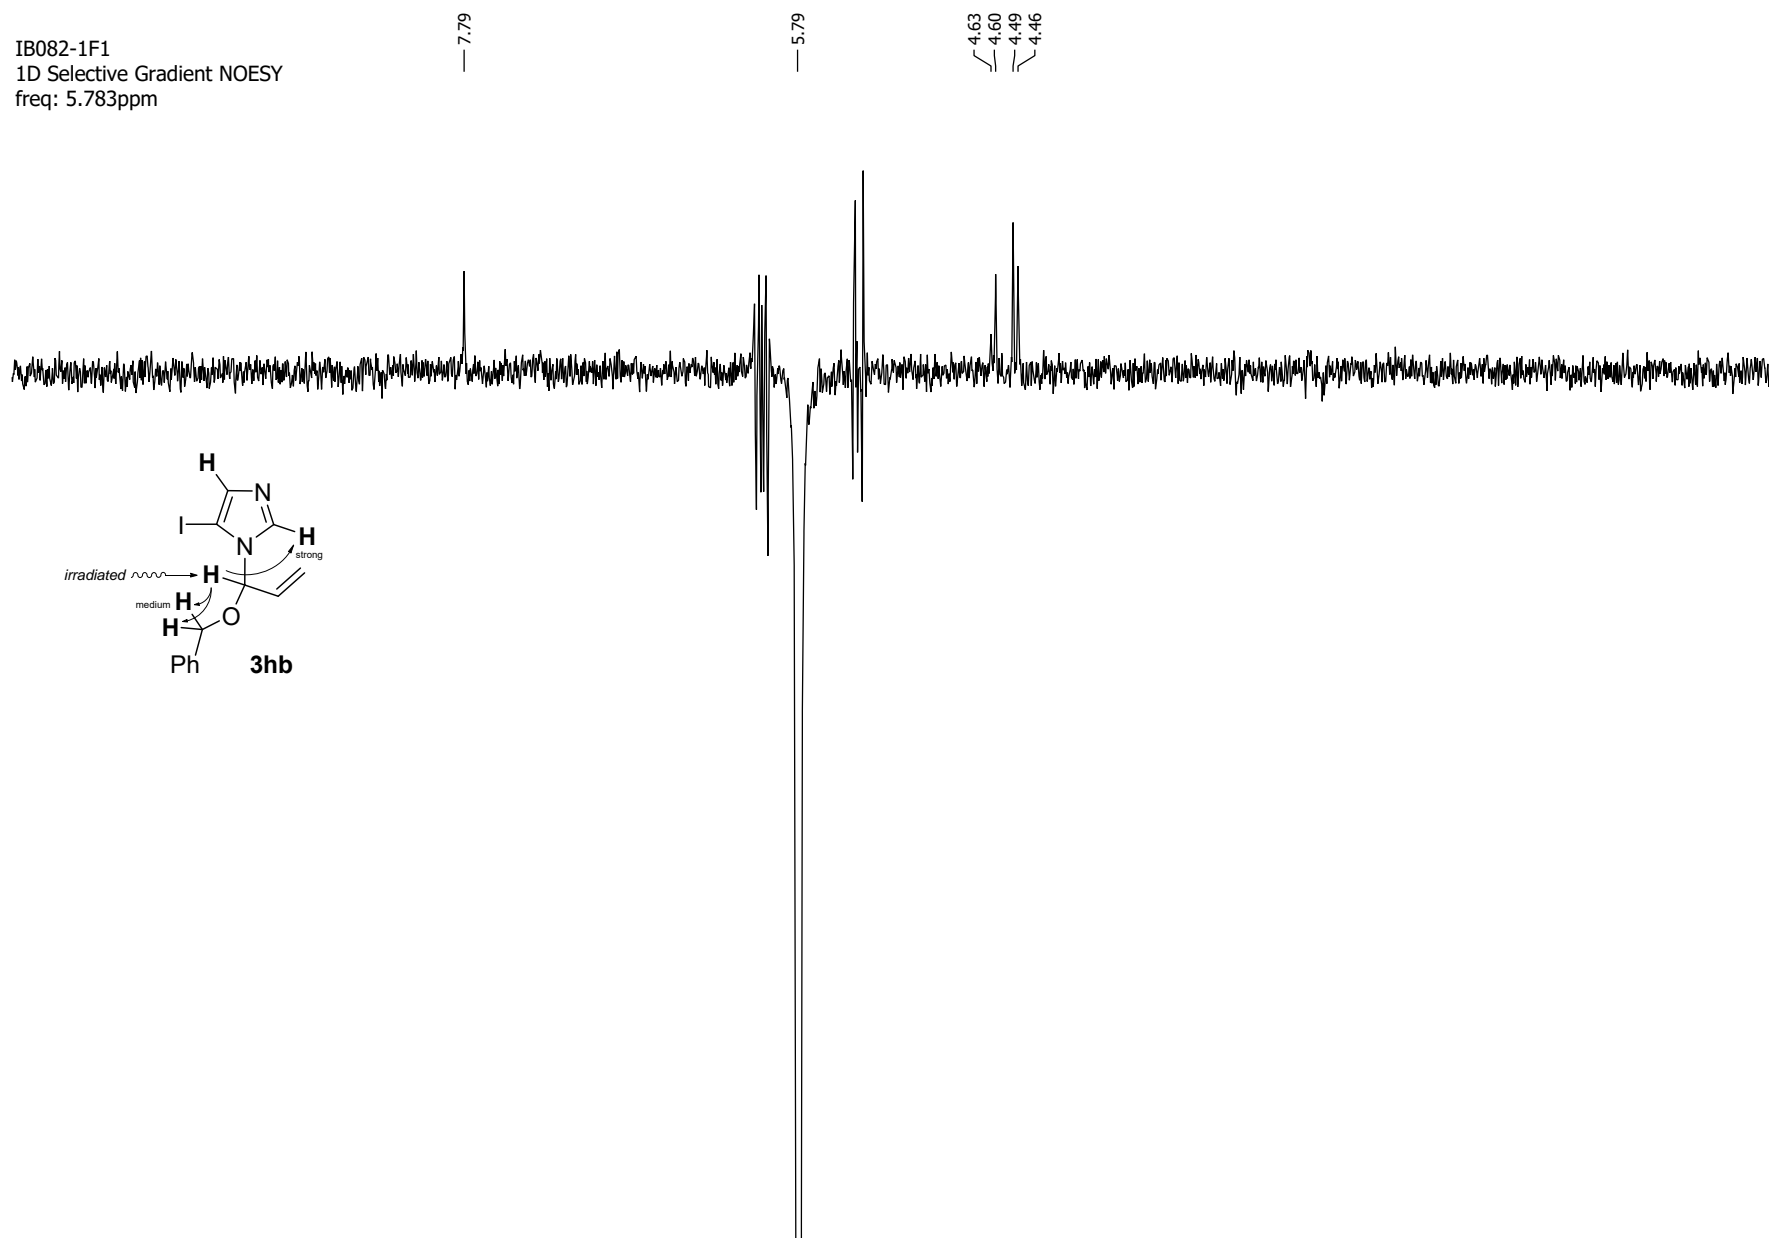

IB087-1F2Full\_PROTON\_01

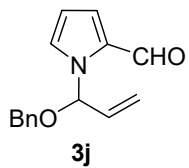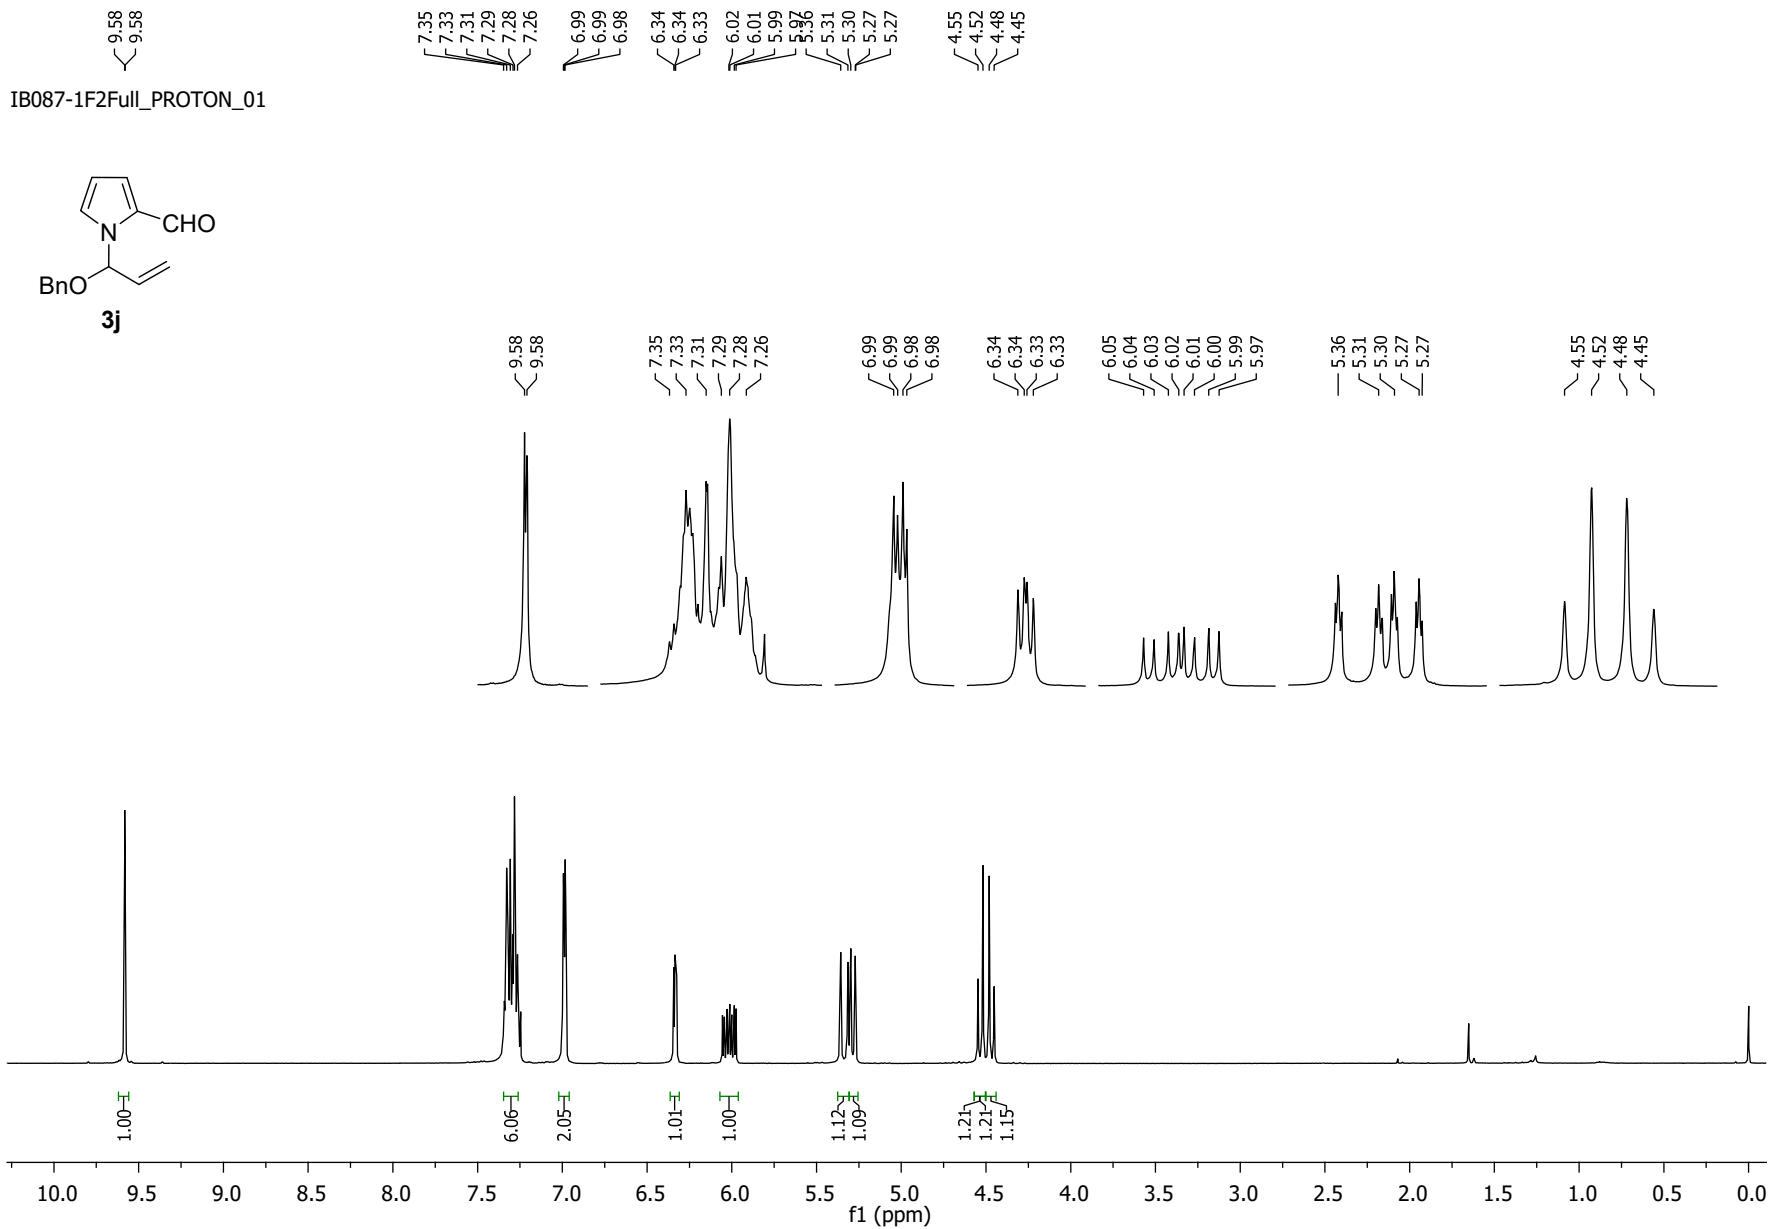

— 179.82

136.96  
135.19  
131.94  
128.41  
128.06  
127.92  
127.86  
125.41

— 118.07

— 111.02

— 85.05

— 70.59

IB087-1F2Full\_CARBON\_01

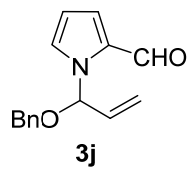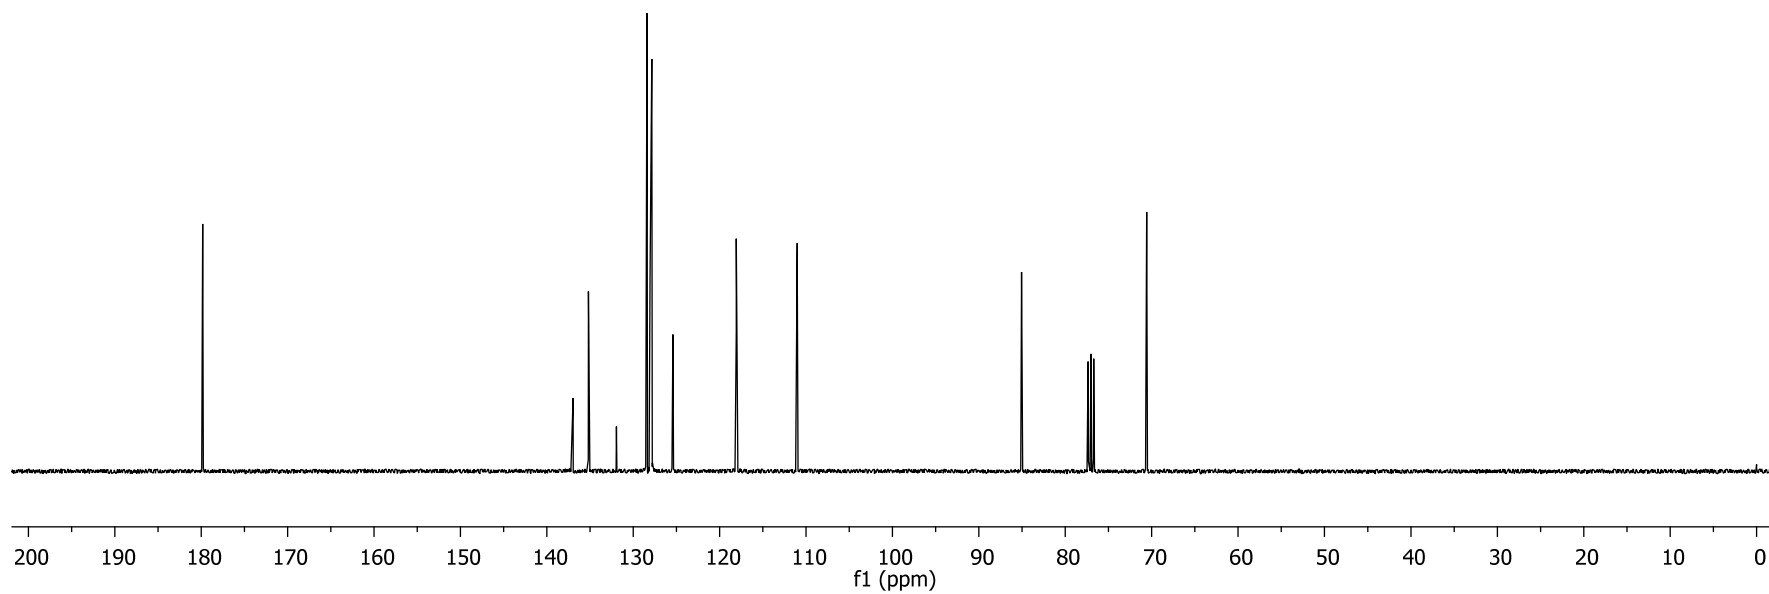

IB023\_PROTON\_01

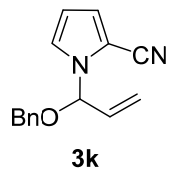

7.37  
7.35  
7.34  
7.32  
7.31  
7.31  
7.30  
7.05  
7.04  
7.04  
6.87  
6.86  
6.86  
6.28  
6.27  
6.27  
6.26  
6.00  
5.86  
5.85  
5.43  
5.42  
5.40  
5.40  
5.40  
5.39  
5.32  
4.49  
4.46  
4.43

7.37  
7.35  
7.34  
7.32  
7.31  
7.31  
7.30  
7.05  
7.05  
7.04  
7.04  
6.87  
6.86  
6.86  
6.28  
6.27  
6.26  
6.08  
6.07  
6.05  
6.04  
6.04  
6.02  
6.01  
6.00  
5.87  
5.86  
5.85  
5.43  
5.42  
5.40  
5.40  
5.40  
5.37  
4.52  
4.49  
4.46  
4.43

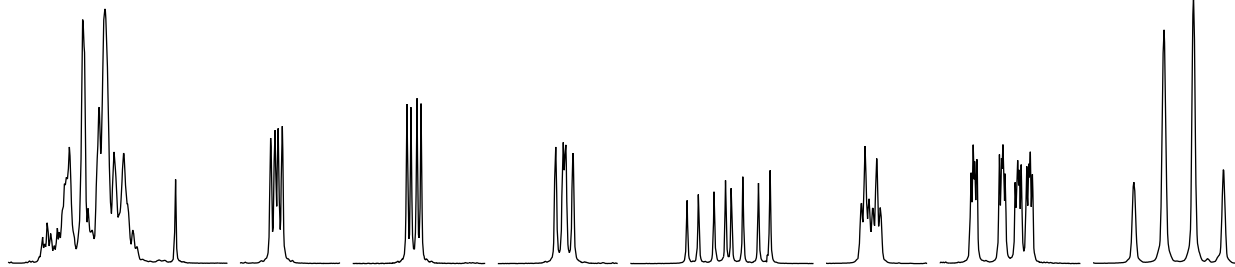

5.14

1.00

0.96

1.00

0.98

1.02

2.17

2.30

10.0 9.5 9.0 8.5 8.0 7.5 7.0 6.5 6.0 5.5 5.0 4.5 4.0 3.5 3.0 2.5 2.0 1.5 1.0 0.5 0.0

IB023\_CARBON\_01

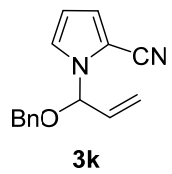

136.15  
133.92  
128.56  
128.21  
127.97  
124.23  
120.81  
119.27  
113.39  
110.55  
103.12  
86.15  
70.46

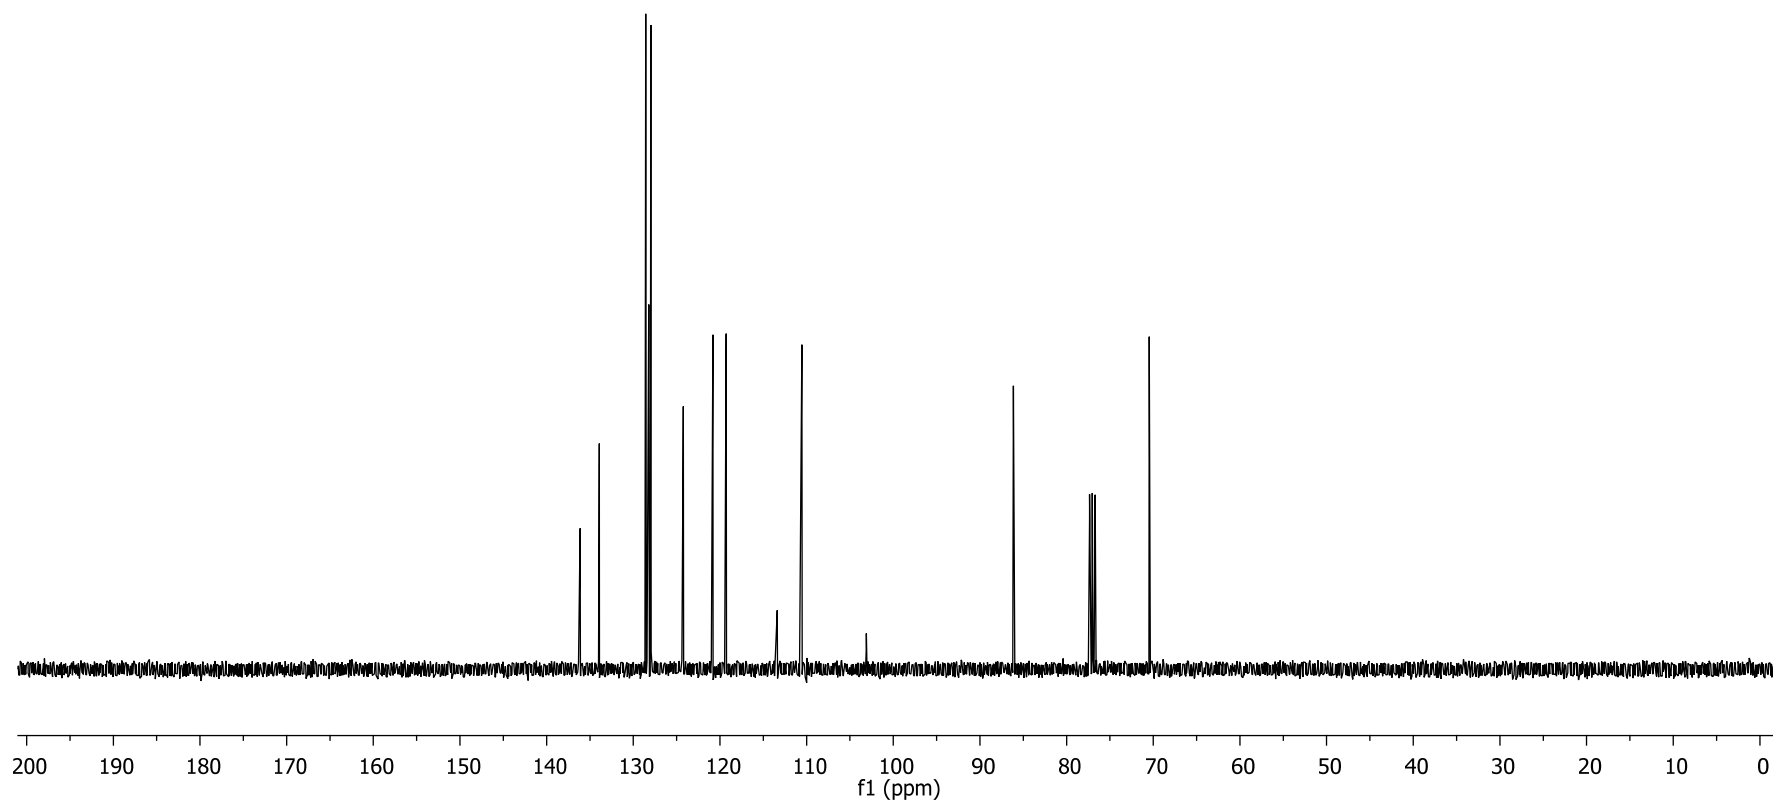

IB019-3\_PROTON\_01

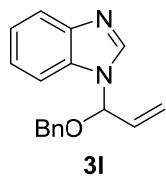

8.00  
7.85  
7.85  
7.83  
7.35  
7.34  
7.32  
7.30  
7.29  
7.27  
7.26  
6.15  
6.14  
6.13  
6.12  
6.11  
5.98  
5.97  
5.96  
5.44  
5.43  
5.41  
4.56  
4.53  
4.37  
4.34

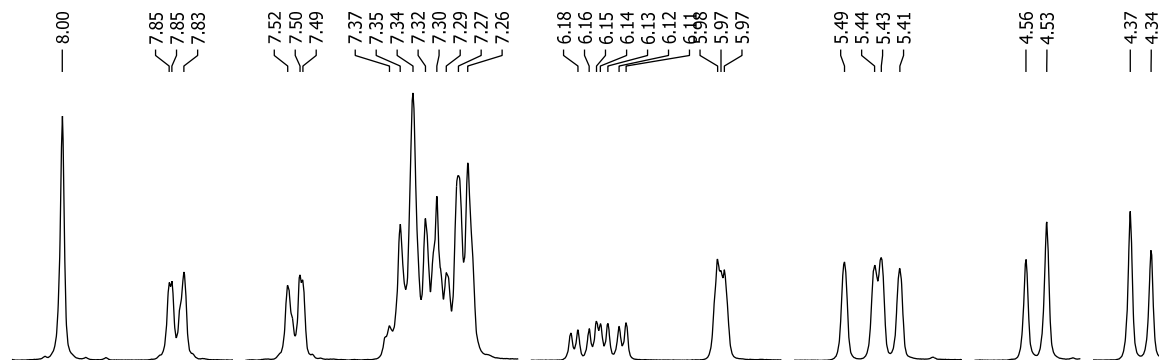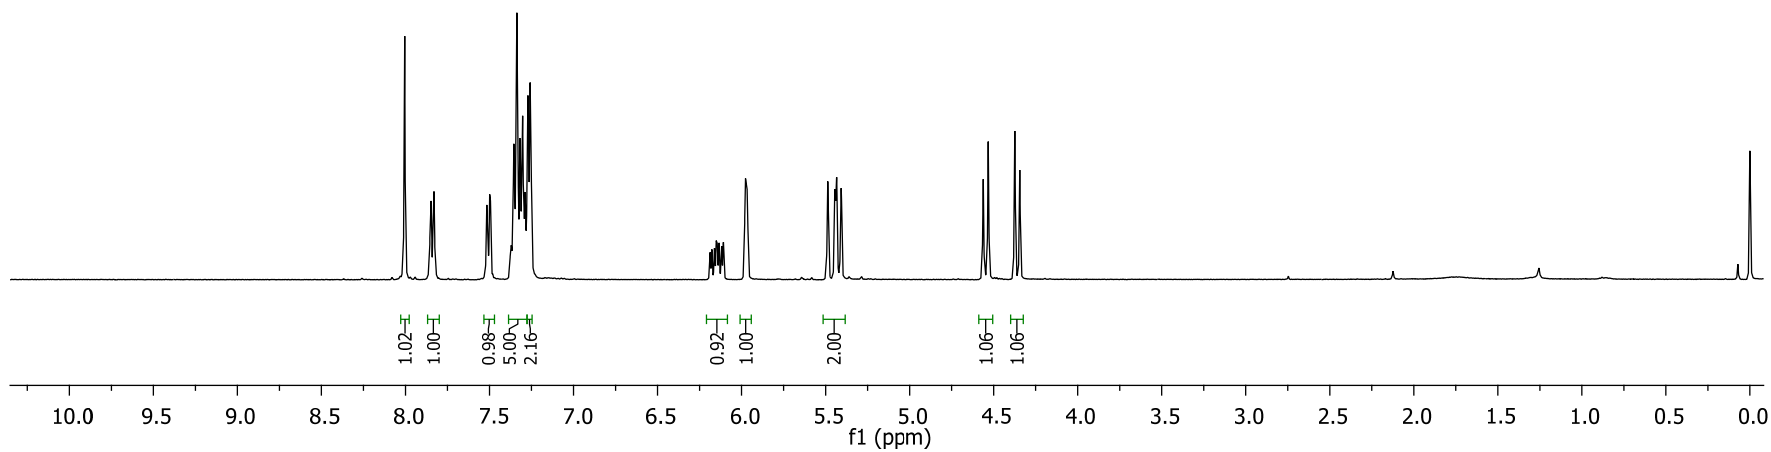

IB019-3\_CARBON\_01



— 144.28  
— 141.86  
— 136.13  
— 133.55  
— 128.62  
— 128.27  
— 127.99  
— 123.26  
— 122.69  
— 120.50  
— 119.31  
— 111.45

— 83.89

— 69.91

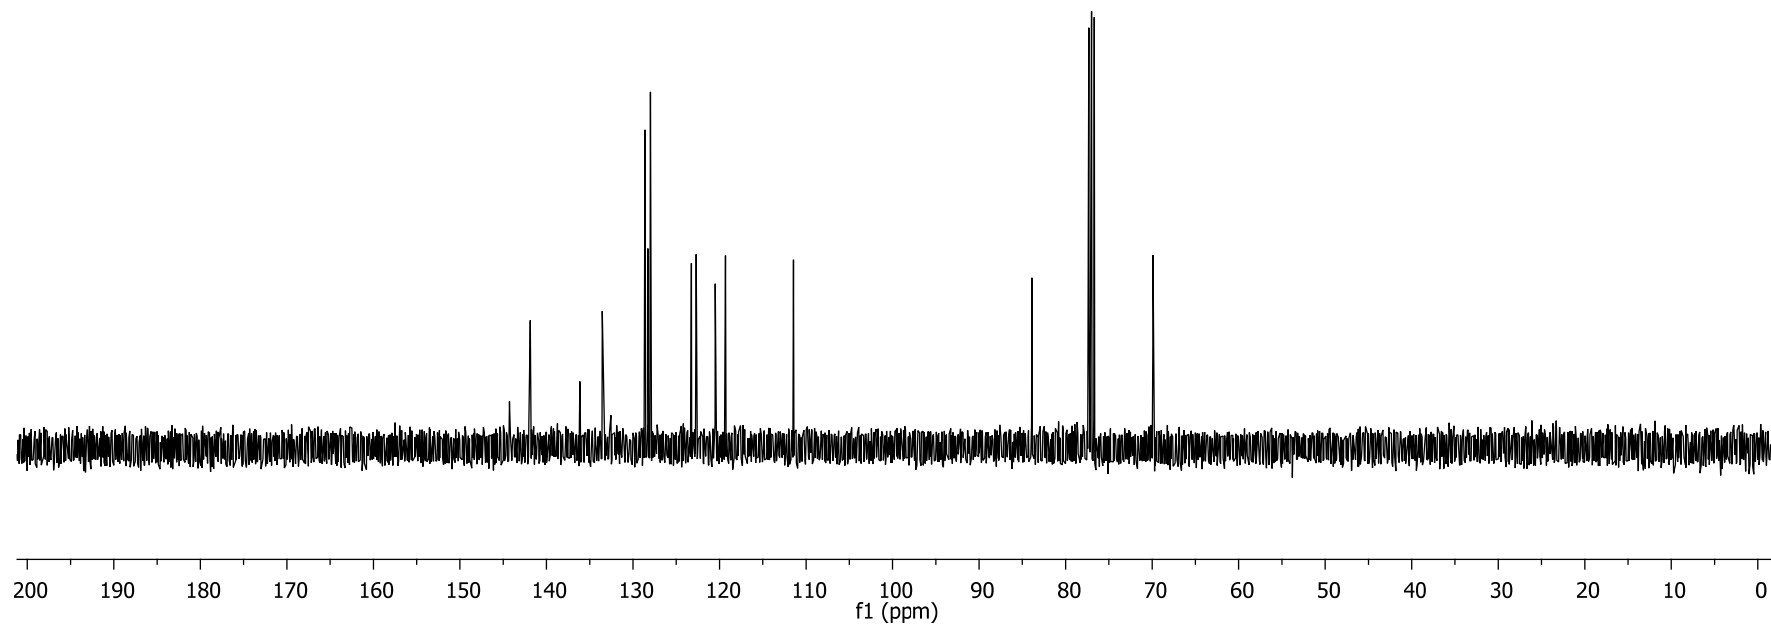



IB280-1F1Full\_PROTON\_01

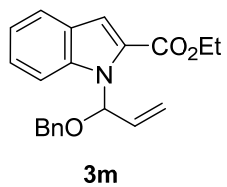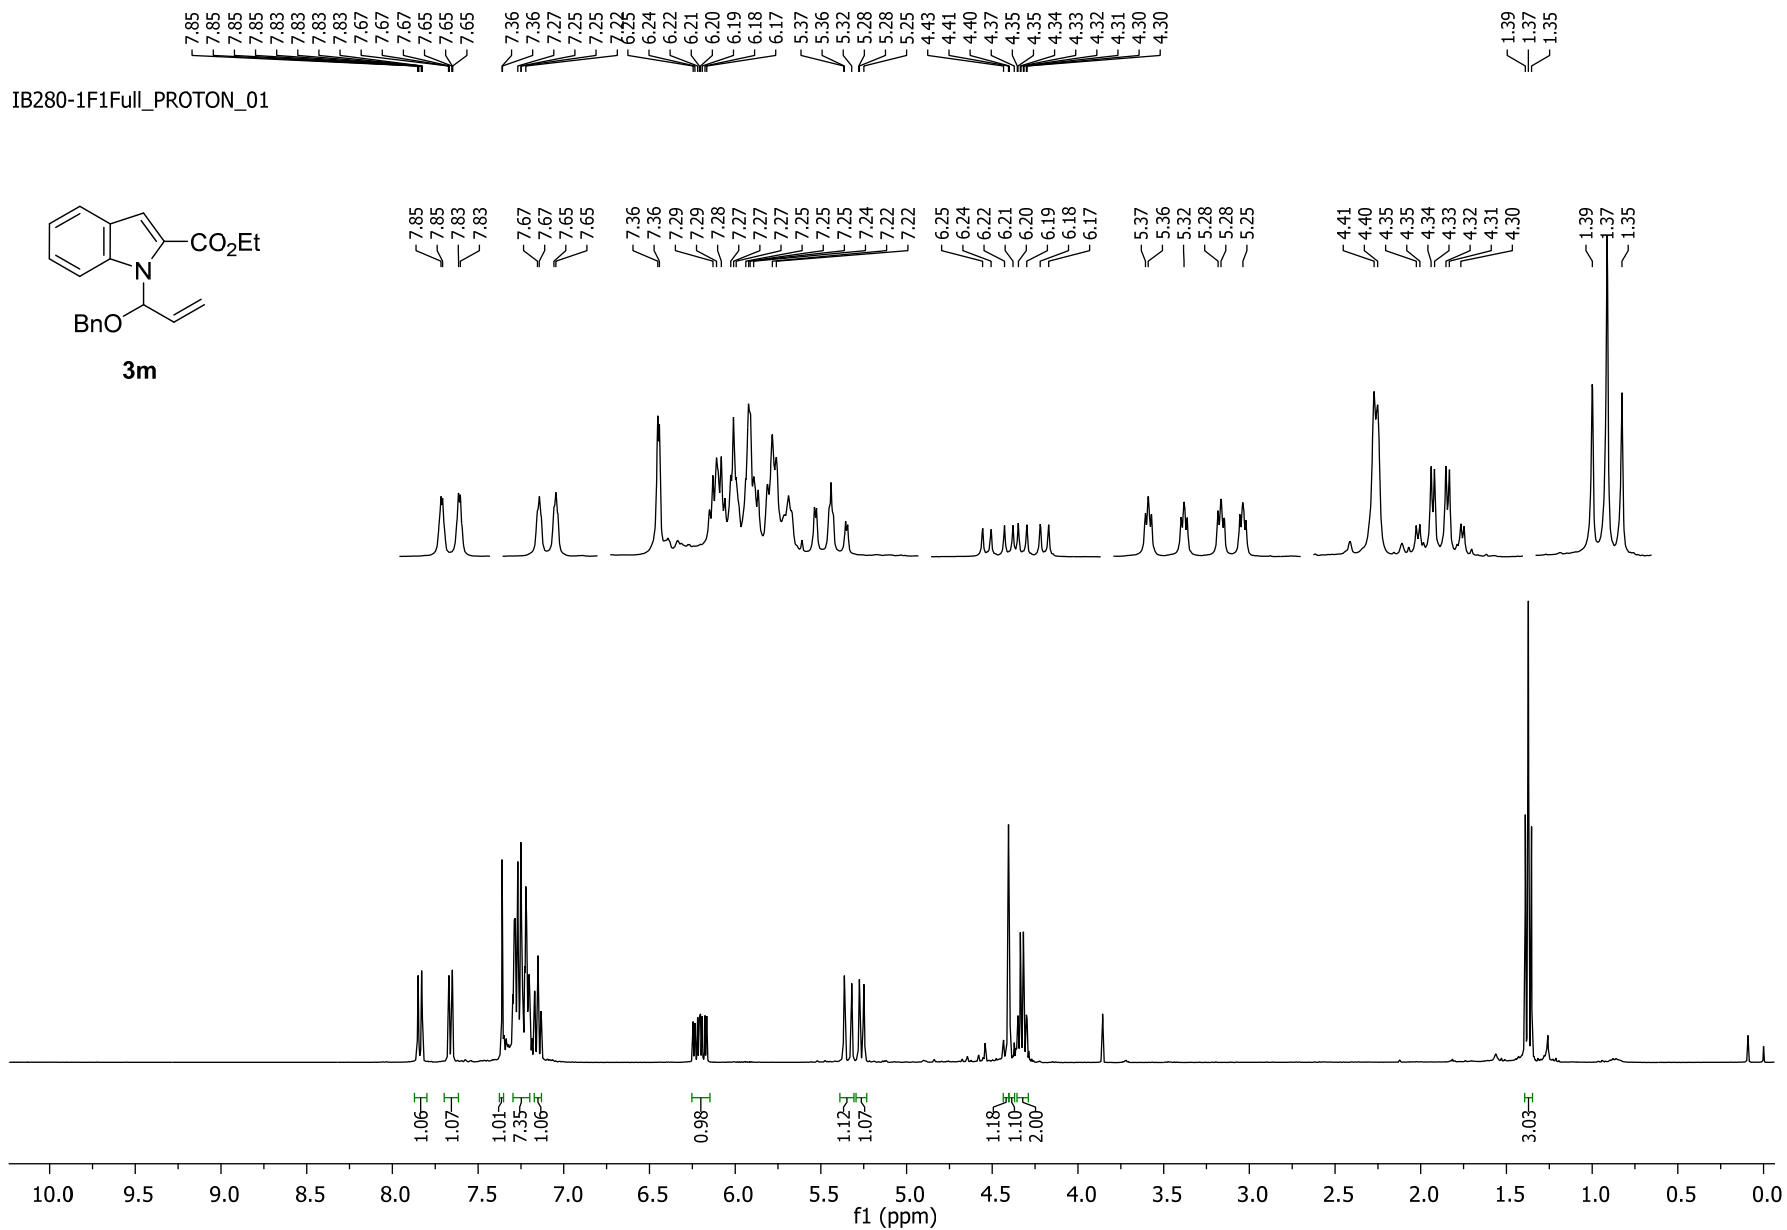

IB280-1F1Full\_CARBON\_01

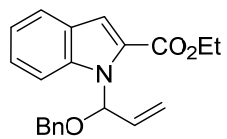

**3m**

— 162.16

137.96  
137.34  
134.91  
128.32  
128.09  
127.99  
127.76  
126.87  
125.02  
122.46  
121.22  
117.91  
115.10  
112.28

— 84.95

— 70.04

— 60.81

— 14.35

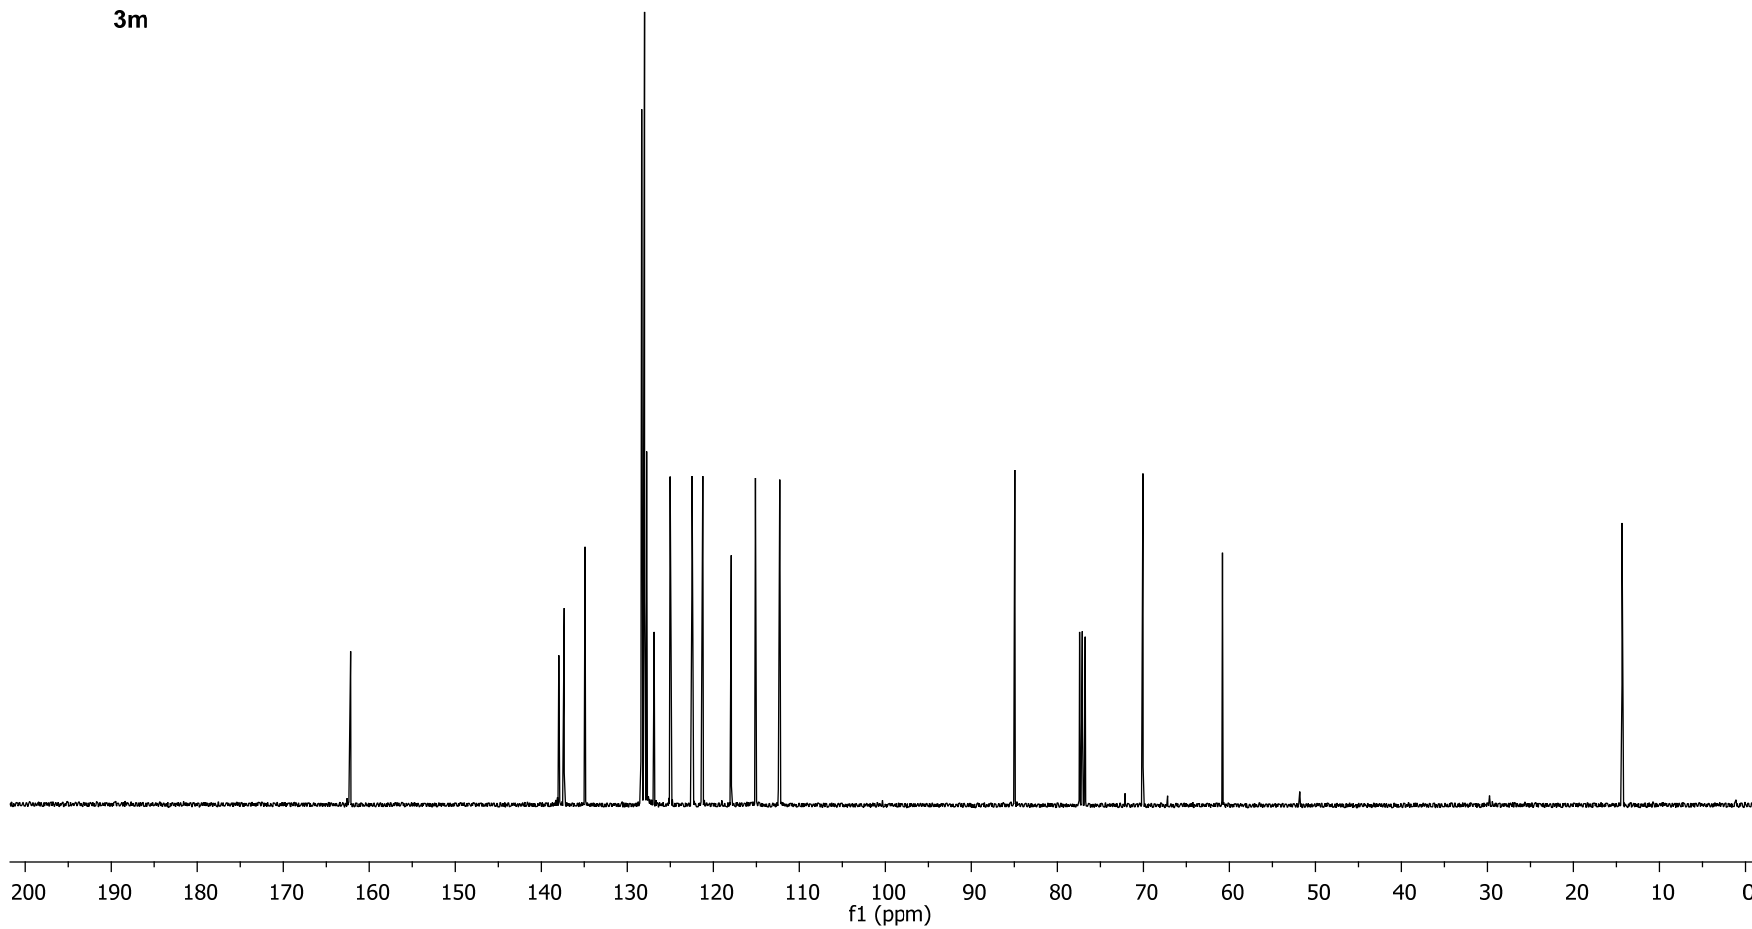

IB018-2\_PROTON\_01

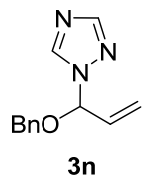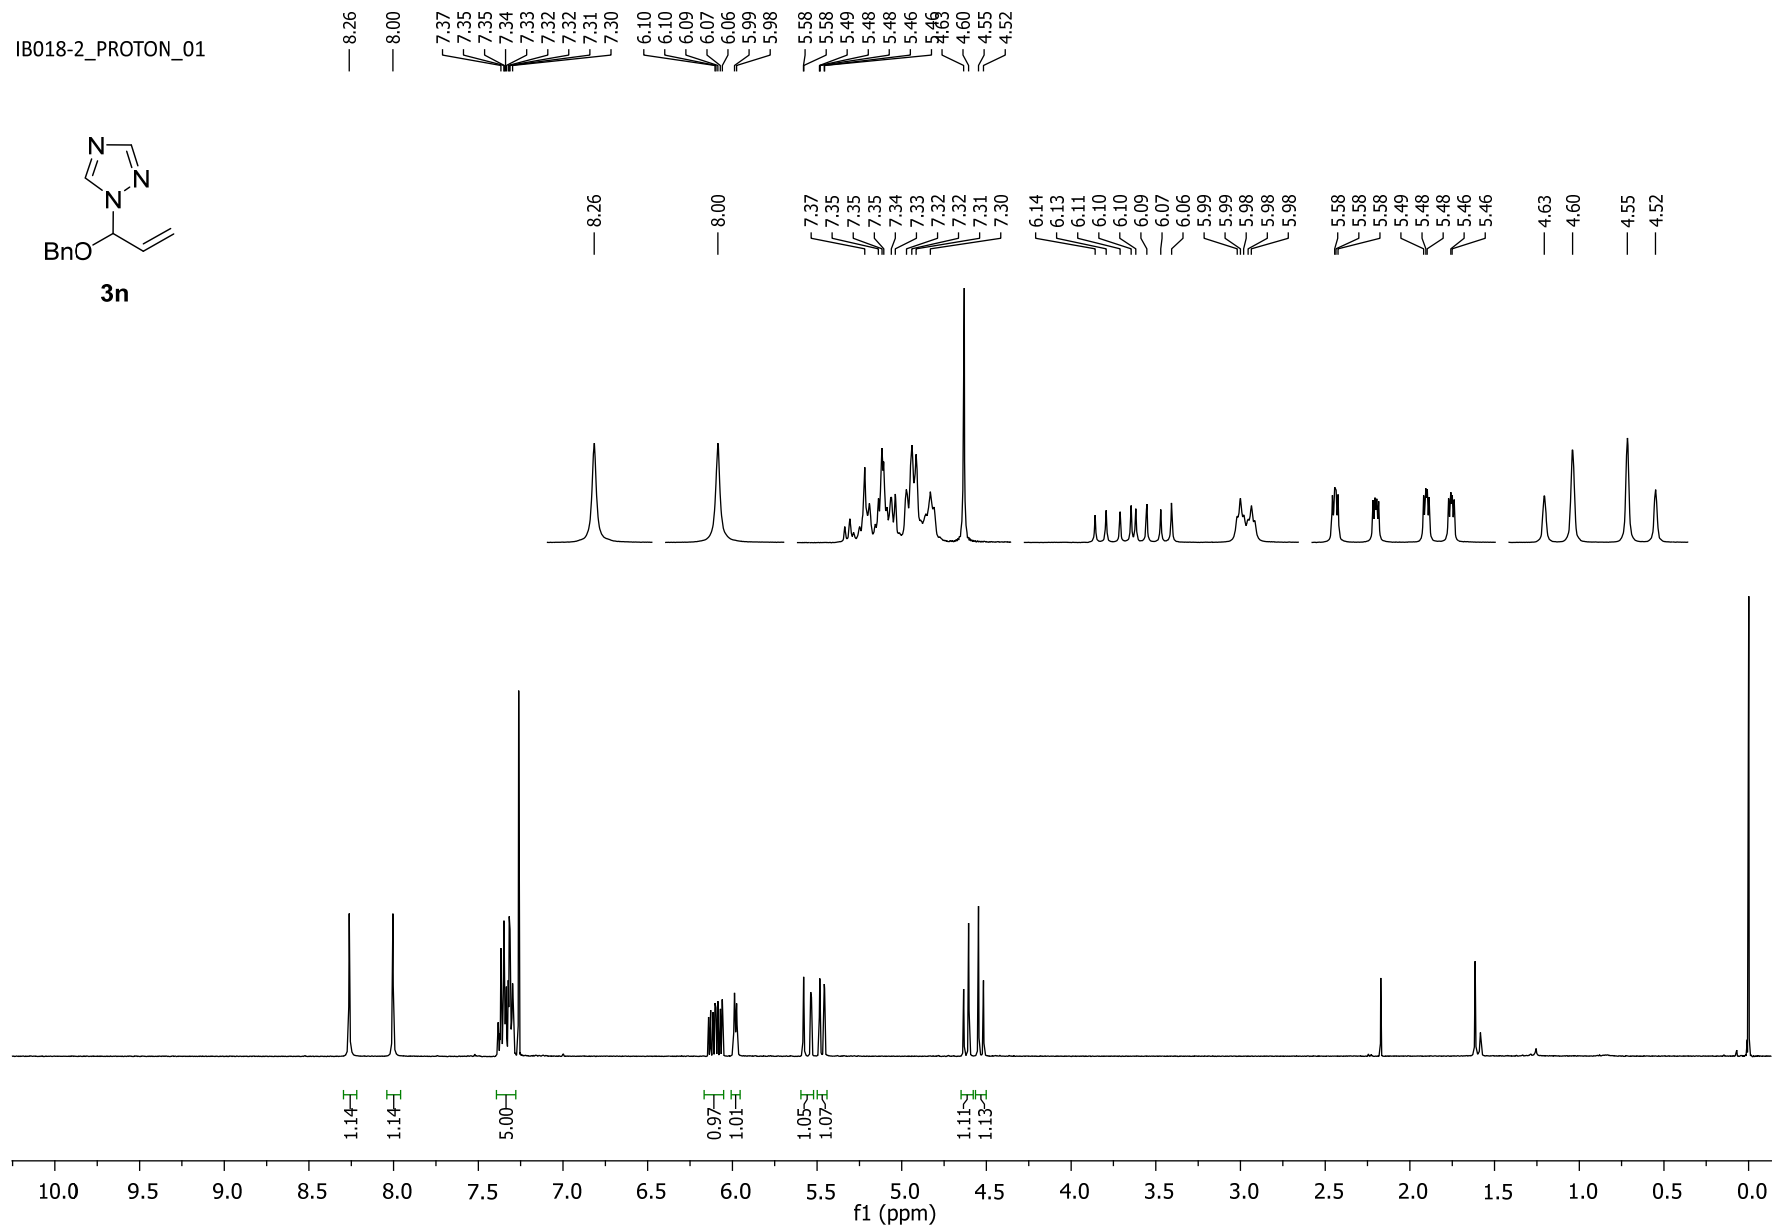

IB018-2\_CARBON\_01

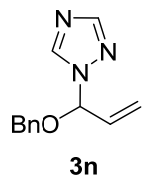

132.71  
128.60  
128.27  
127.94  
— 119.99  
— 109.96  
— 87.11  
— 70.74

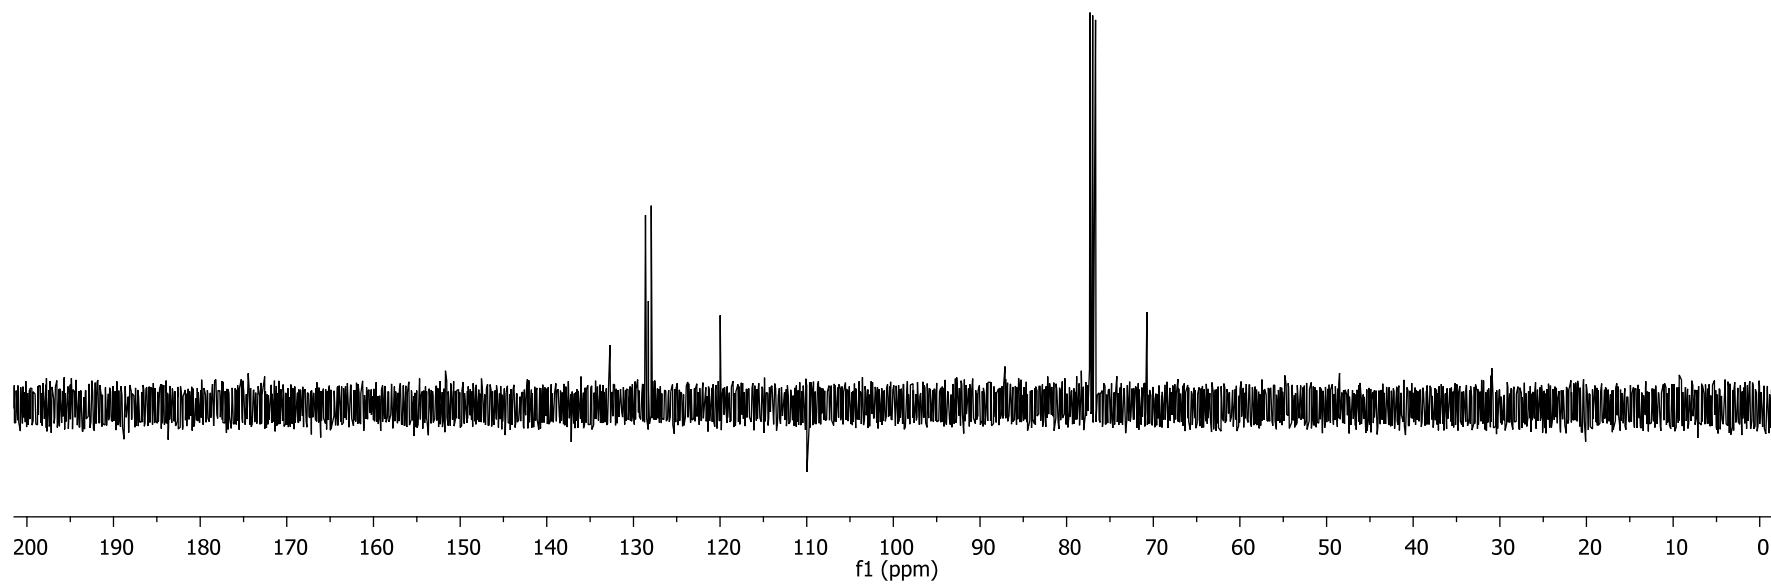

IB020-1\_PROTON\_01

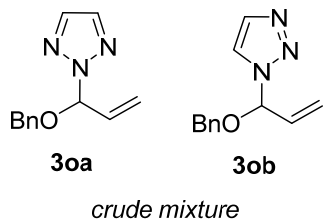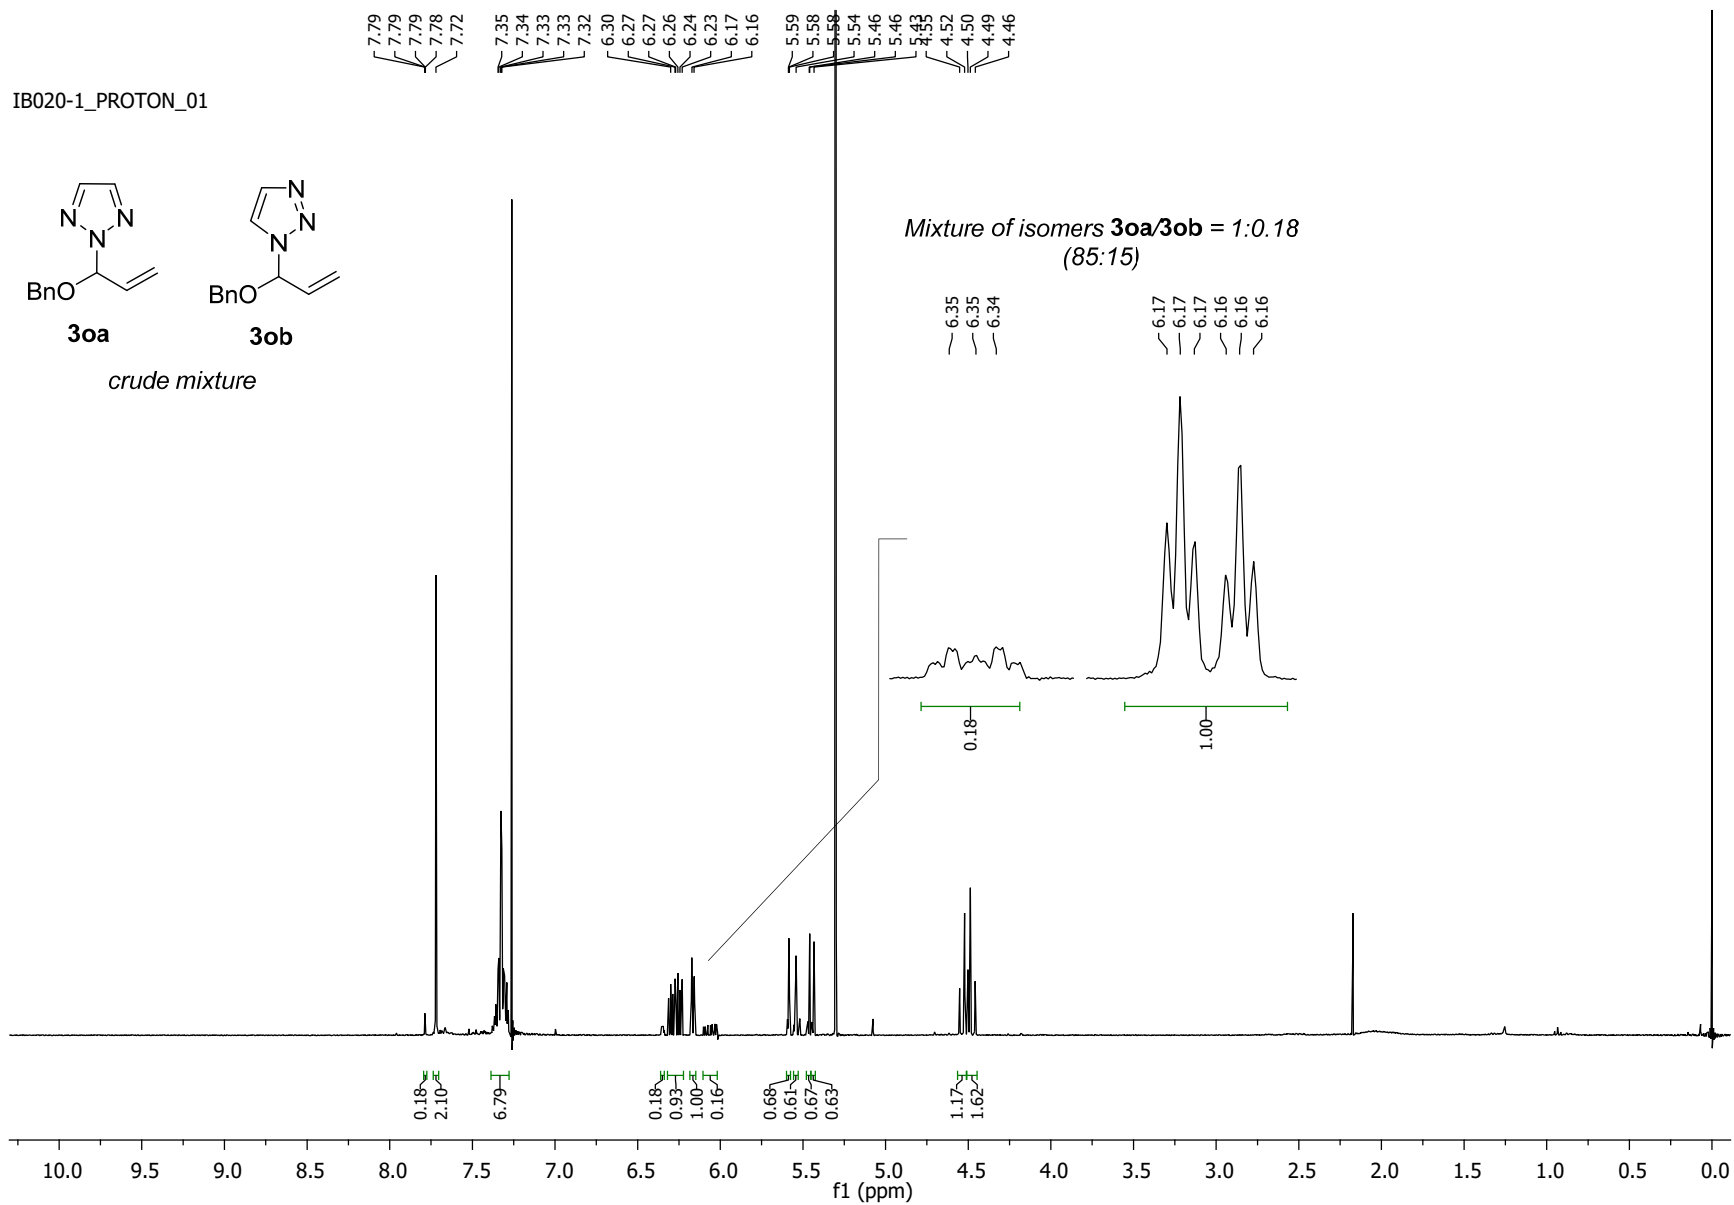

IB020a\_PROTON\_01

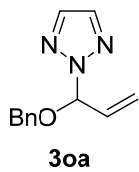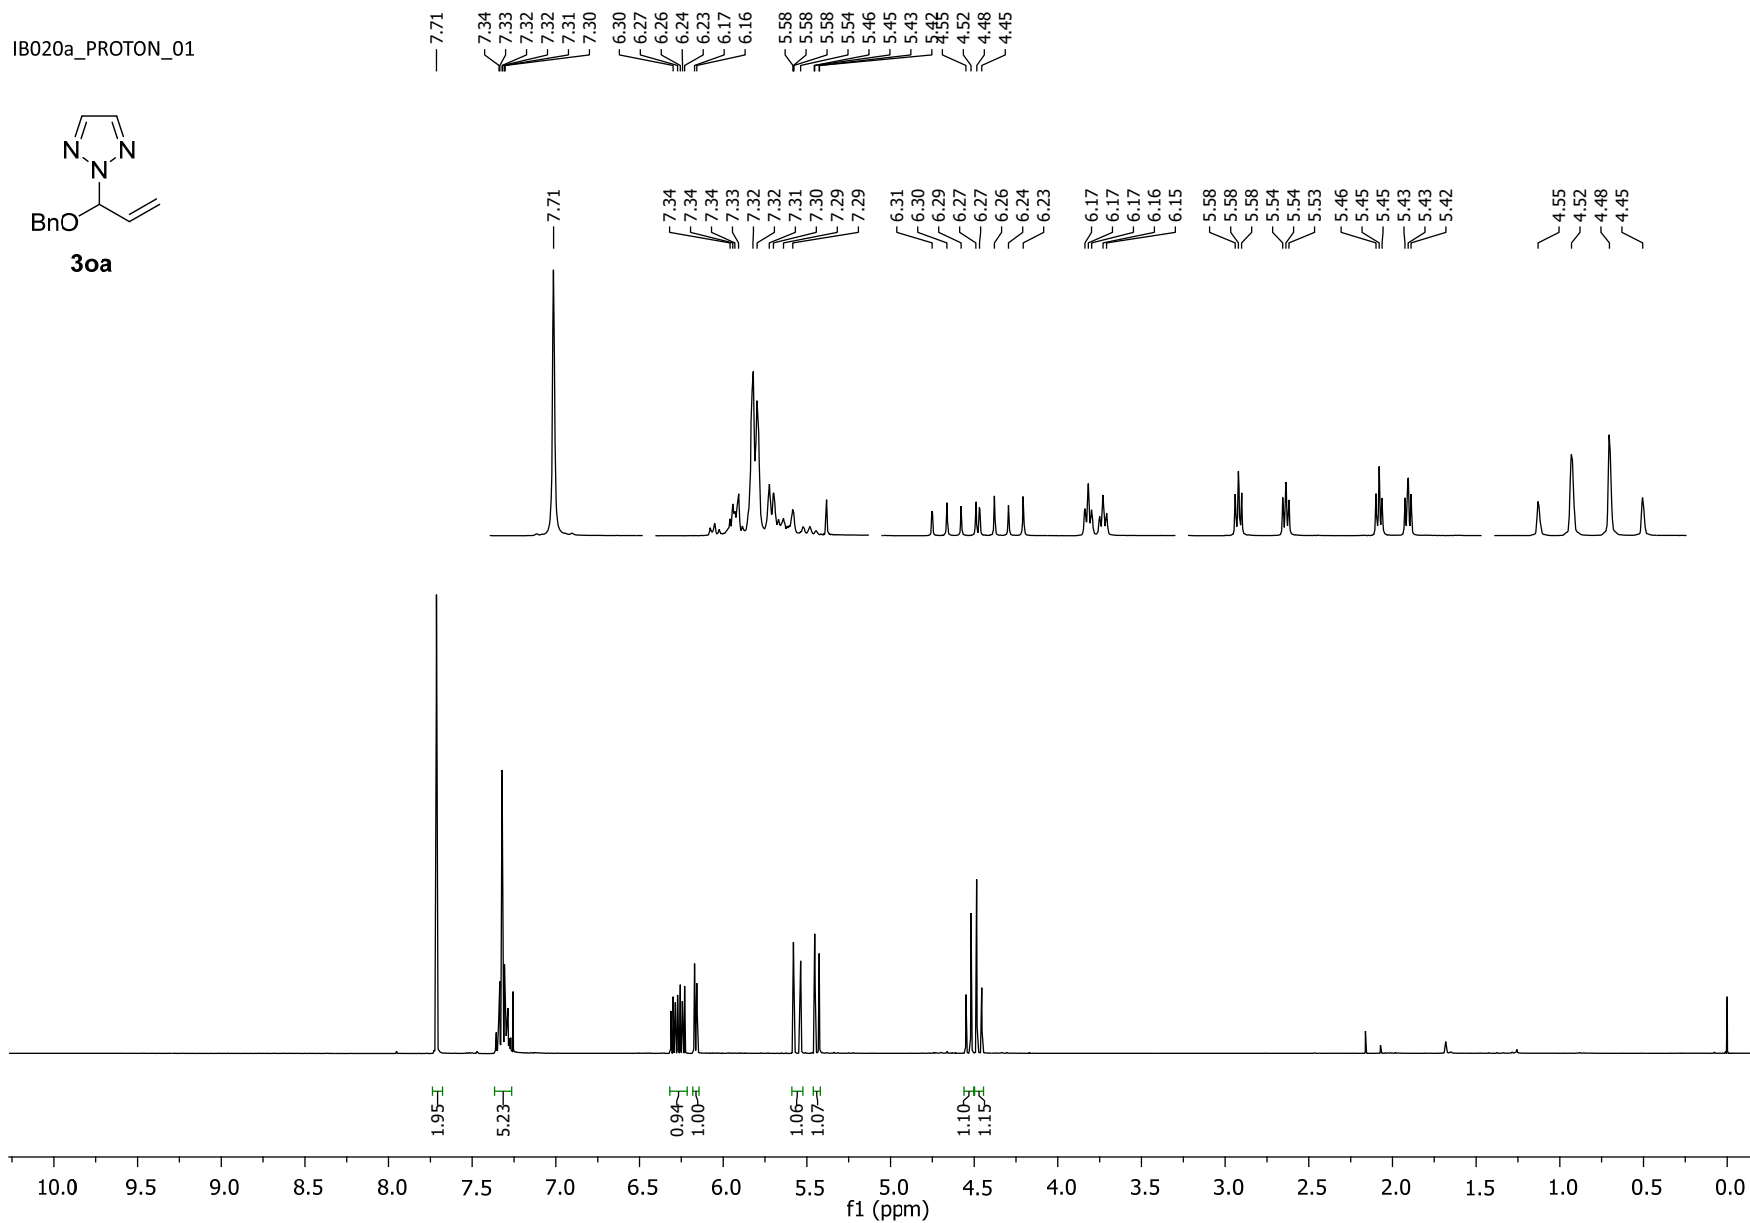

IB020a\_CARBON\_01

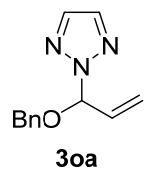

136.43  
134.95  
132.73  
128.43  
127.99  
119.63  
90.66  
70.41

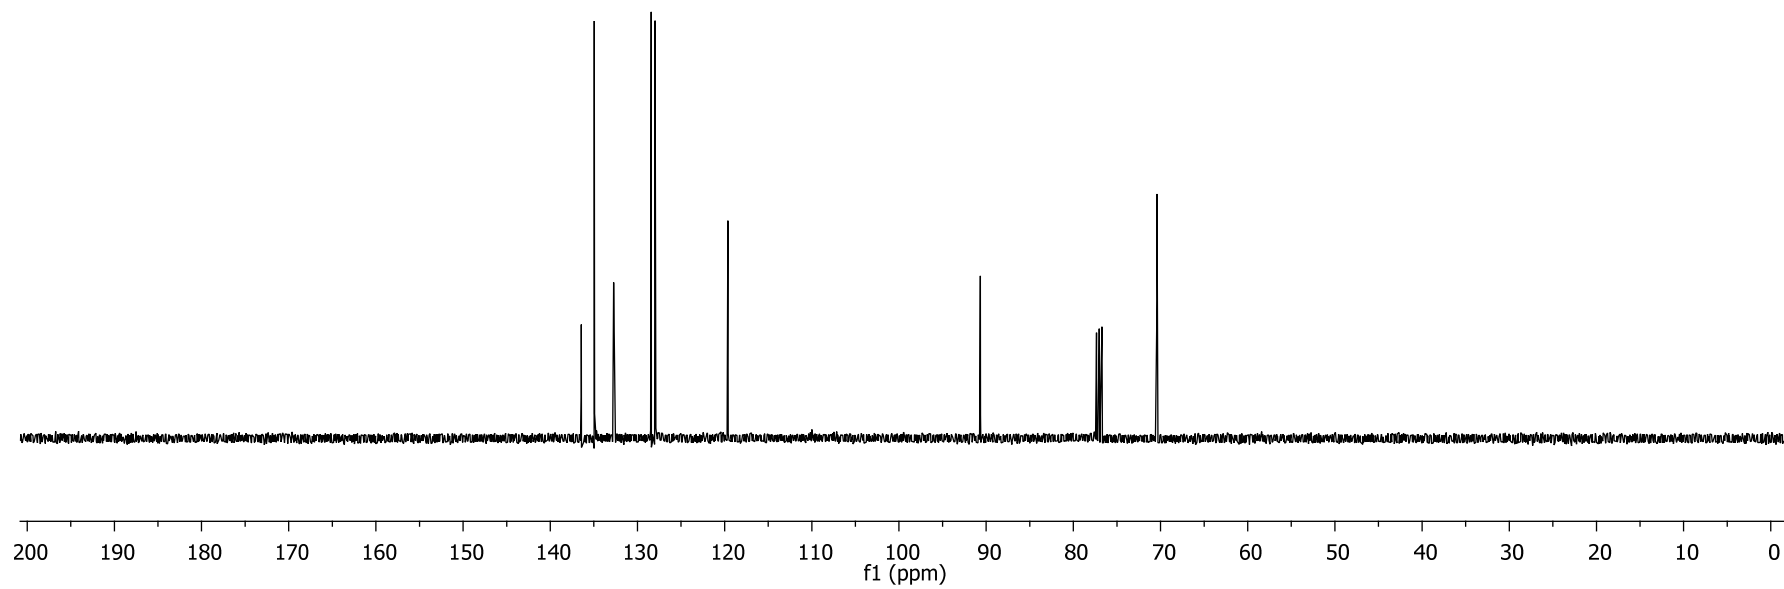

IB020-F1\_PROTON\_01

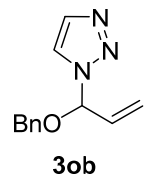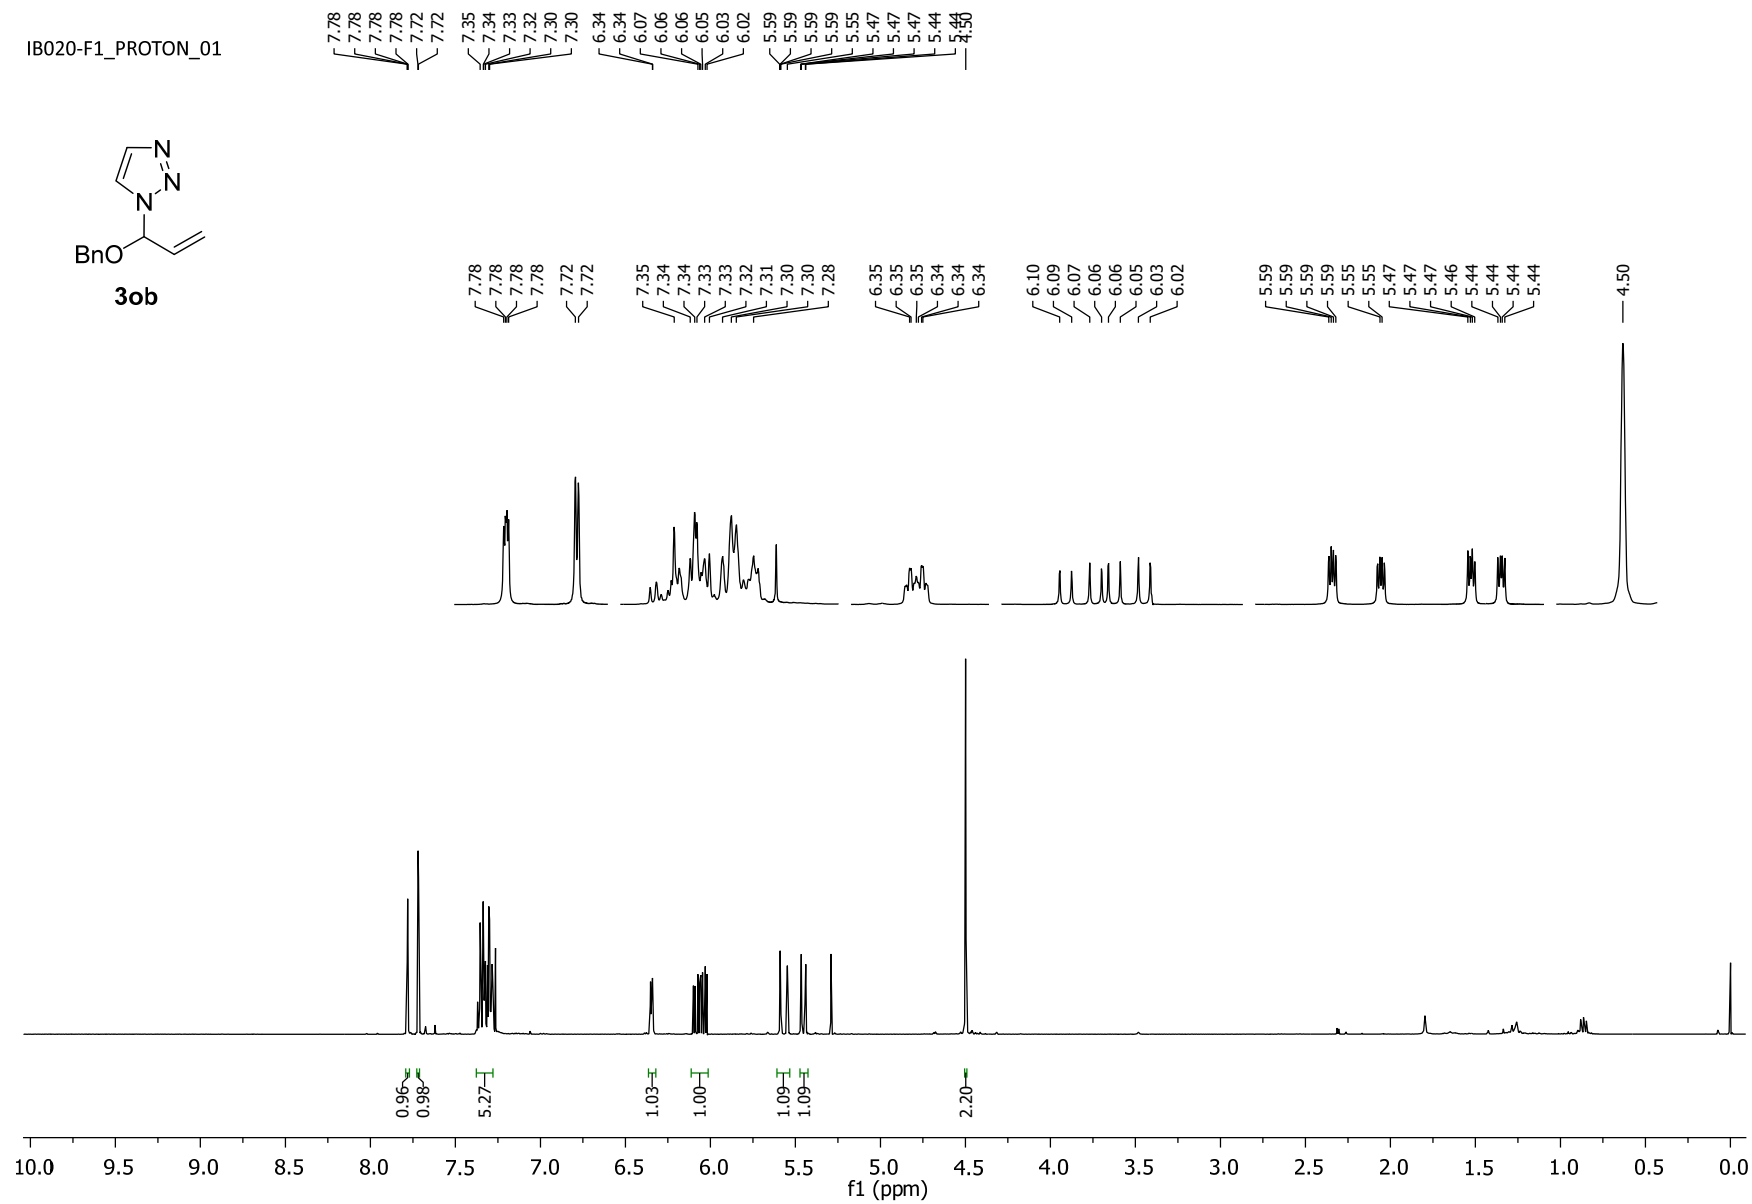



IB020b\_CARBO\_N\_01

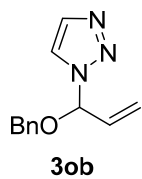

135.00  
133.57  
131.73  
127.55  
127.24  
127.04  
120.10  
118.86

86.09

69.62

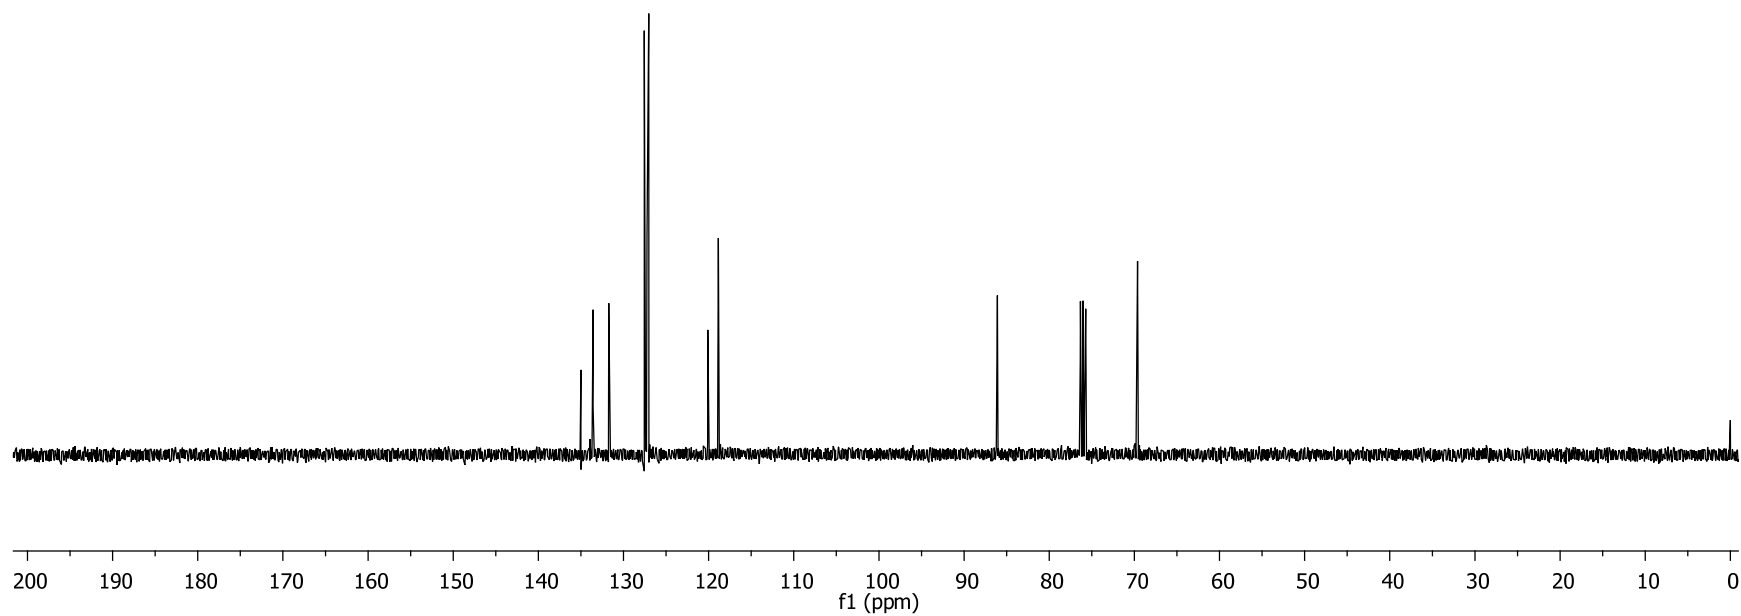

8.10  
8.10  
8.08  
8.08  
8.08  
7.94  
7.92  
7.91  
7.73  
7.73  
7.72  
7.71  
7.70  
7.70  
7.48  
7.48  
7.47  
7.46  
7.46  
7.45  
7.45  
7.44  
7.44  
7.41  
7.41  
7.40  
7.39  
7.39  
7.38  
7.37  
7.37  
7.34  
7.34  
7.33  
7.32  
7.32  
7.31  
7.31  
7.30  
7.30  
7.30  
7.29  
7.29  
7.28  
7.25  
7.25  
7.24  
6.68  
6.67  
6.67  
6.66  
6.66  
6.66  
6.42  
6.24  
6.24  
6.23  
6.22  
6.21  
6.21  
6.20  
6.19  
6.17  
6.16  
6.16  
5.62  
5.62  
5.62  
5.61  
5.58  
5.58  
5.57  
5.57  
5.49  
5.49  
5.49  
5.49  
5.47  
5.47  
5.46  
5.46  
4.58  
4.58  
4.54  
4.54  
4.46  
4.46  
4.45  
4.45

IB022-1\_PROTON\_01

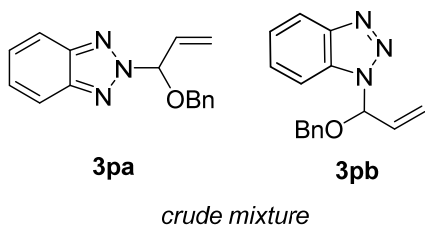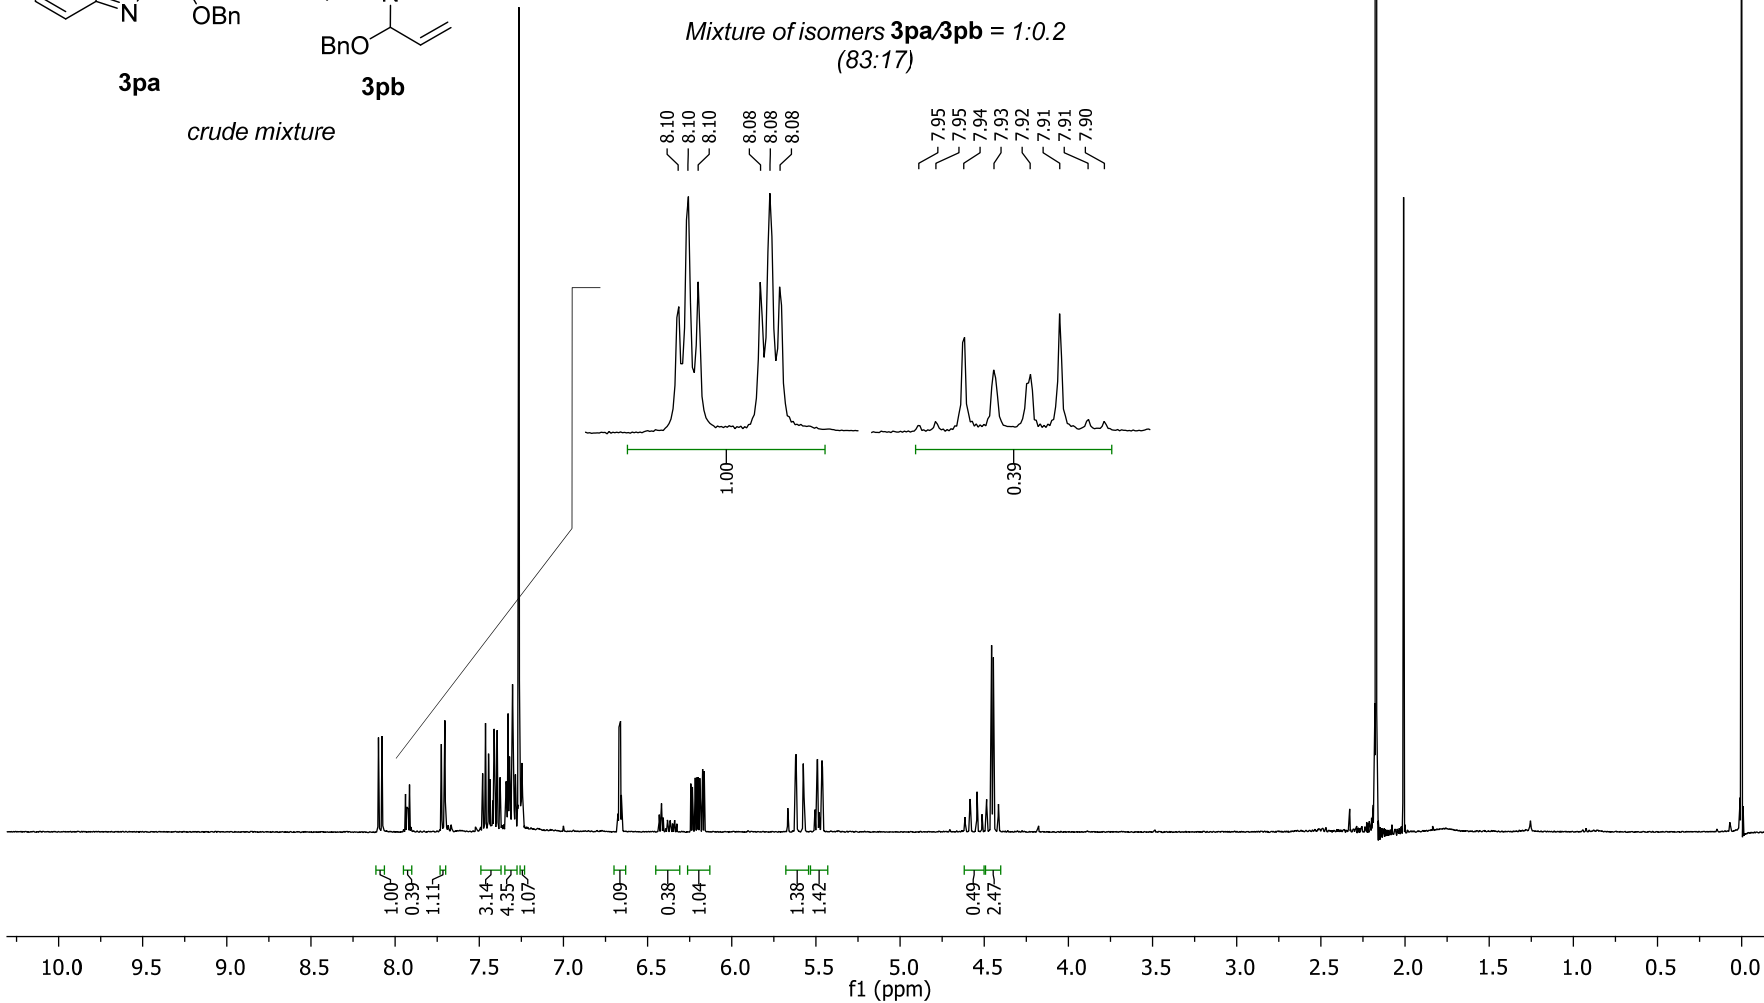

IB022a\_PROTON\_01

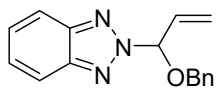

3pa

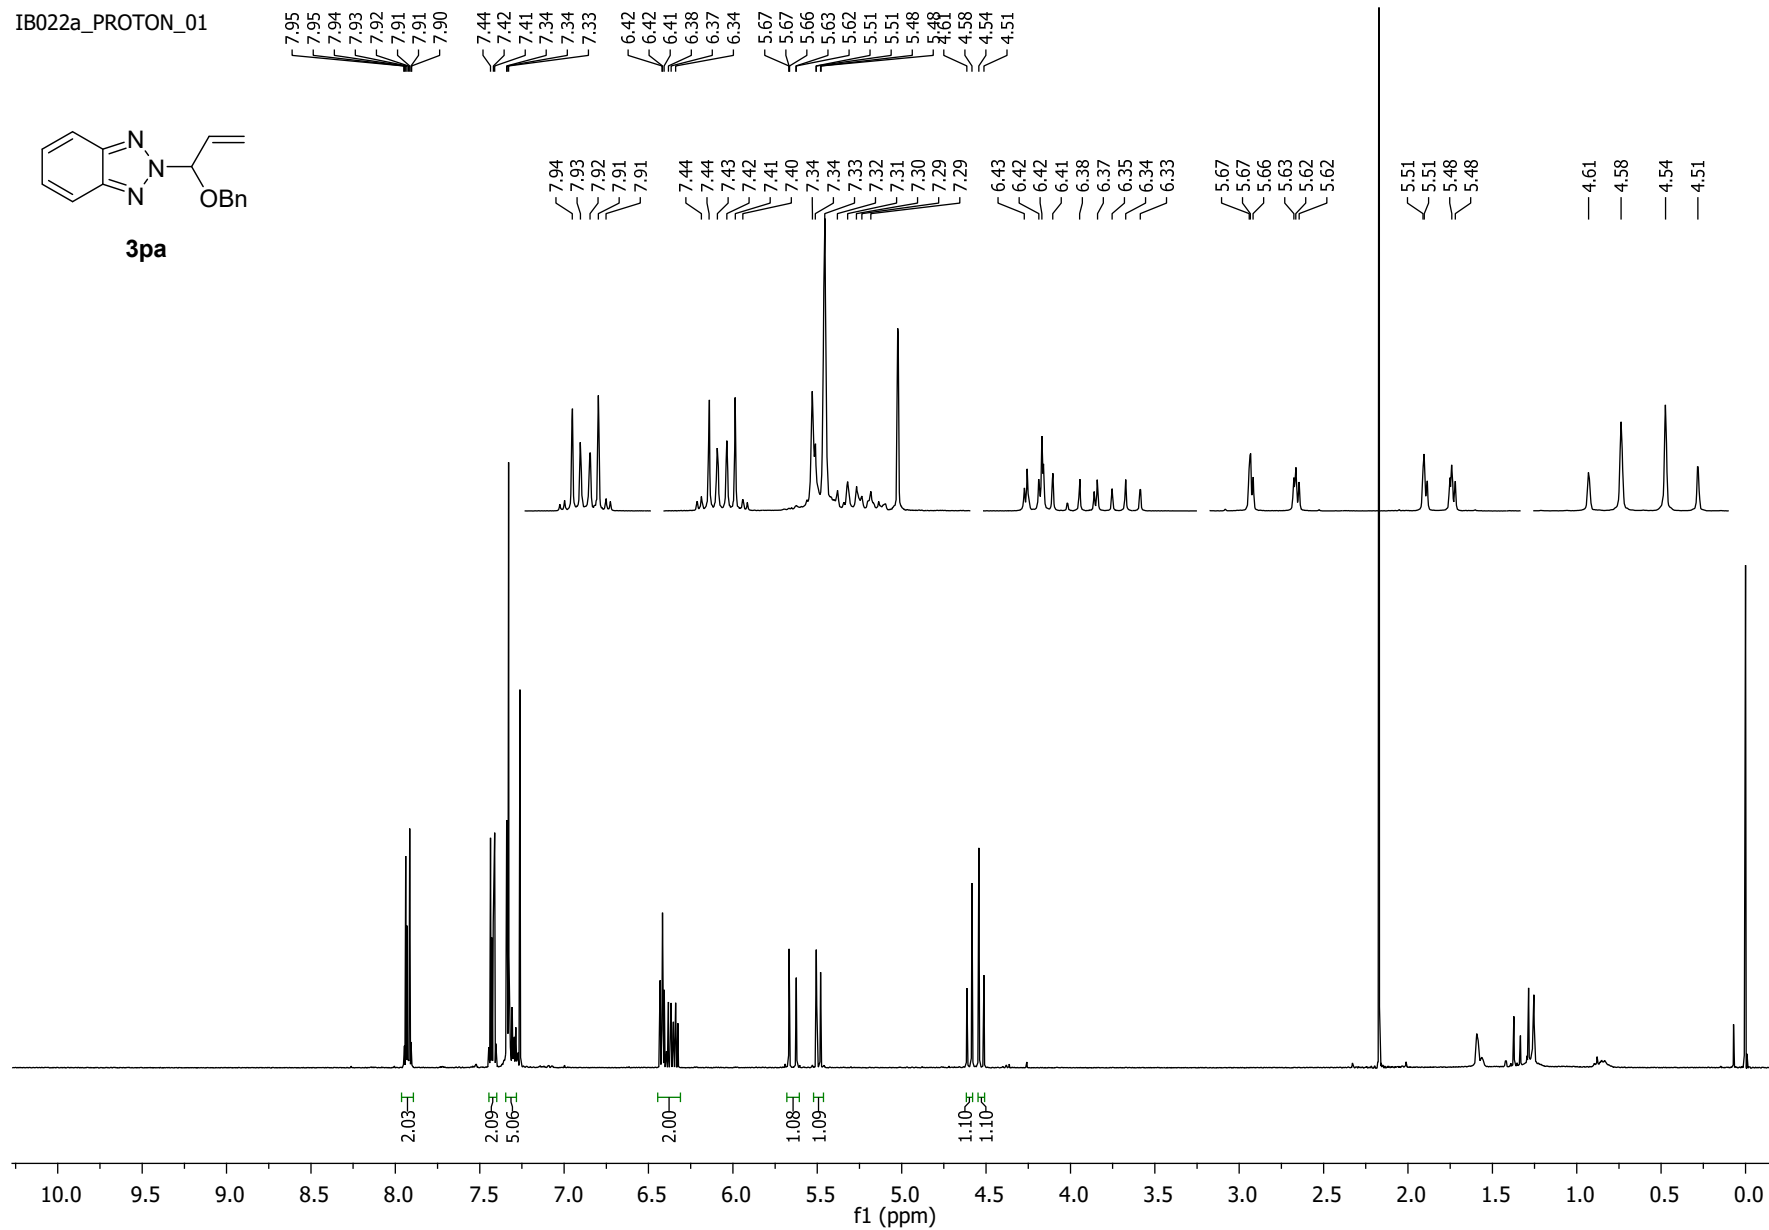

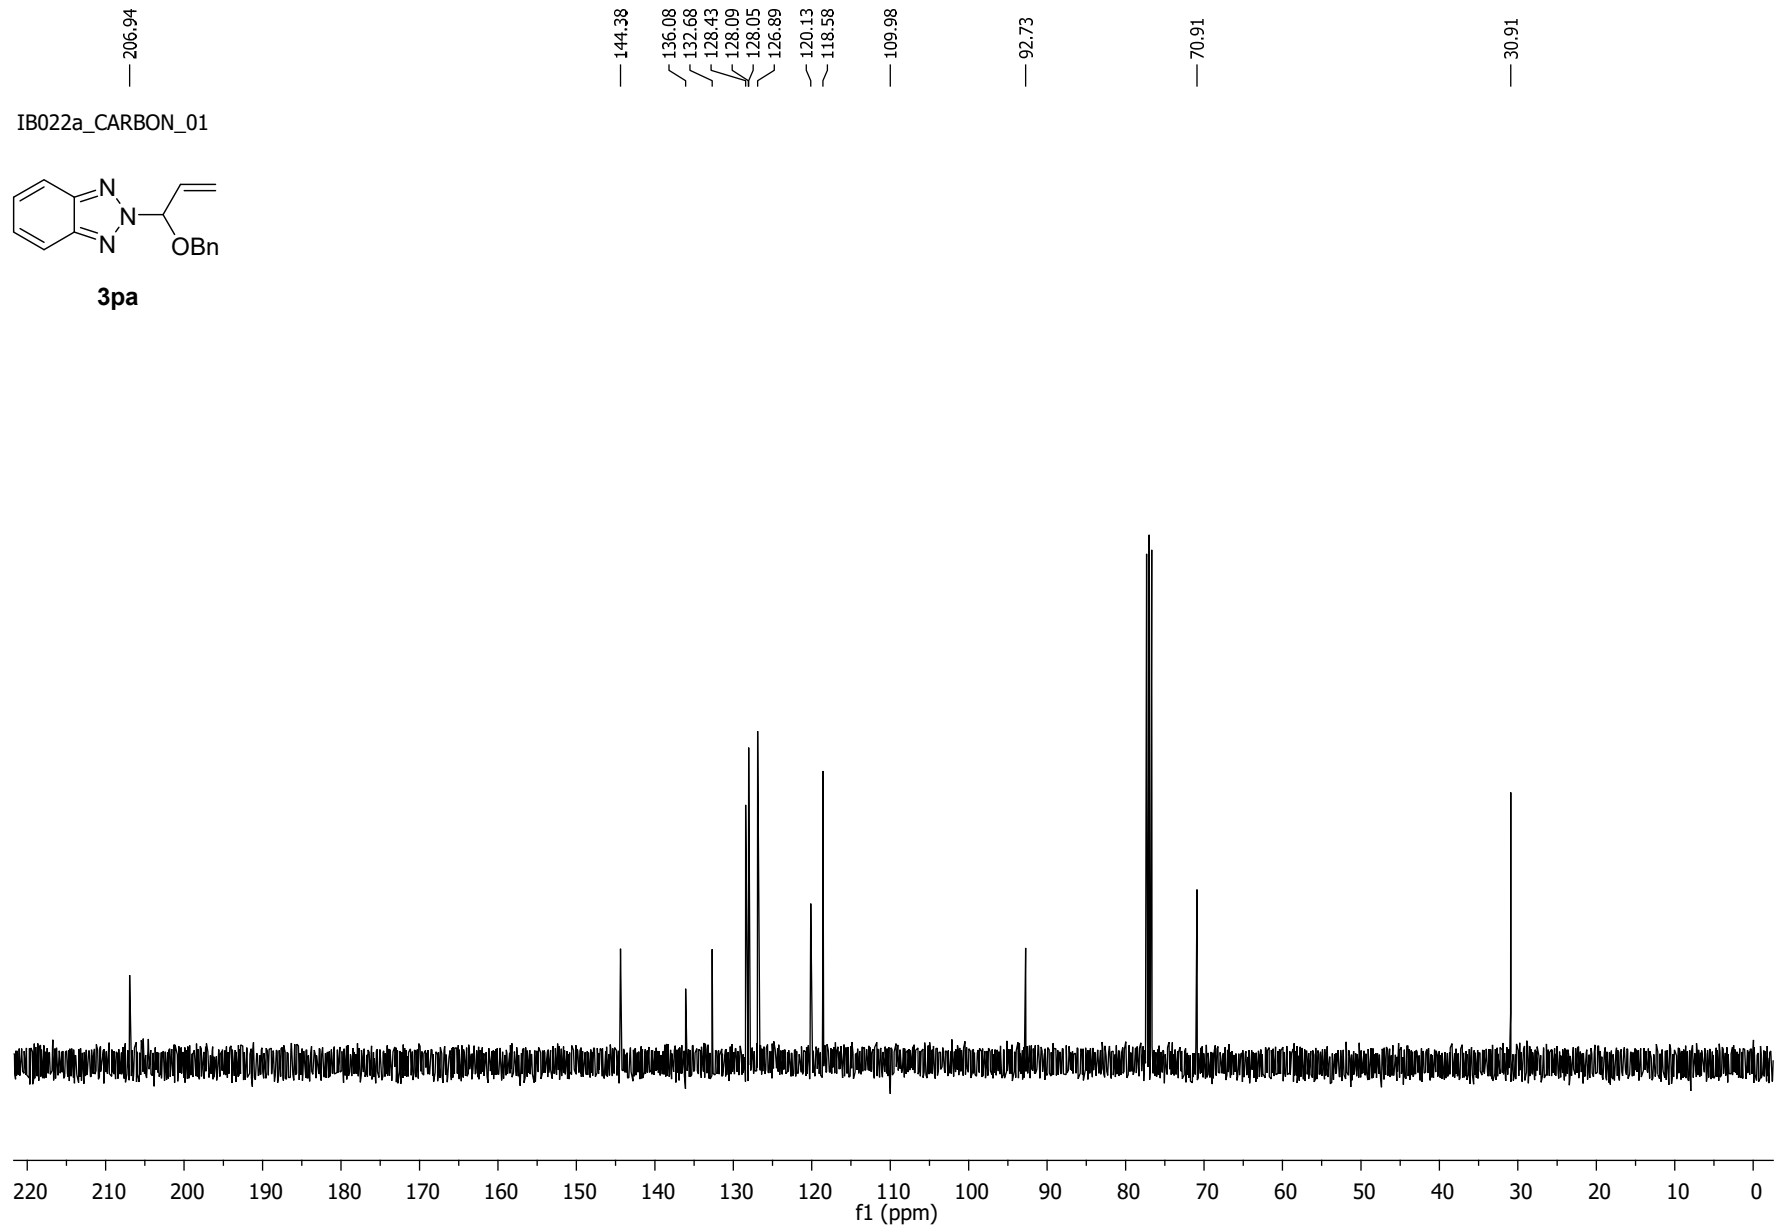

IB022b\_PROTON\_01

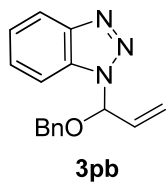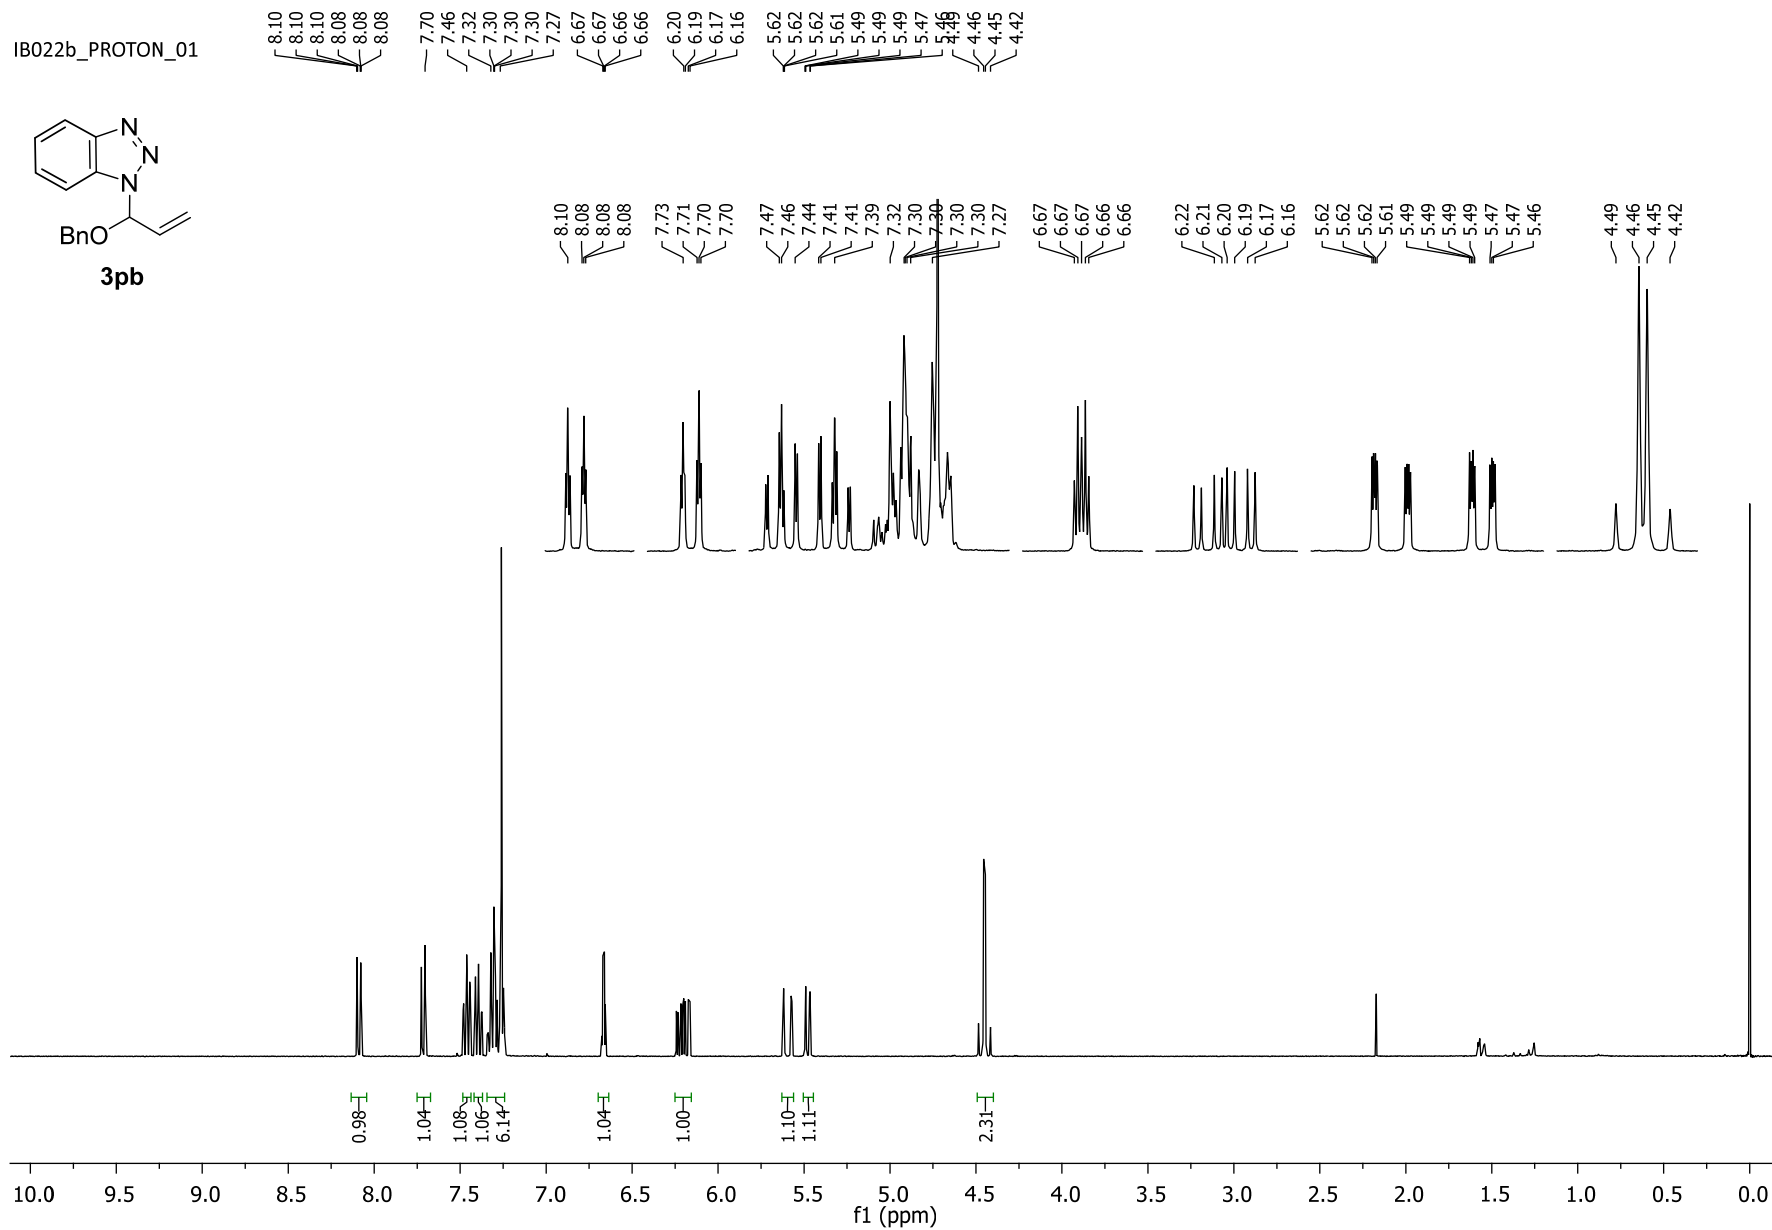

IB022b\_CARBON\_01



136.05  
132.50  
128.48  
128.15  
128.06  
127.51  
124.30  
120.02  
119.80  
111.68  
109.84  
87.65  
70.44

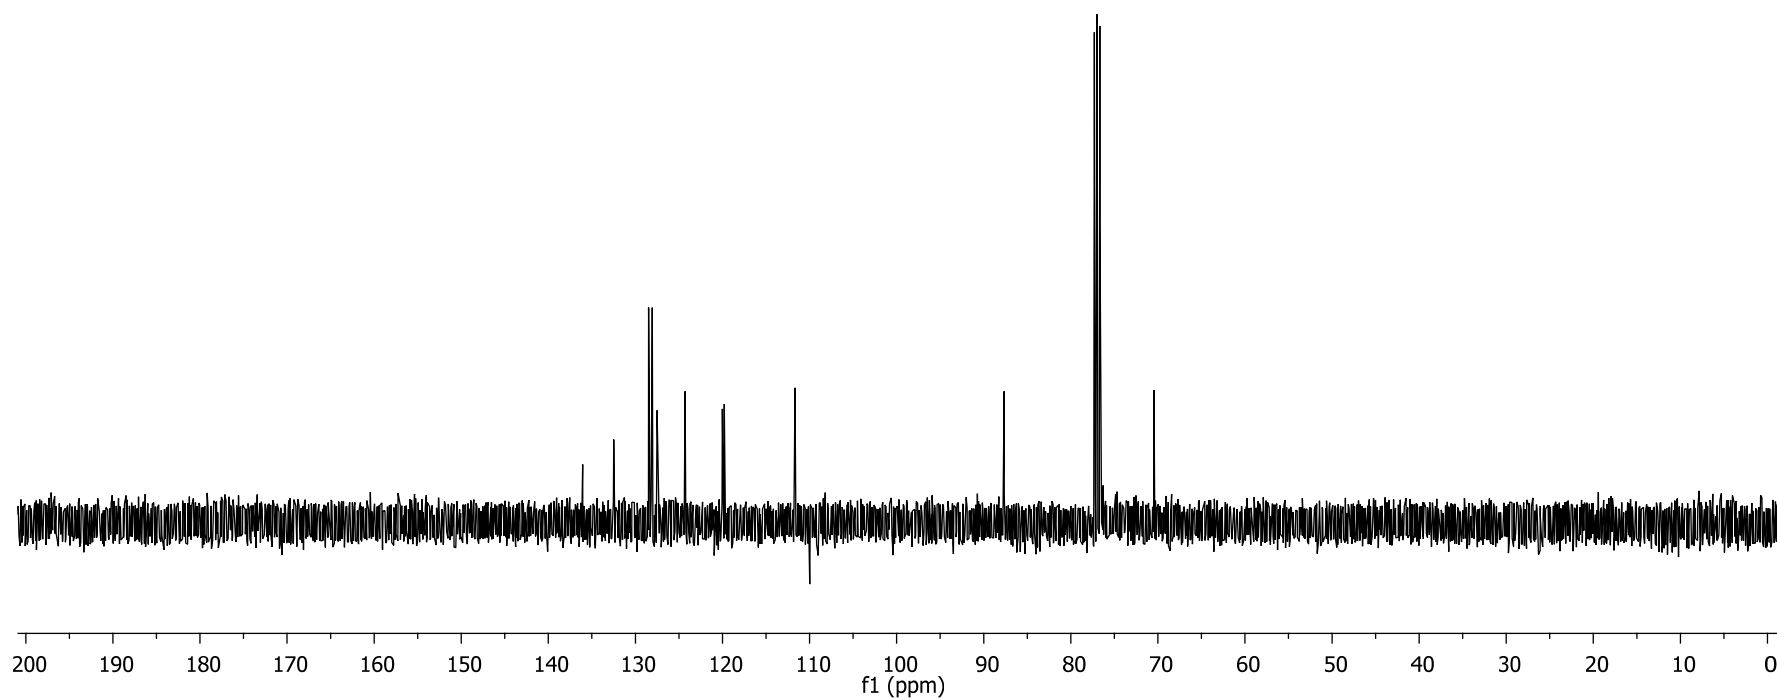

IB011-4\_PROTON\_01

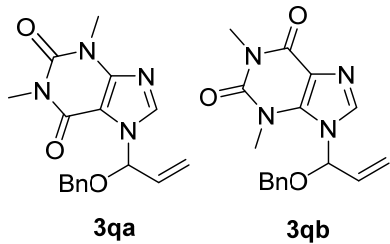

*crude mixture*

Mixture of isomers **3qa/3qb** = 1.0:0.05  
(95:5)

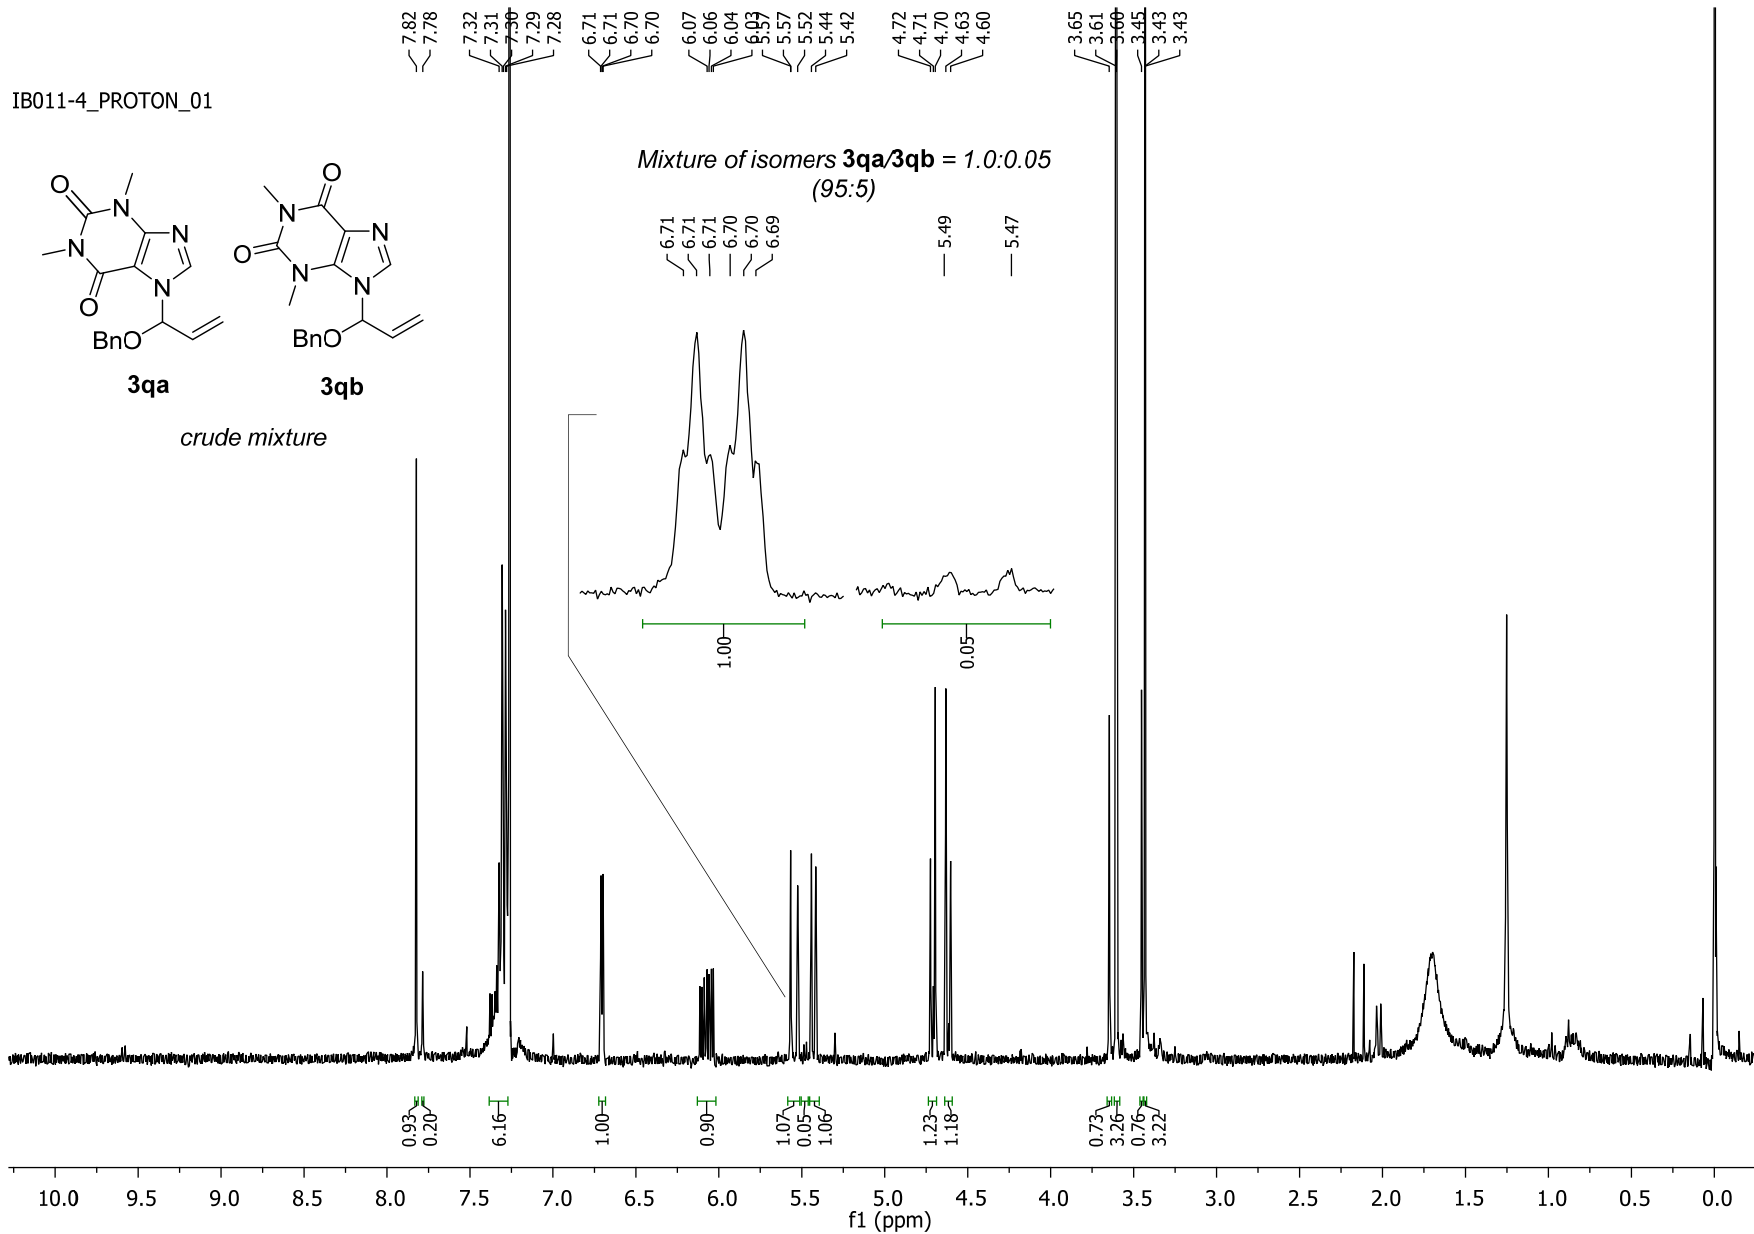

IB012full\_PROTON\_01

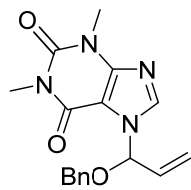

3qa

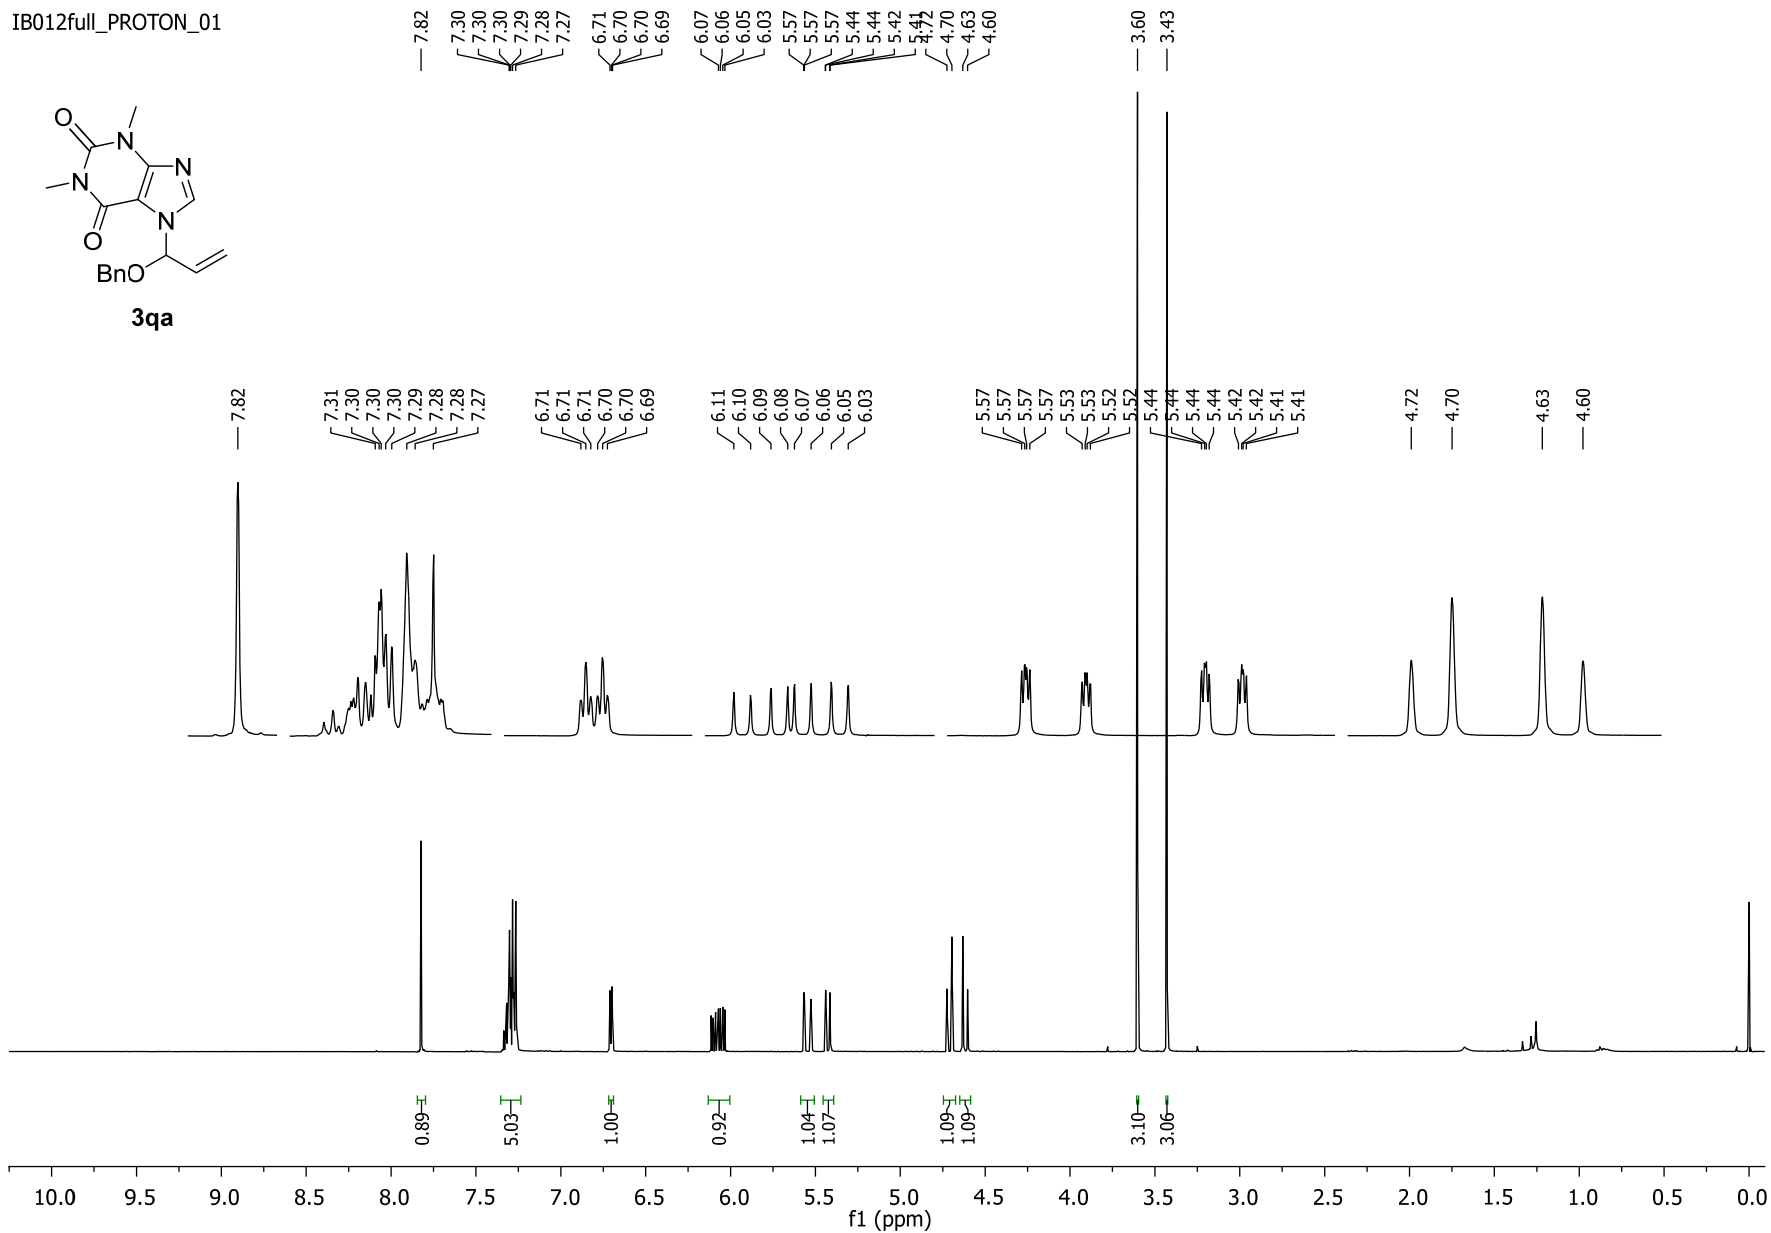



IB012full\_CARBON\_01

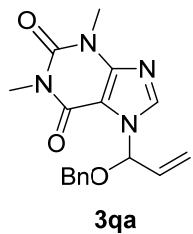

155.22  
151.46  
148.63  
139.48  
136.26  
133.59  
128.45  
128.15  
127.80  
119.66  
106.68  
85.20  
71.61  
29.83  
28.06

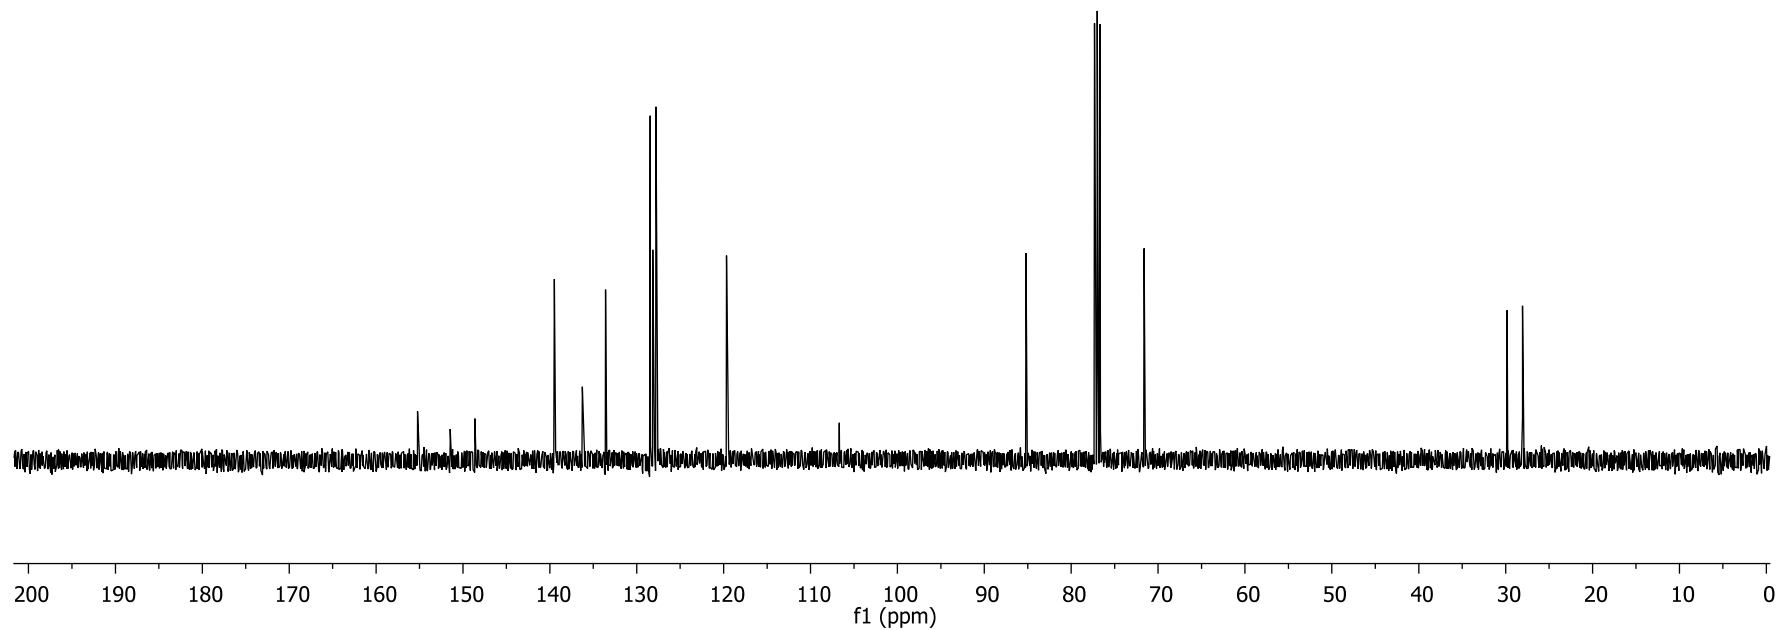

IB283-1F2Full\_PROTON\_01

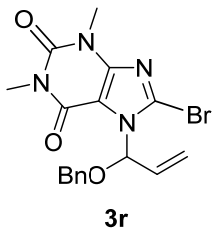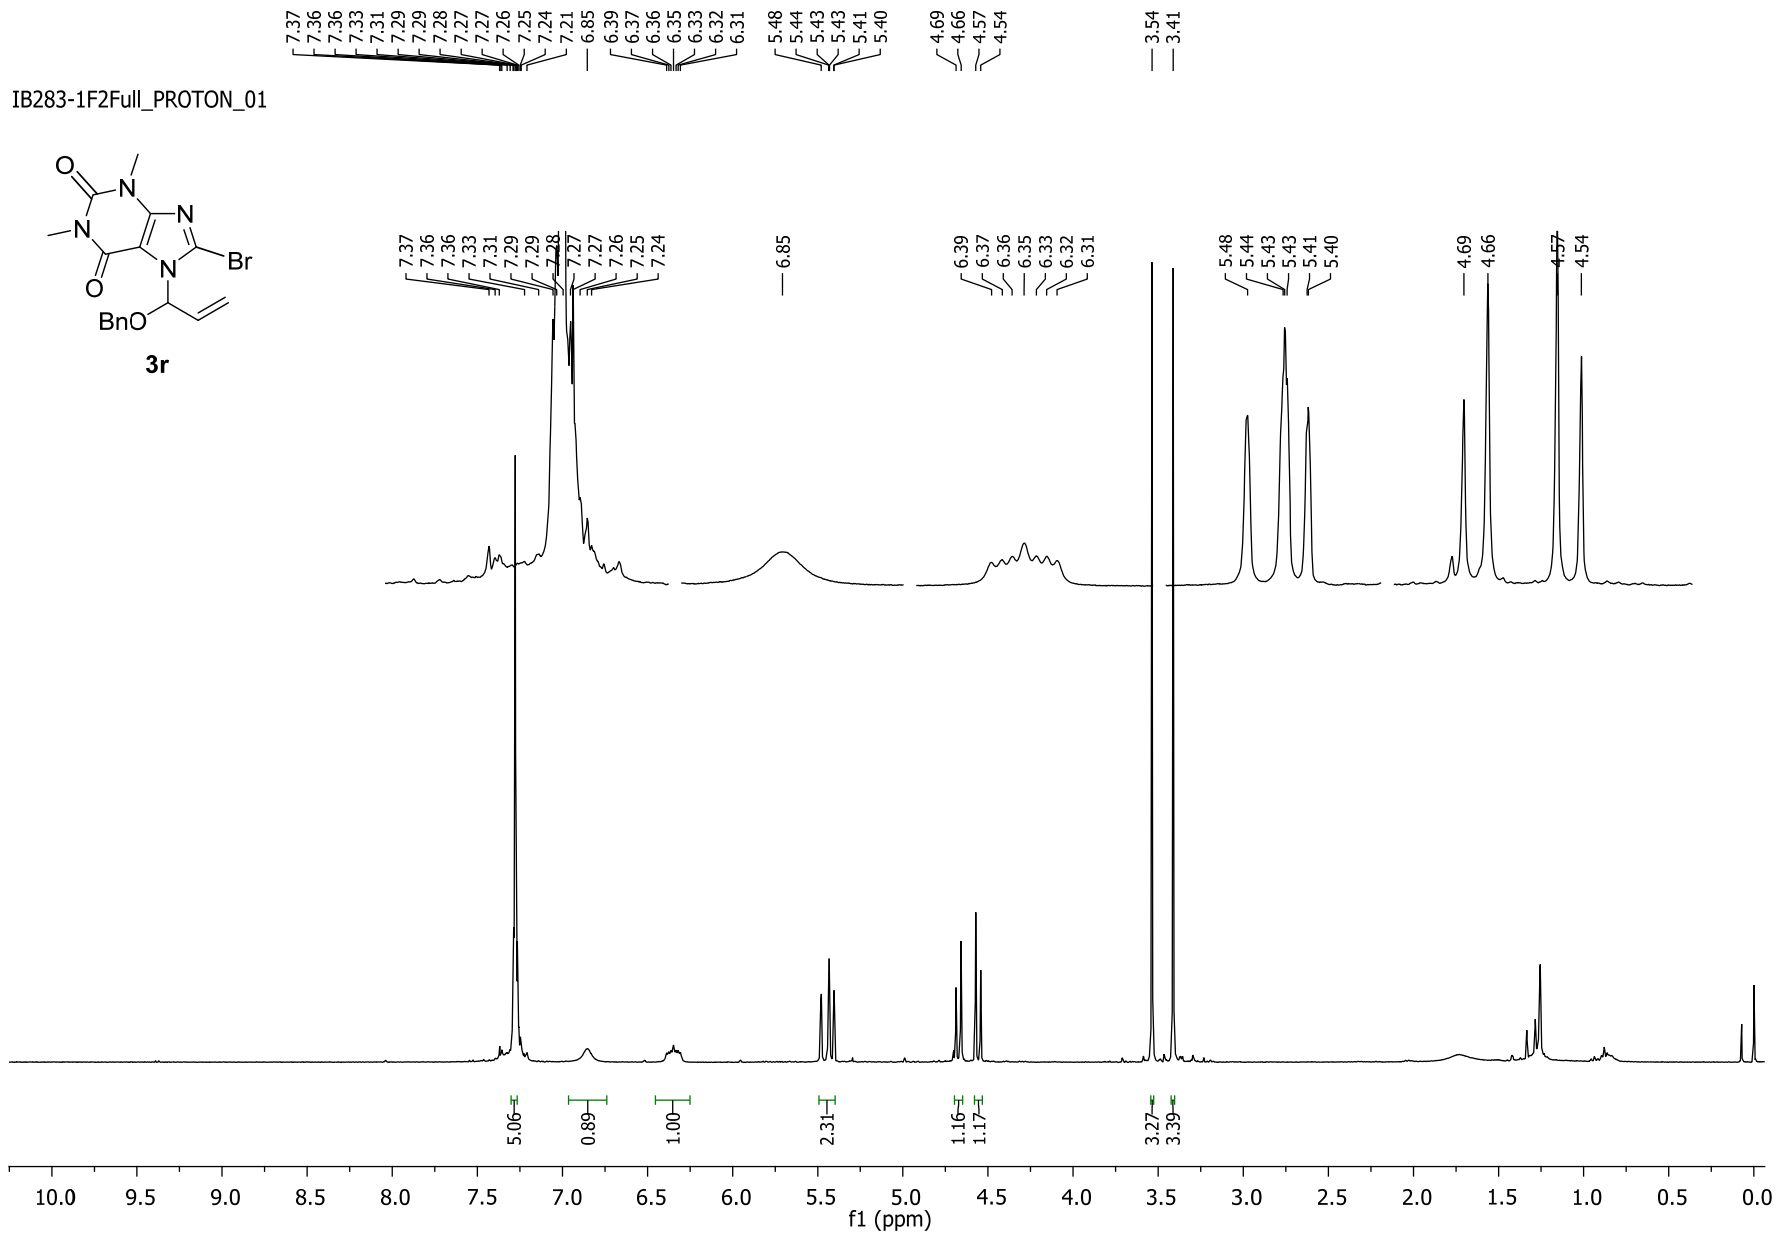

IB283-1F2Full\_CARBON\_01

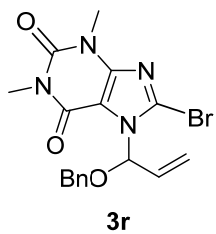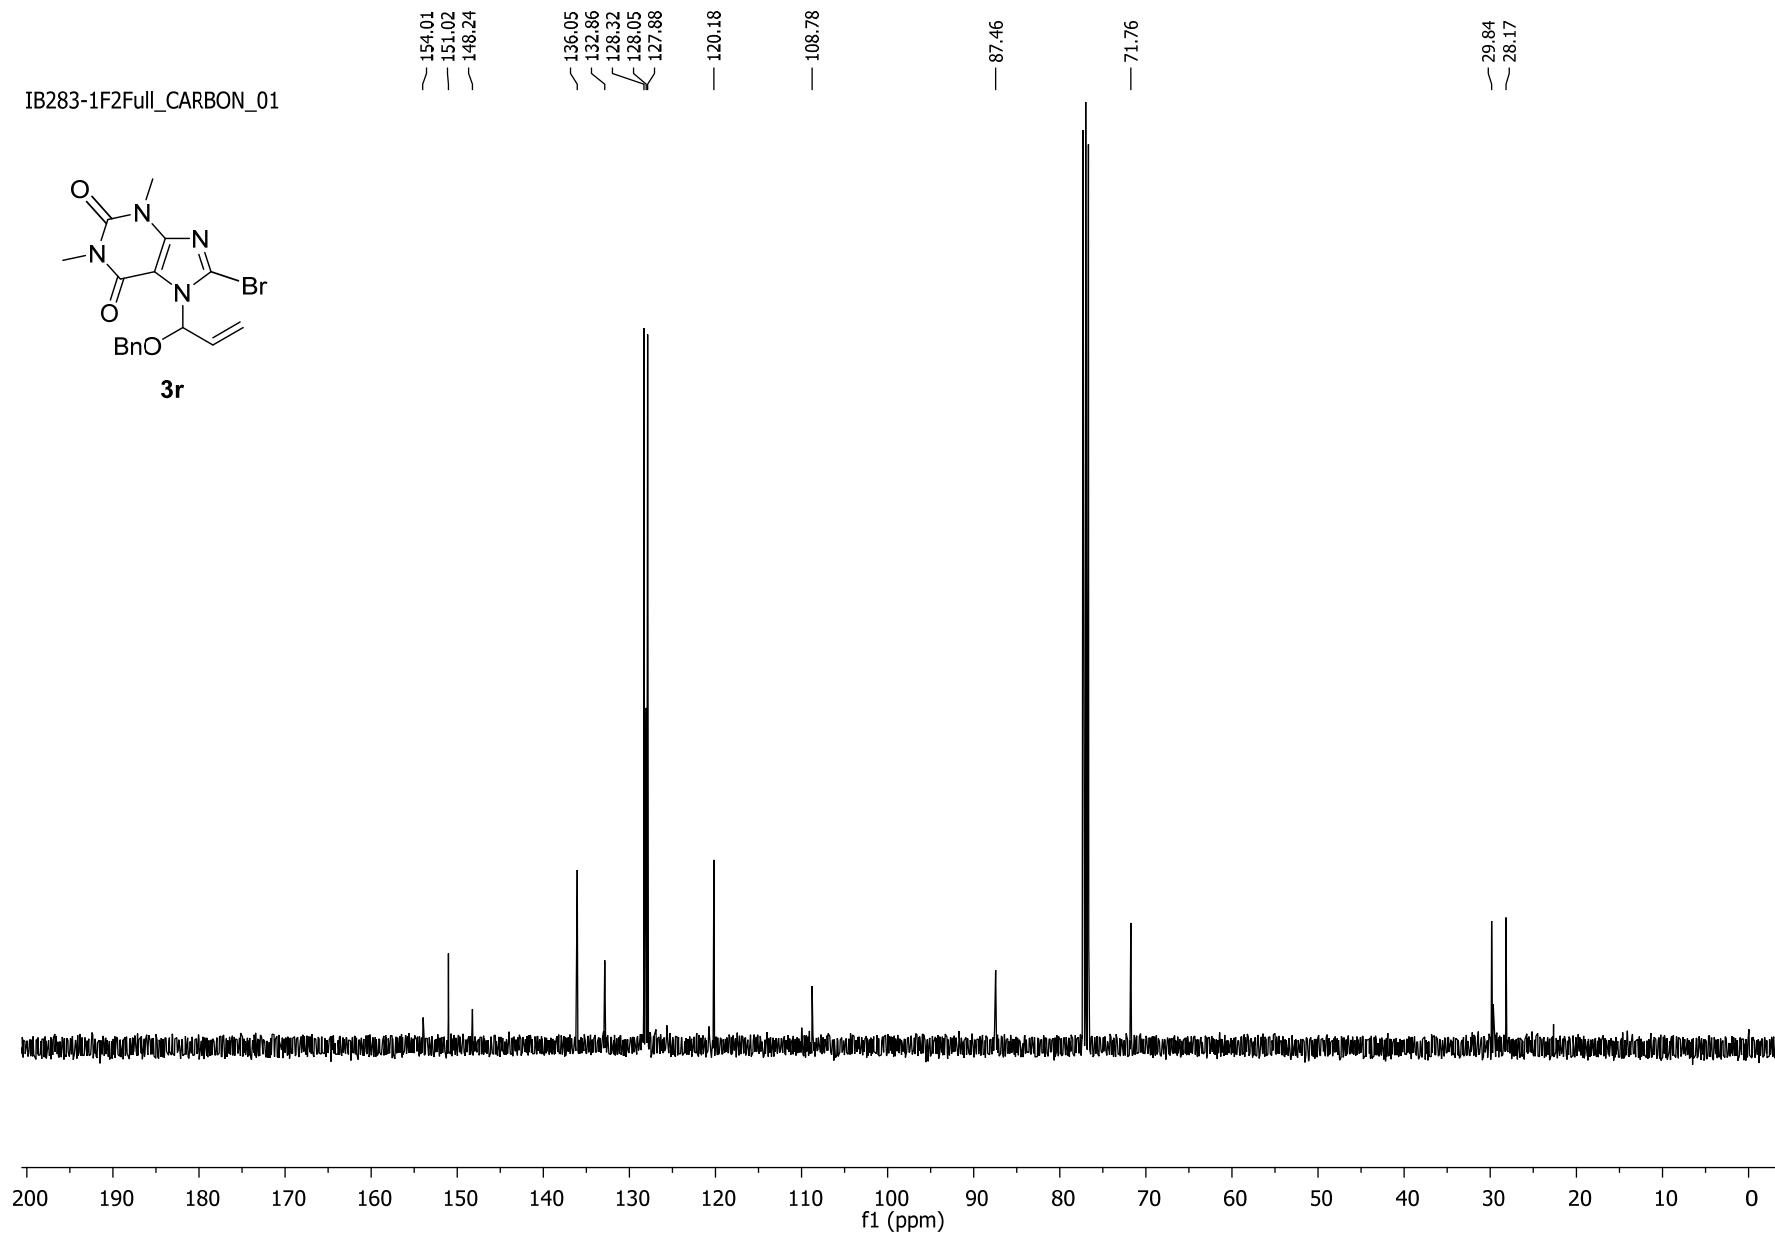

IB265-1F1Full\_PROTON\_01

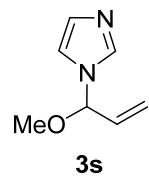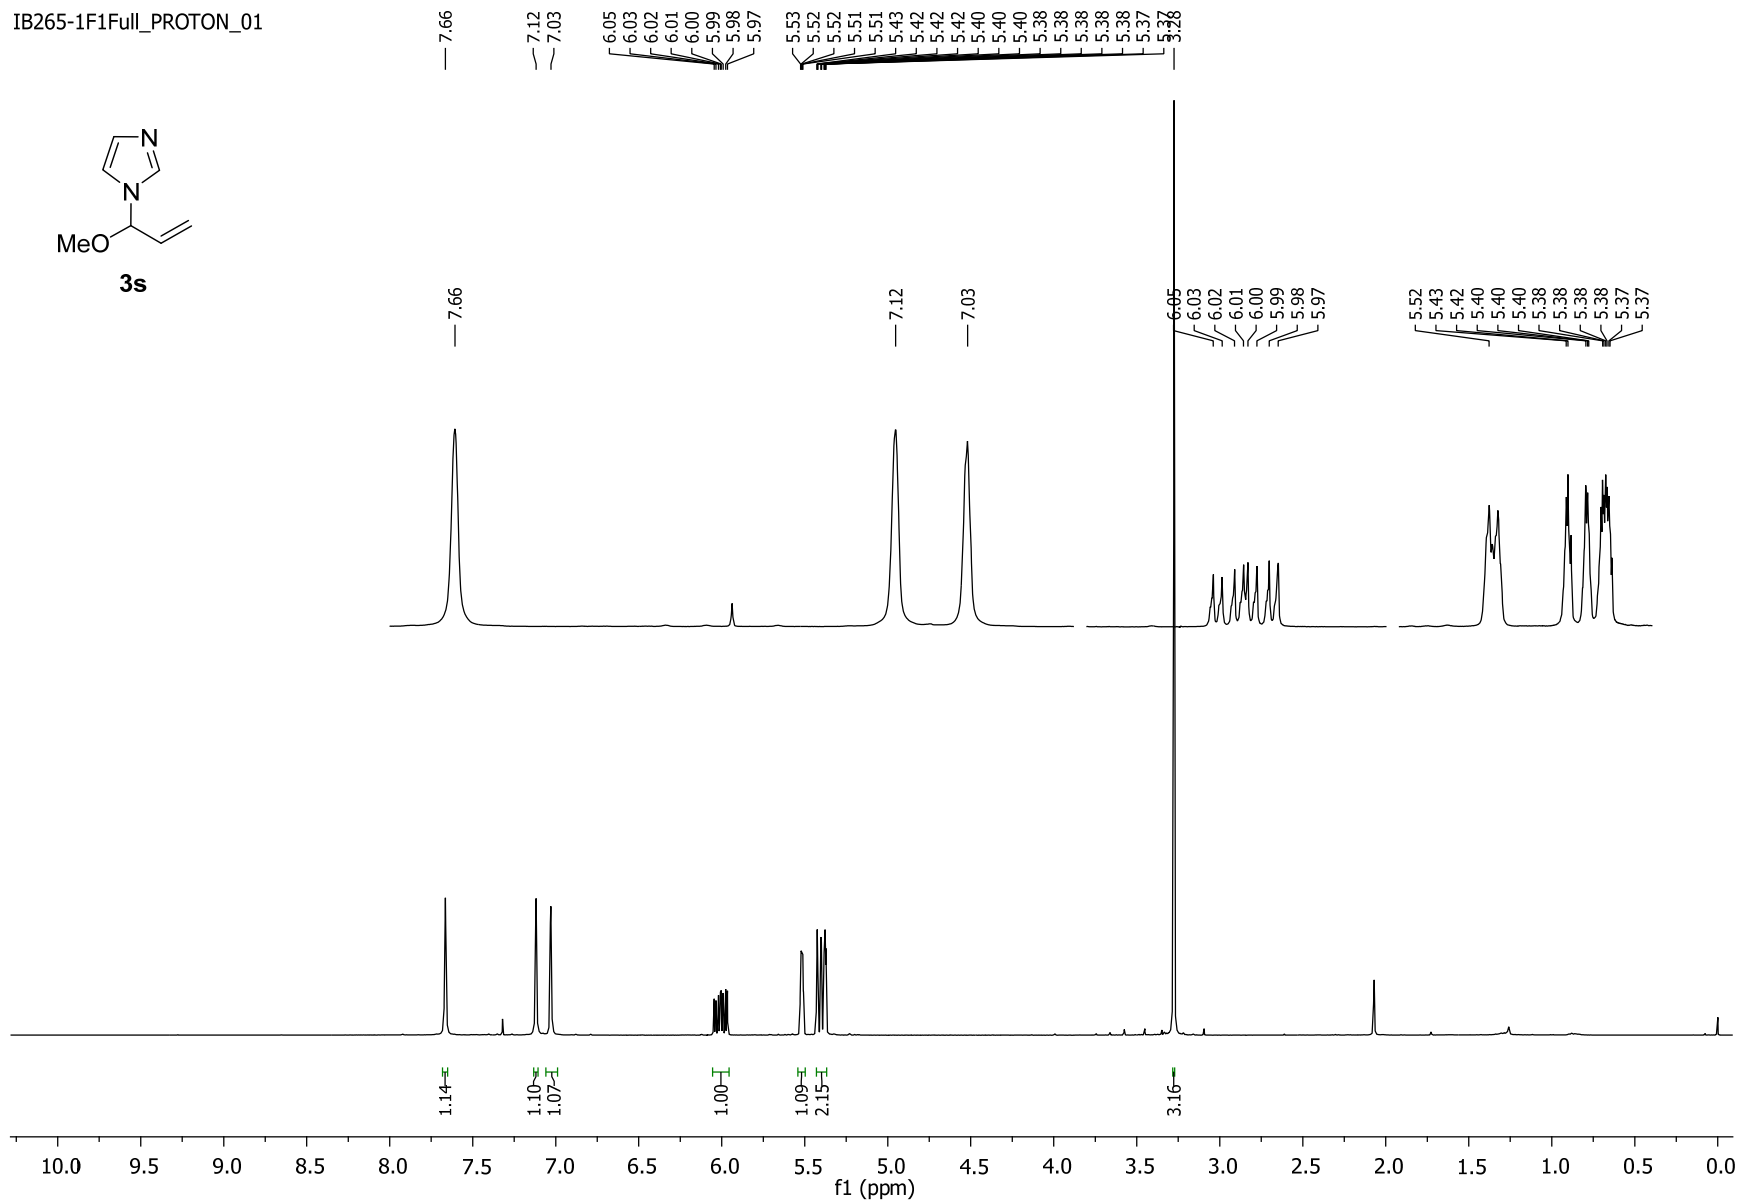

IB265-1F1Full\_CARBON\_01

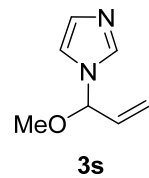

136.16  
133.92  
129.70  
118.99  
116.75  
87.31  
55.69

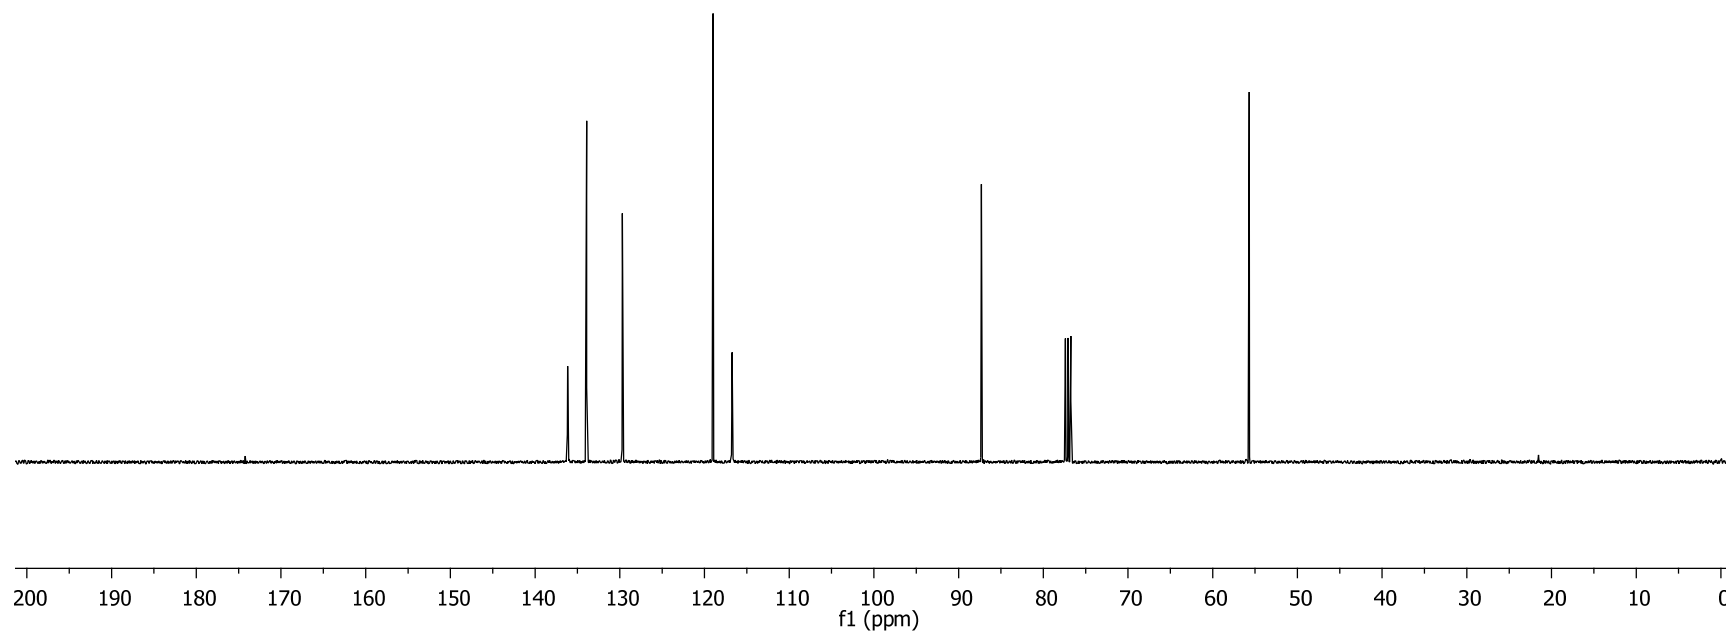

IB268-1F1Full\_PROTON\_01

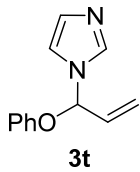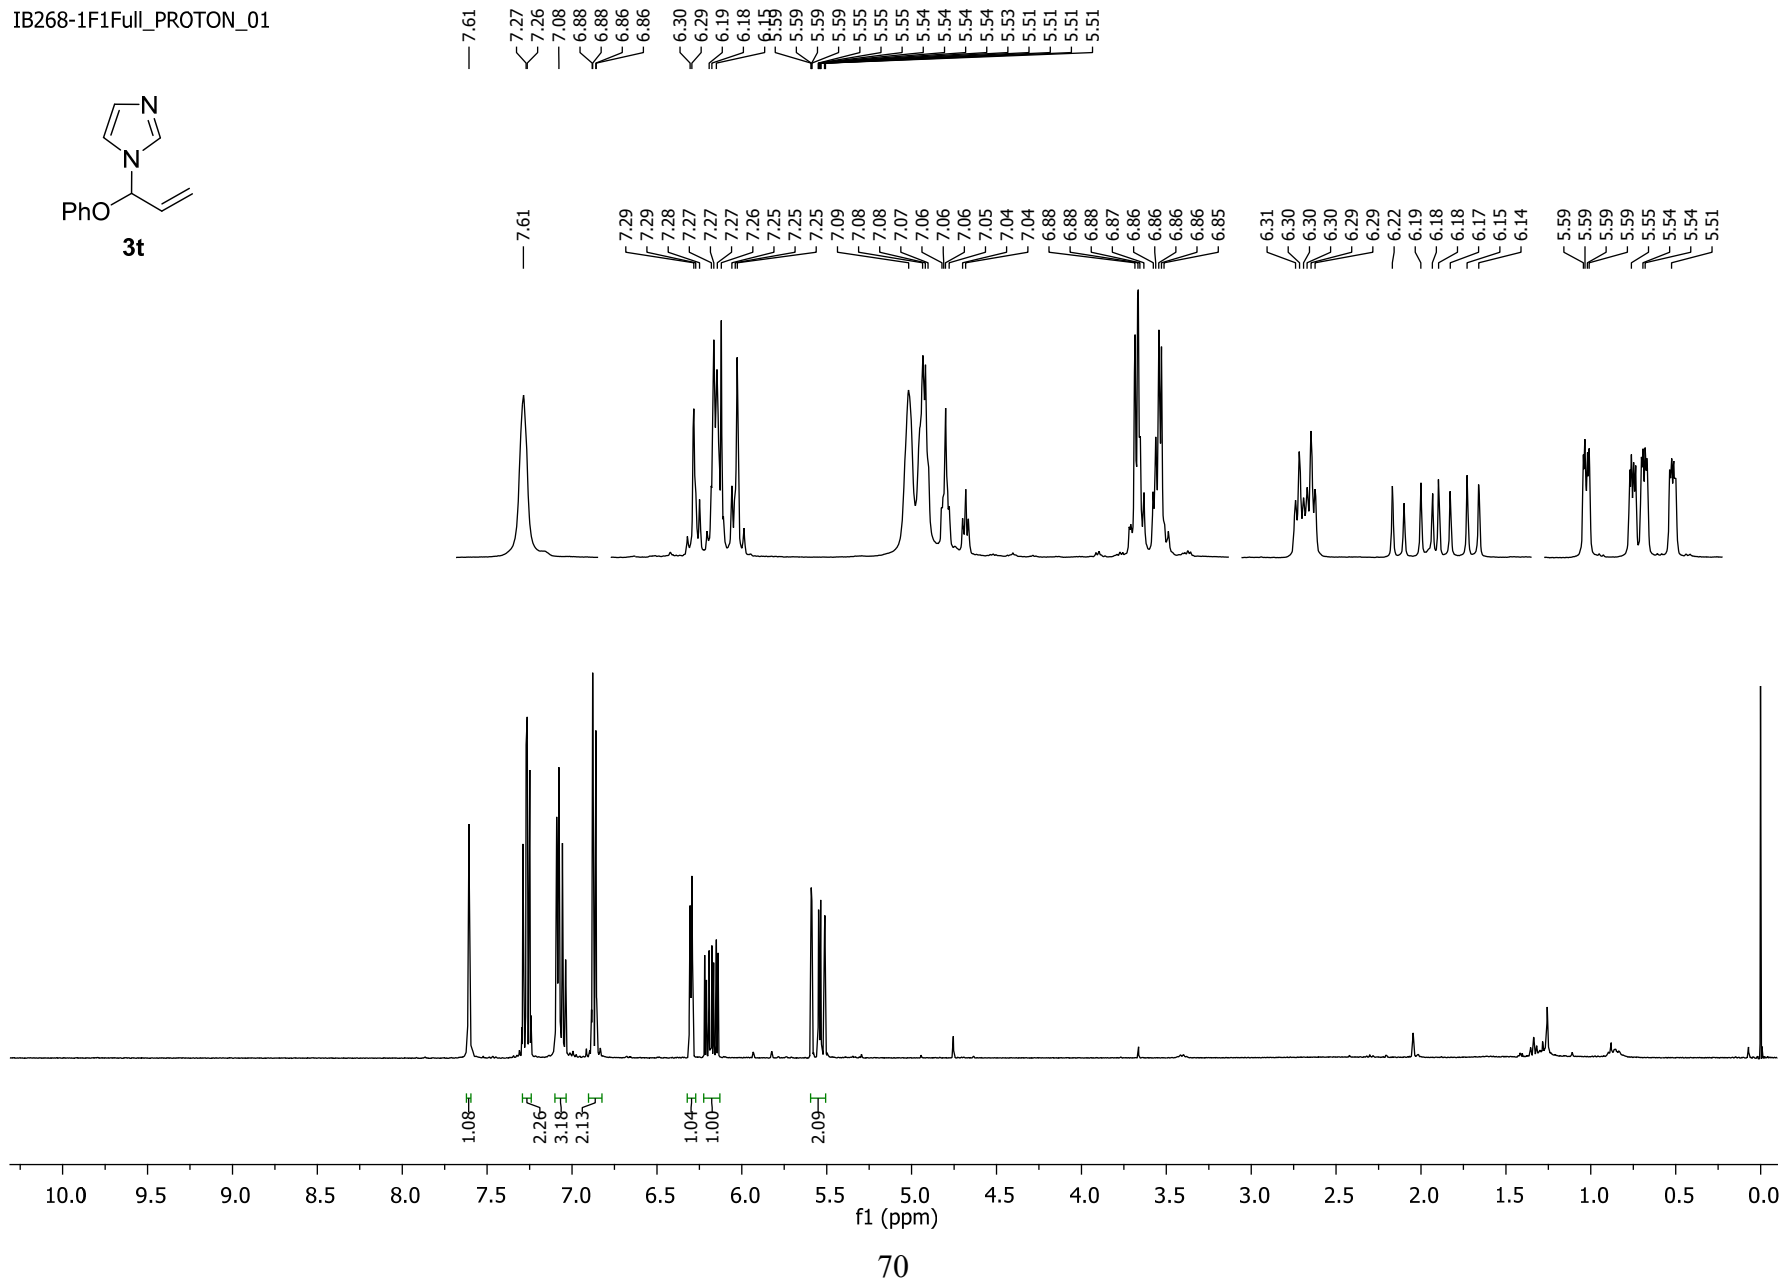

IB268-1F1Full\_CARBON\_01

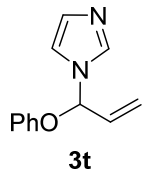

— 155.92

— 136.03

— 133.28

— 129.94

— 129.77

— 123.58

— 119.86

— 117.67

— 116.90

— 85.19

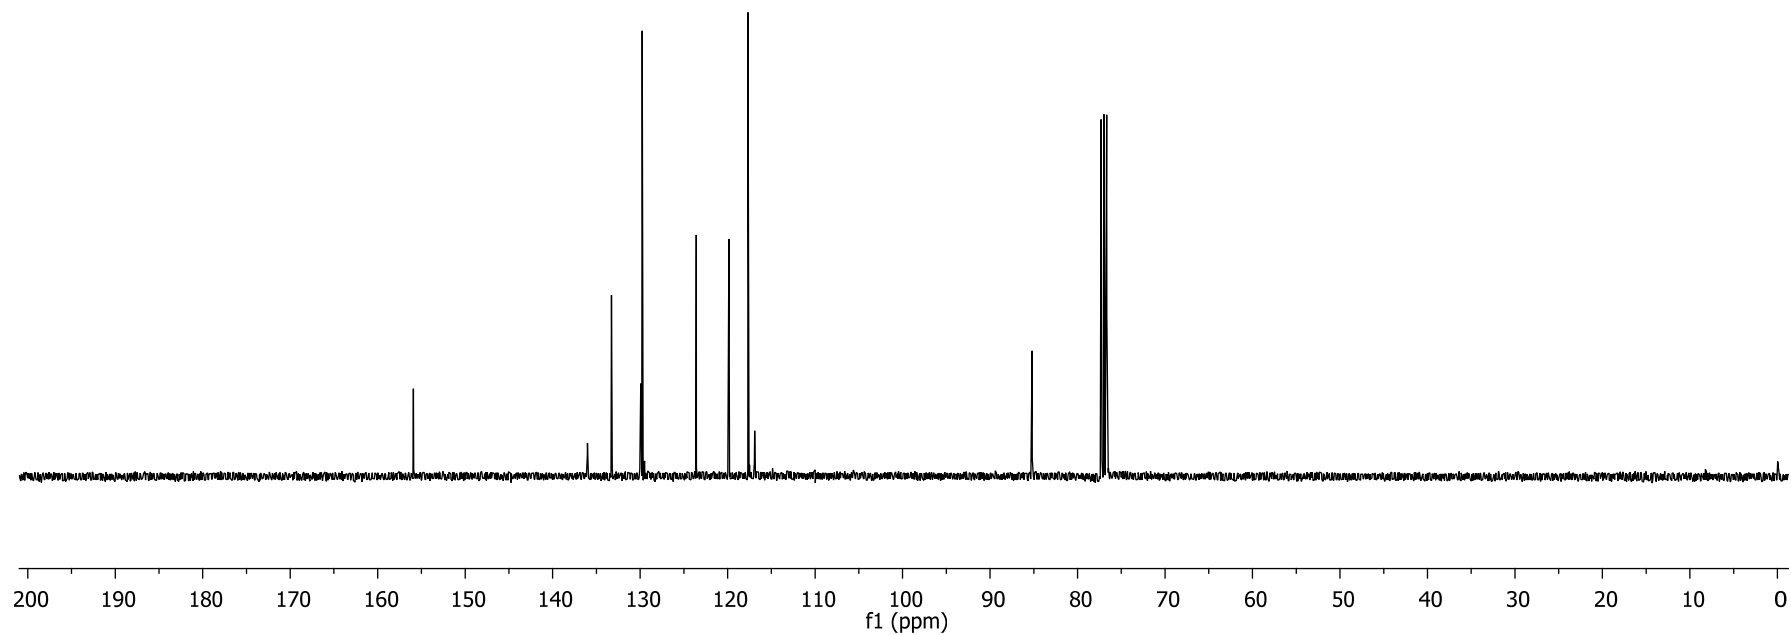

IB272-1Full\_PROTON\_01

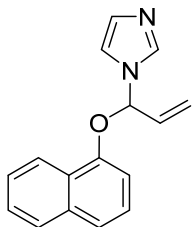

3u

8.14  
8.13  
8.13  
8.12  
8.11  
7.56  
7.54  
7.51  
7.51  
7.50  
7.49  
7.32  
7.30  
6.73  
6.46  
6.45  
6.45  
6.45  
6.44  
5.73  
5.73  
5.69  
5.68  
5.62  
5.61  
5.59  
5.59

8.14  
8.13  
8.13  
8.12  
8.11  
7.83  
7.83  
7.82  
7.81  
7.81  
7.56  
7.54  
7.51  
7.51  
7.50  
7.49  
7.48  
7.32  
7.30  
7.28  
7.14  
7.11  
6.75  
6.73  
6.46  
6.46  
6.45  
6.45  
6.45  
6.44  
6.34  
6.33  
6.31  
6.30  
6.30  
6.28  
6.27  
6.26  
5.73  
5.73  
5.69  
5.68  
5.62  
5.61  
5.59  
5.59

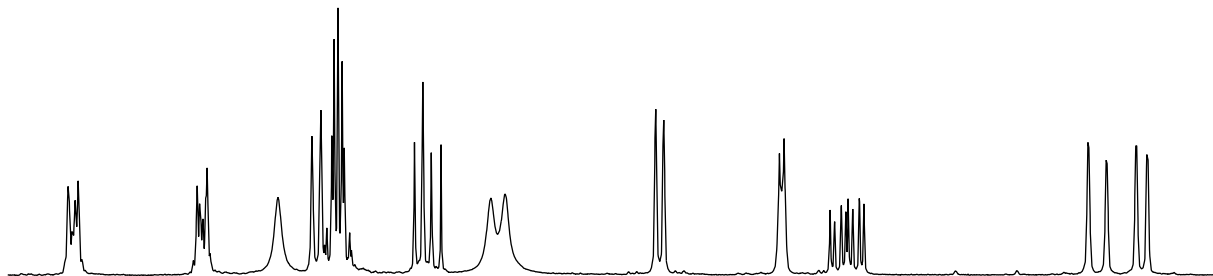

1.00  
1.00  
1.02  
1.04  
2.13  
1.07  
2.15  
1.04  
1.02  
1.01  
1.05  
1.03

10.0 9.5 9.0 8.5 8.0 7.5 7.0 6.5 6.0 5.5 5.0 4.5 4.0 3.5 3.0 2.5 2.0 1.5 1.0 0.5 0.0

f1 (ppm)



IB272-1Full\_CARBON\_01

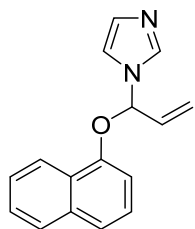

**3u**

— 151.70

134.73  
133.17  
130.04  
127.78  
126.67  
126.34  
126.03  
125.49  
123.36  
121.46  
120.10

— 110.52

— 85.27

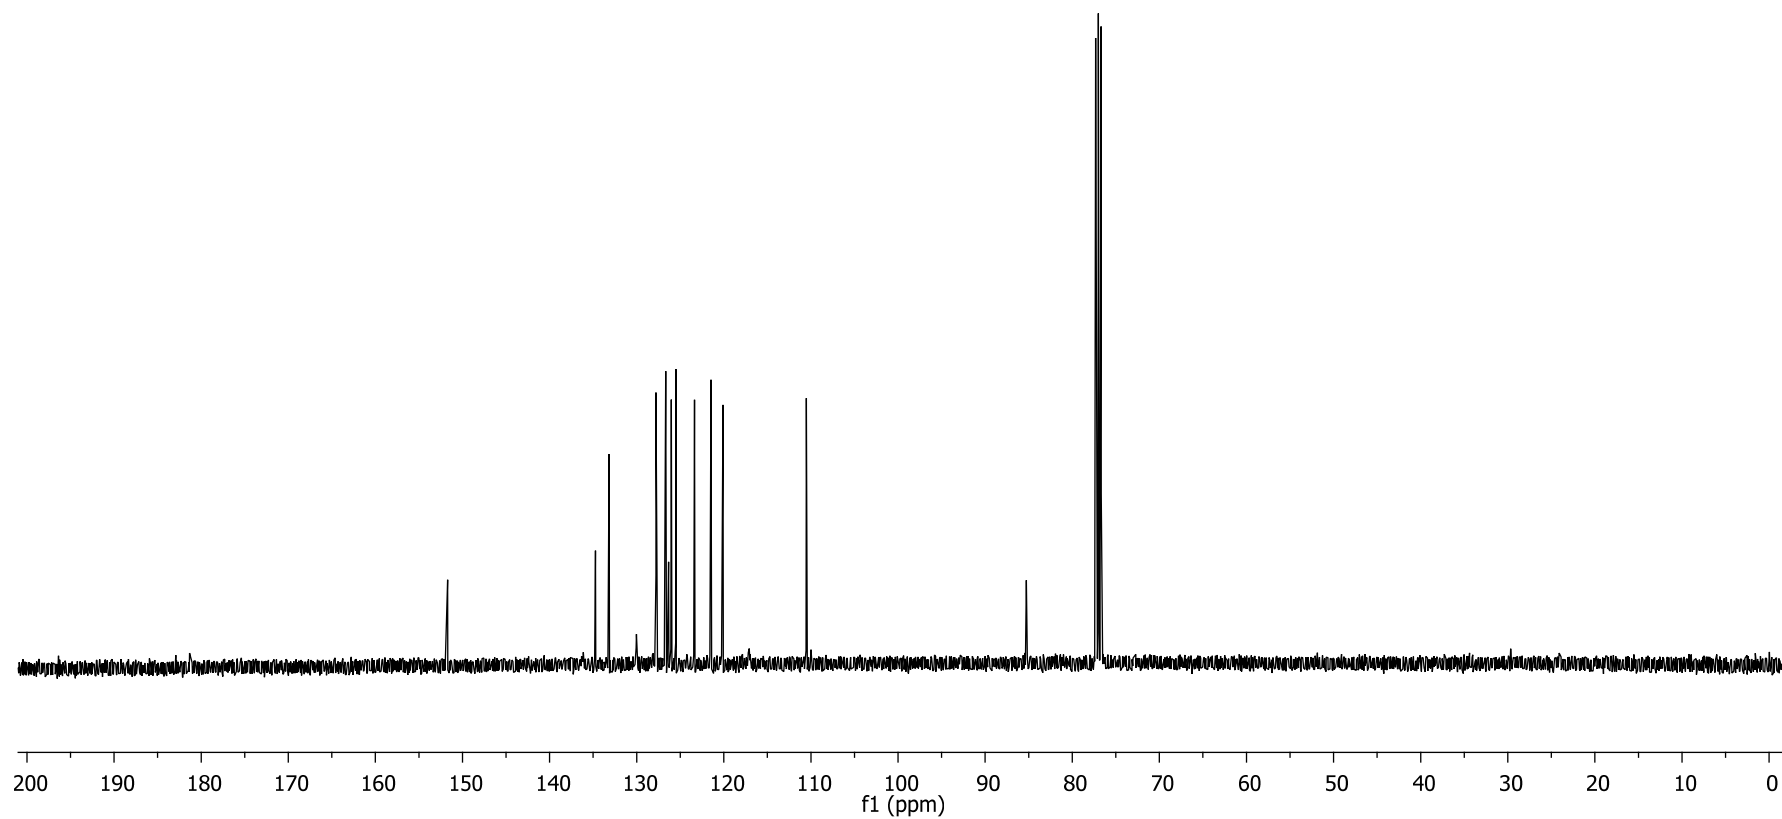

IB298-1F2Full\_PROTON\_01

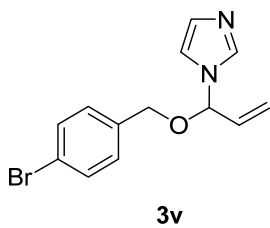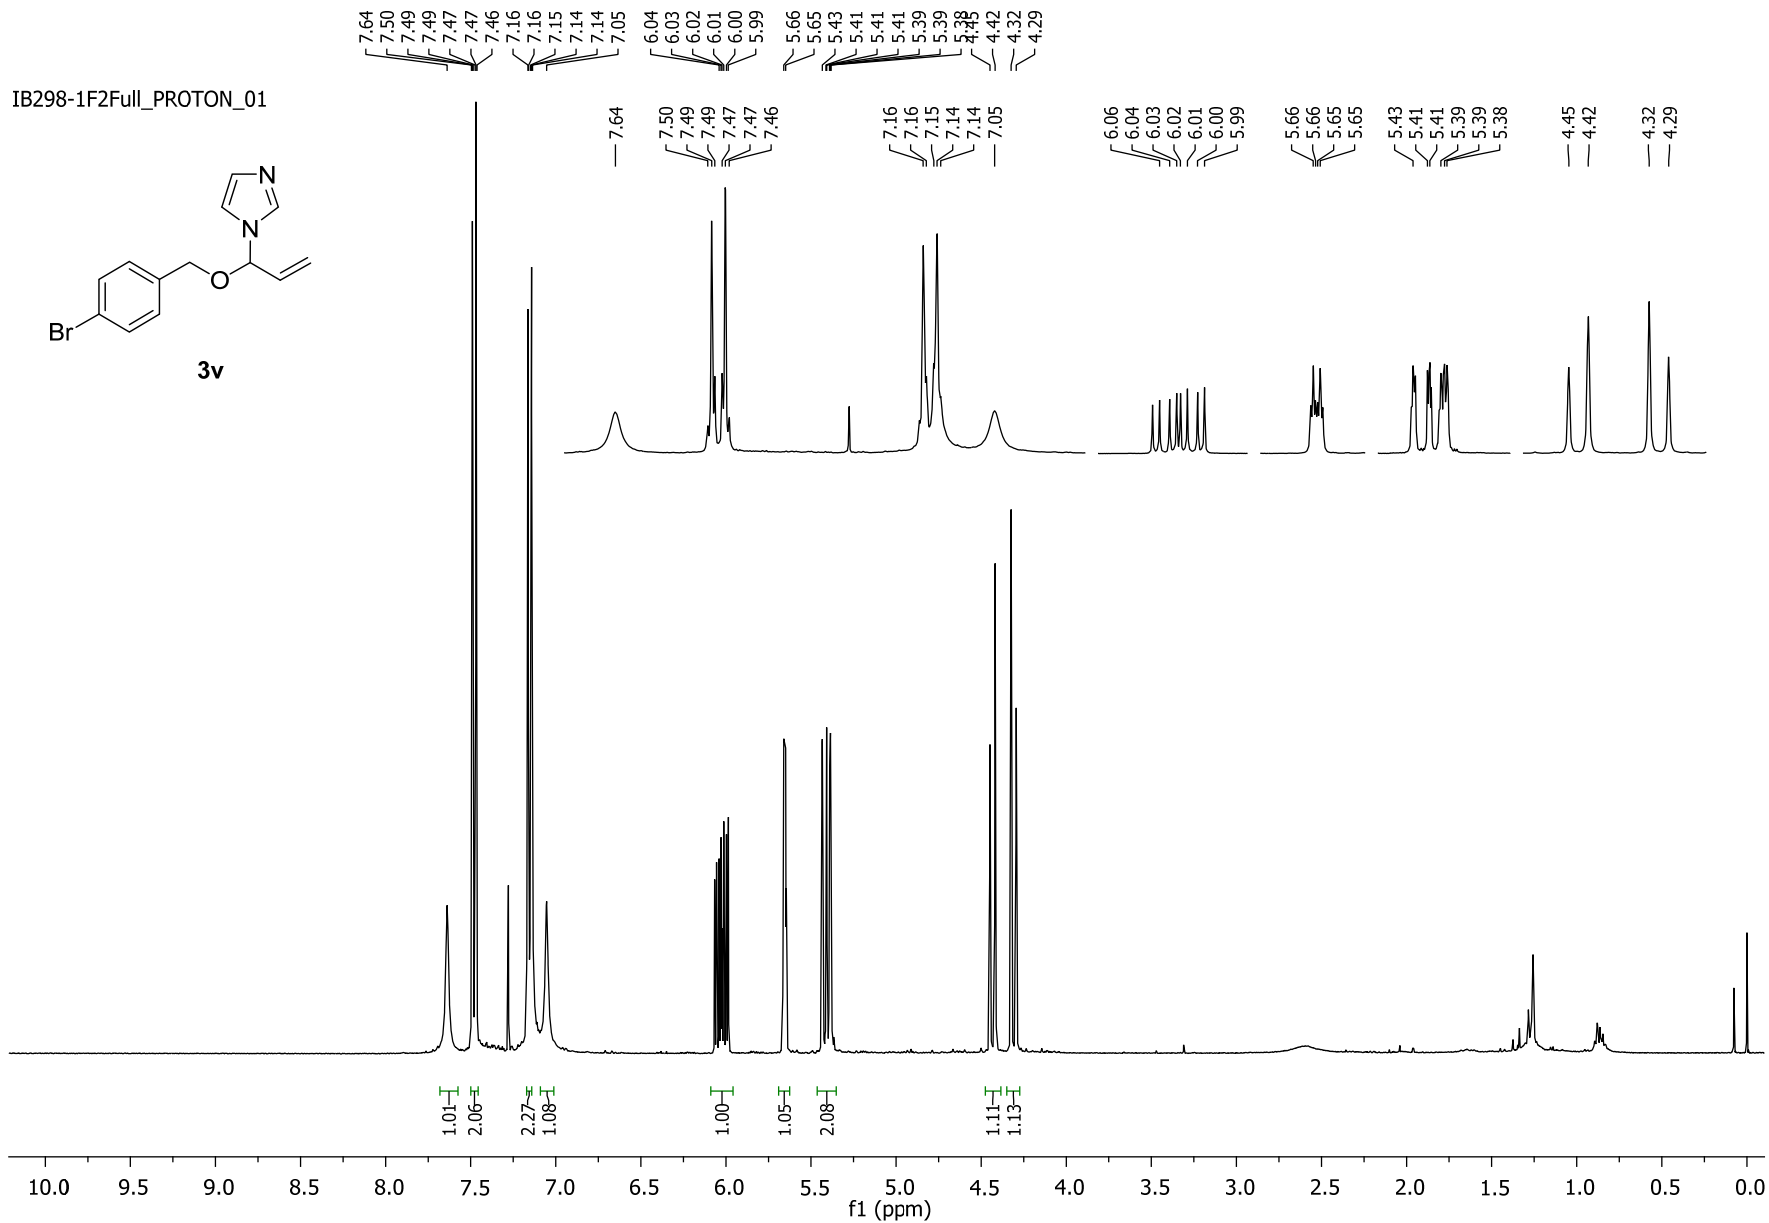

IB298-1F2Full\_CARBON\_01

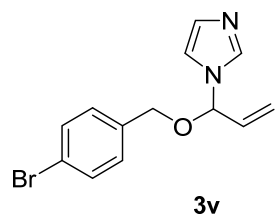

135.25  
133.89  
131.73  
130.15  
129.43  
122.14  
119.16  
116.82

84.62

68.94

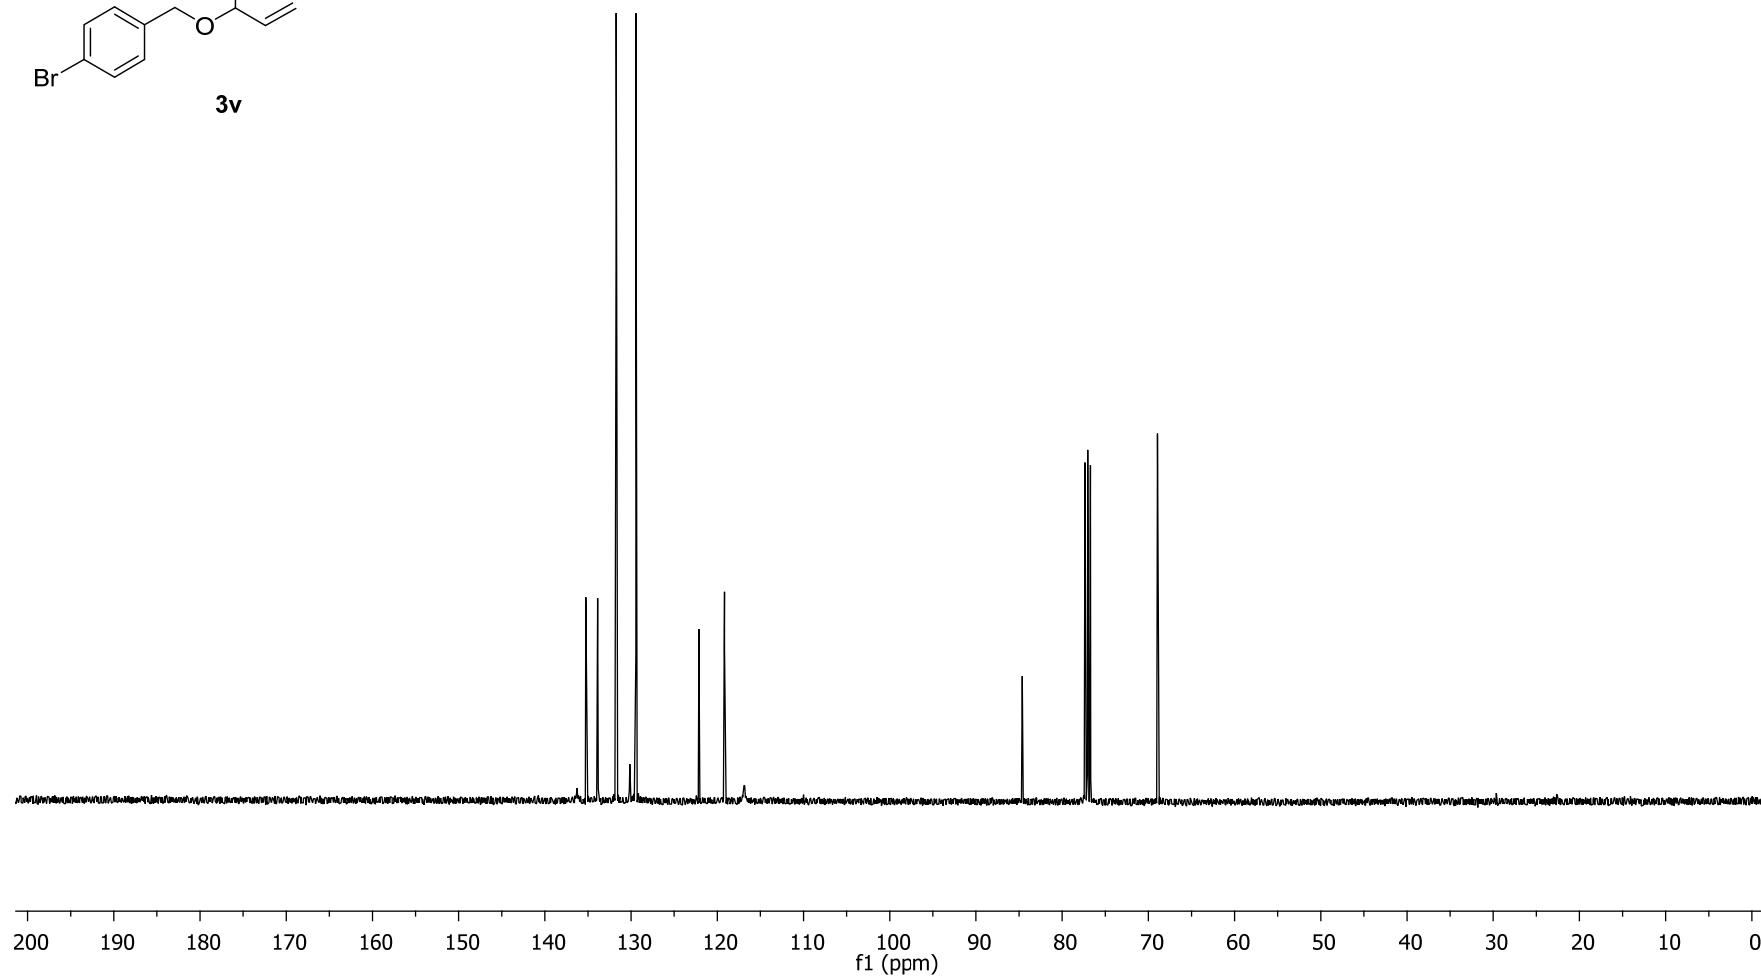

IB282-1F1Full\_PROTON\_01

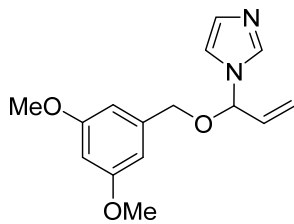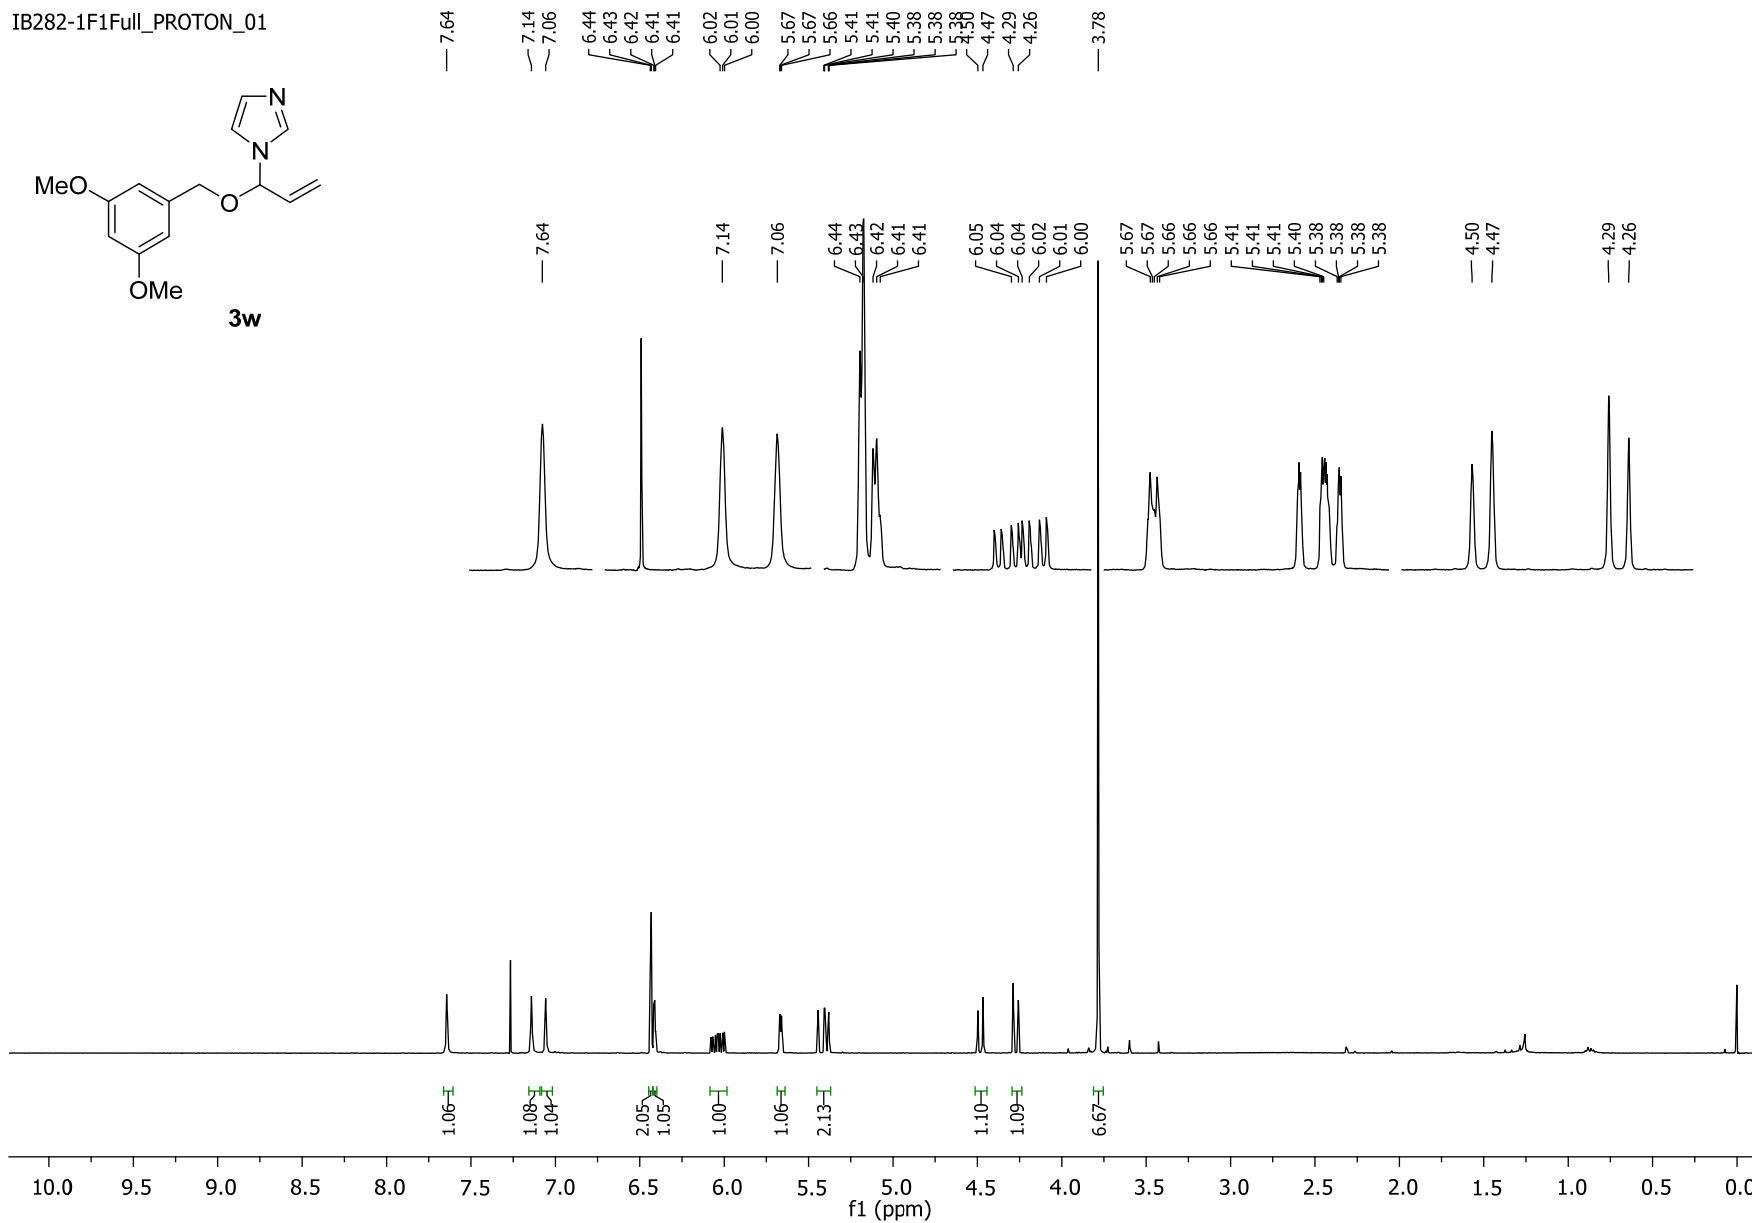

IB282-1F1Full\_CARBON\_01

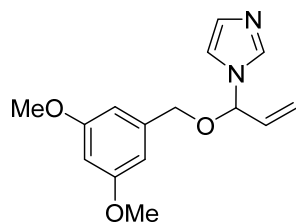

— 161.02

~ 138.54

~ 136.33

~ 134.10

~ 129.97

~ 119.03

~ 116.93

— 105.59

— 100.05

— 84.27

— 69.55

— 55.33

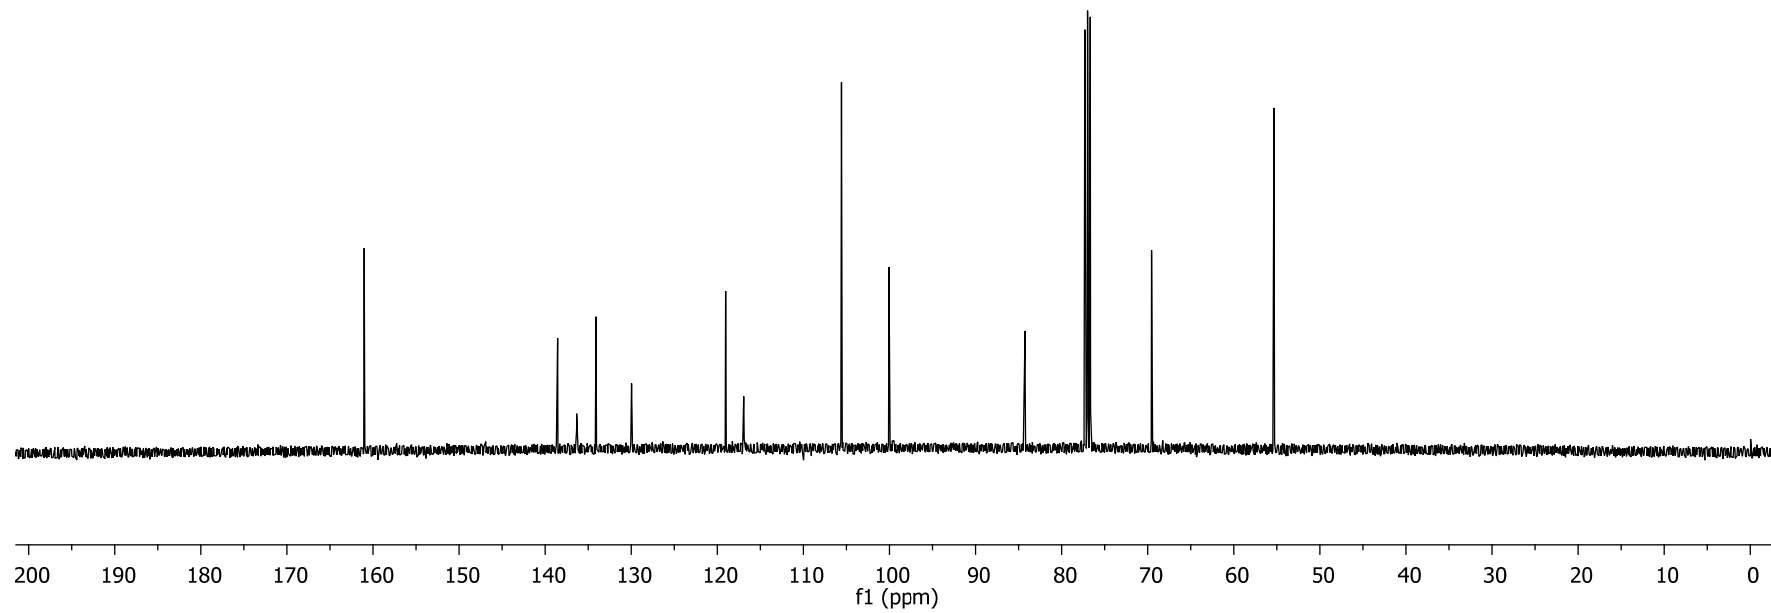

## Chiral HPLC chromatograms

### Detector A Ch1 254nm

Injection Volume : 10  $\mu$ L

Column: OD-H

Method: 98:2 *n*-heptane/ethanol

| Peak  | Ret. Time | Area      | Height  | Area %  | Height % |
|-------|-----------|-----------|---------|---------|----------|
| 1     | 24.177    | 52059802  | 3816742 | 51.744  | 59.718   |
| 2     | 26.802    | 48550515  | 2574533 | 48.256  | 40.282   |
| Total |           | 100610317 | 6391275 | 100.000 | 100.000  |

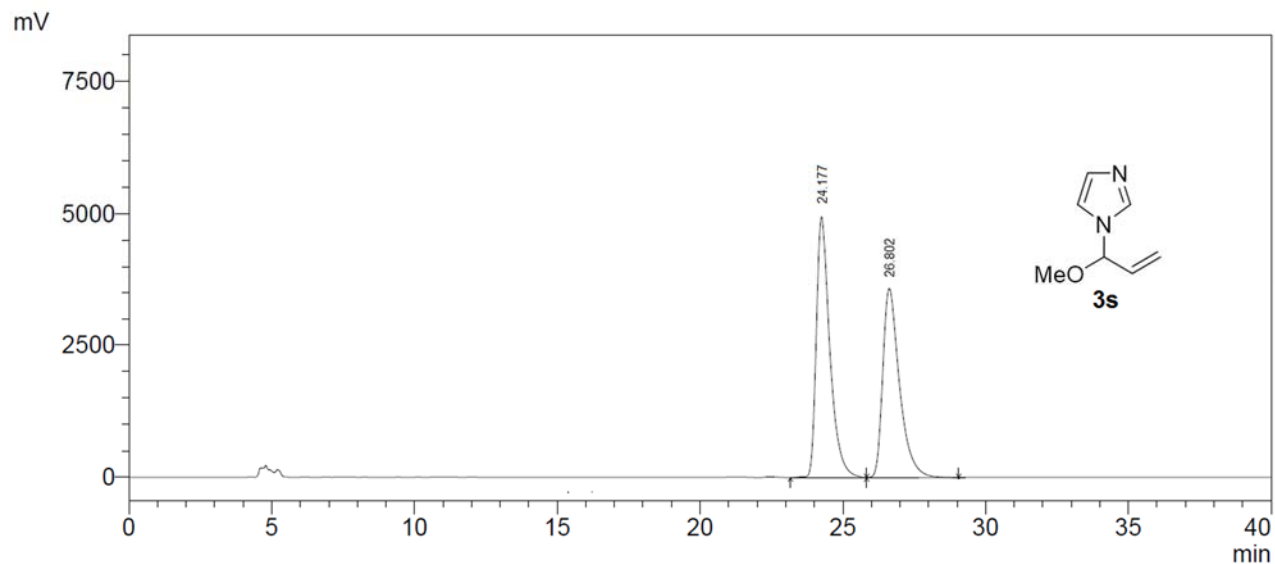

### Detector A Ch1 254nm

Injection Volume : 10  $\mu$ L

Column: OD-H

Method: 98:2 *n*-heptane/ethanol

| Peak  | Ret. Time | Area     | Height | Area %  | Height % |
|-------|-----------|----------|--------|---------|----------|
| 1     | 24.201    | 4812427  | 40504  | 9.033   | 8.368    |
| 2     | 26.823    | 48463640 | 443533 | 90.967  | 91.632   |
| Total |           | 53276067 | 484037 | 100.000 | 100.000  |

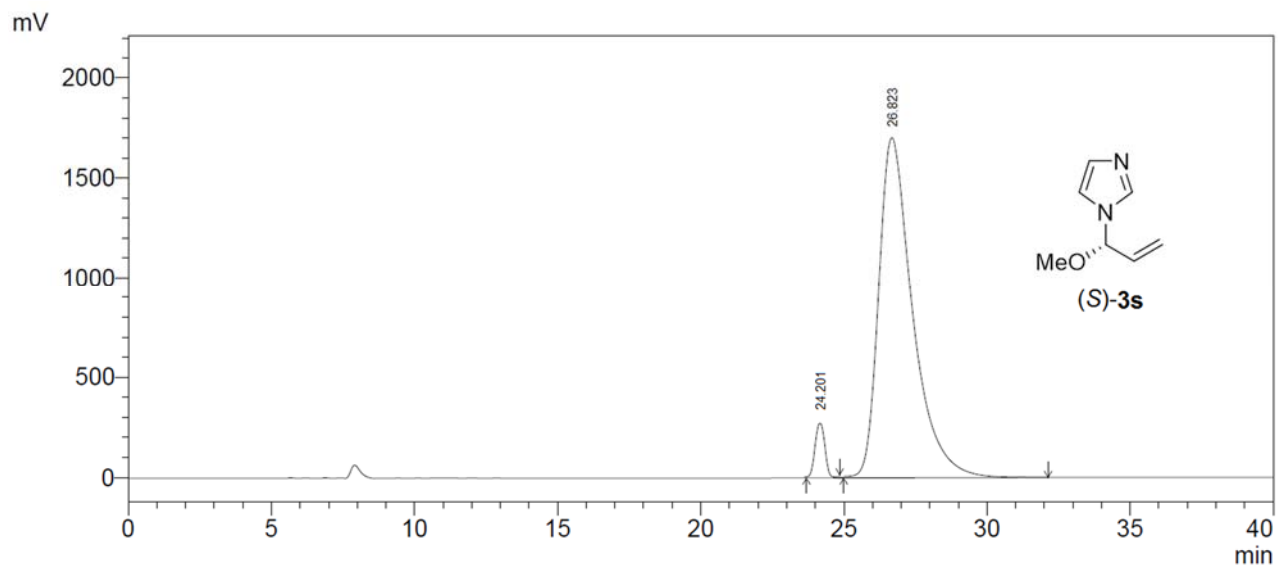

Detector A Ch1 254nm

Injection Volume : 10 uL

Column: OD-H

Method: 97:3 *n*-heptane/ethanol

| Peak  | Ret. Time | Area    | Height | Area %  | Height % |
|-------|-----------|---------|--------|---------|----------|
| 1     | 20.958    | 610857  | 282484 | 47.789  | 58.360   |
| 2     | 27.461    | 667381  | 201553 | 52.211  | 41.640   |
| Total |           | 1278238 | 484037 | 100.000 | 100.000  |

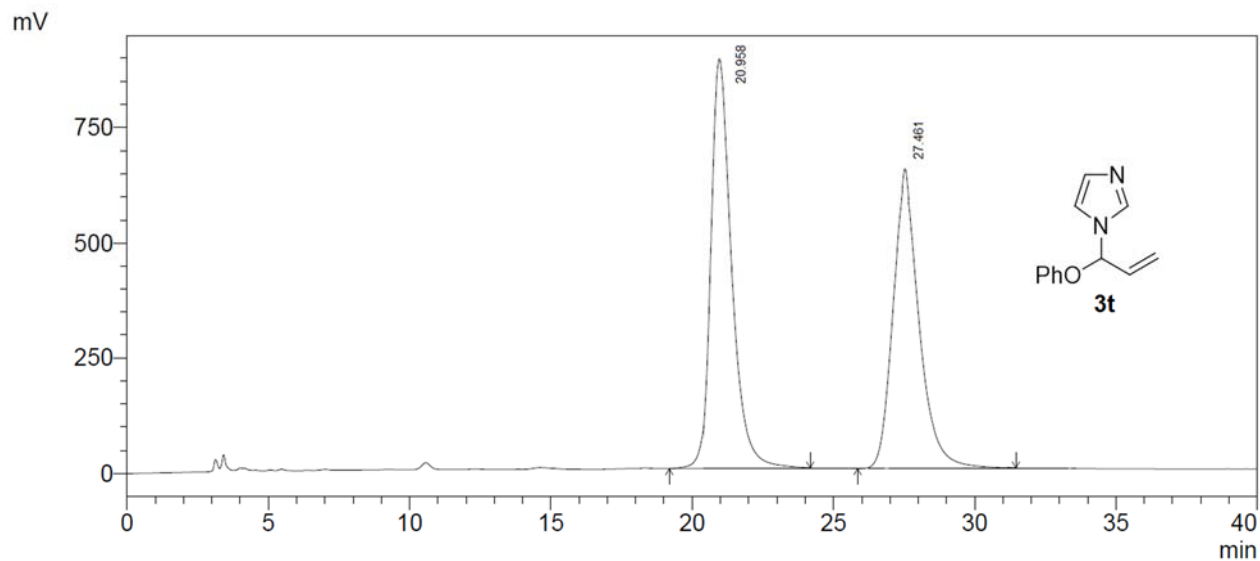

Detector A Ch1 254nm

Injection Volume : 10 uL

Column: OD-H

Method: 97:3 *n*-heptane/ethanol

| Peak  | Ret. Time | Area      | Height  | Area %  | Height % |
|-------|-----------|-----------|---------|---------|----------|
| 1     | 20.989    | 6123274   | 397268  | 5.218   | 5.009    |
| 2     | 27.478    | 111225781 | 7533818 | 94.782  | 94.991   |
| Total |           | 117349055 | 7931086 | 100.000 | 100.000  |

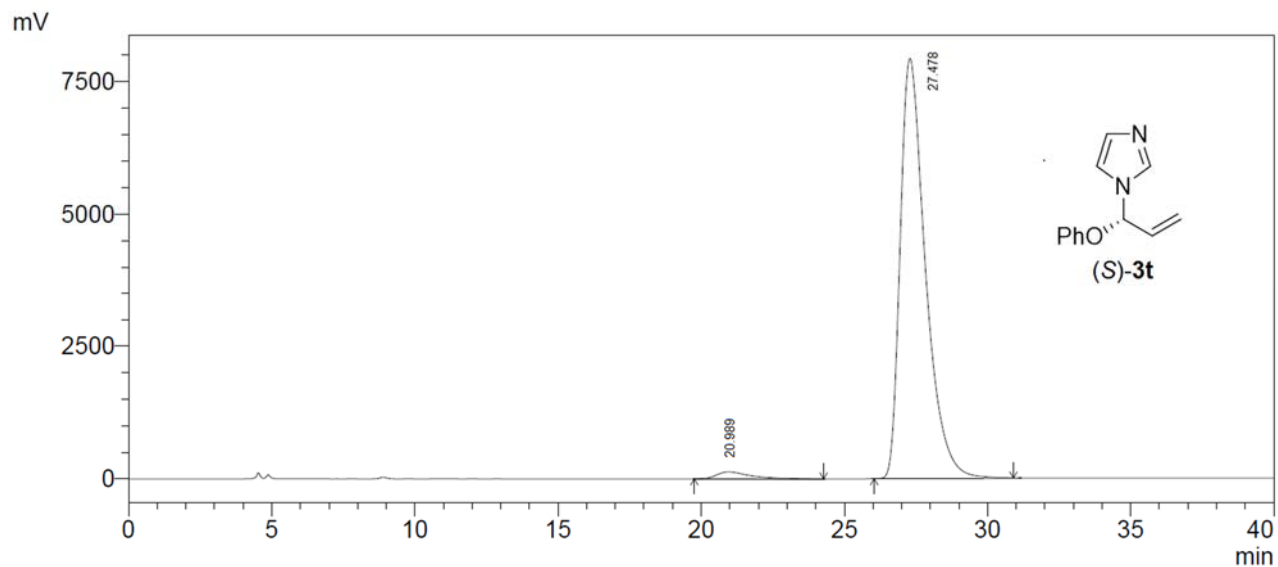

Detector A Ch1 254nm

Injection Volume : 10 uL

Column: OD-H

Method: 97:3 *n*-heptane/ethanol

| Peak  | Ret. Time | Area     | Height | Area %  | Height % |
|-------|-----------|----------|--------|---------|----------|
| 1     | 23.313    | 7214426  | 107874 | 52.048  | 54.764   |
| 2     | 28.595    | 6646667  | 89106  | 47.952  | 45.236   |
| Total |           | 13861093 | 196980 | 100.000 | 100.000  |

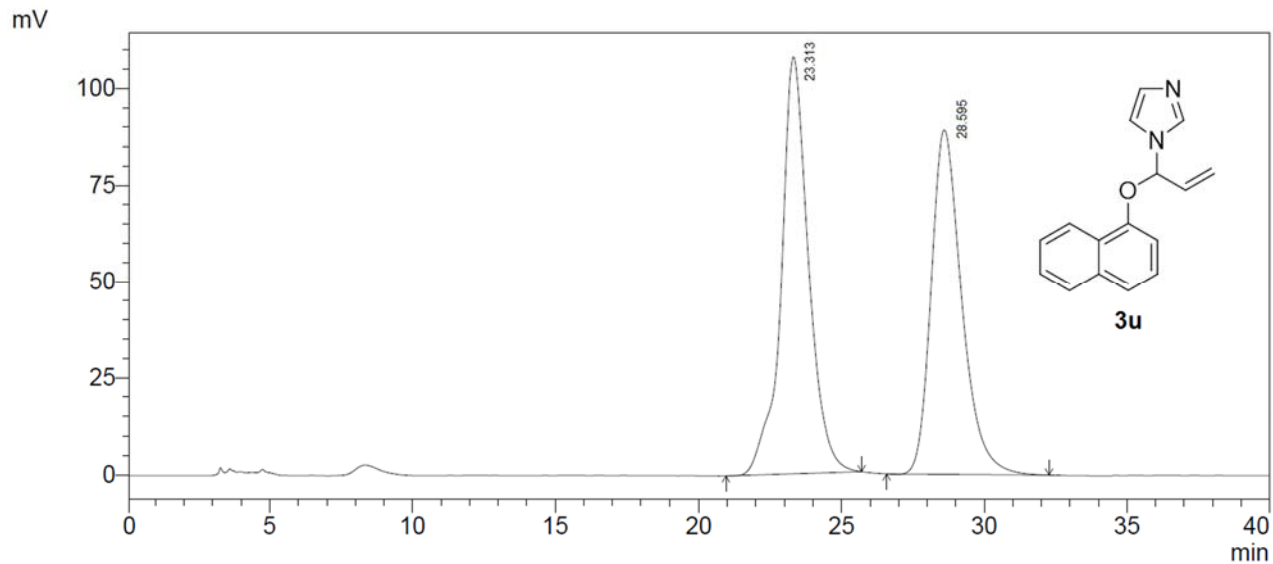

Detector A Ch1 254nm

Injection Volume : 10 uL

Column: OD-H

Method: 97:3 *n*-heptane/ethanol

| Peak  | Ret. Time | Area     | Height | Area %  | Height % |
|-------|-----------|----------|--------|---------|----------|
| 1     | 23.367    | 1492808  | 8104   | 3.788   | 2.987    |
| 2     | 28.622    | 37916075 | 263217 | 96.212  | 97.013   |
| Total |           | 39408883 | 271321 | 100.000 | 100.000  |

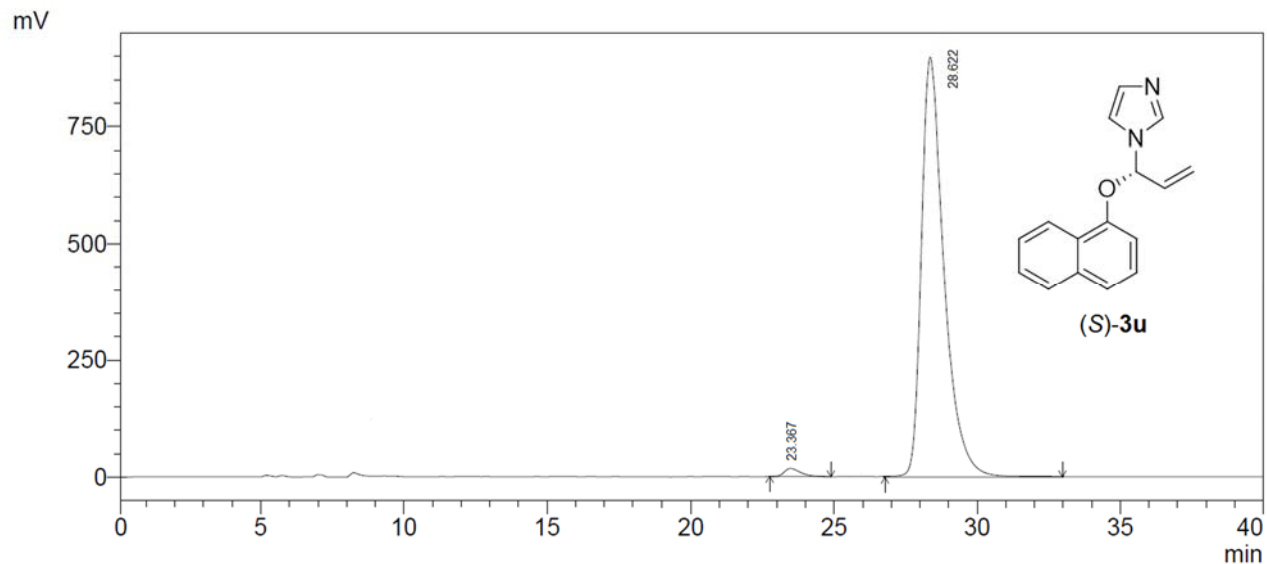



Detector A Ch1 254nm

Injection Volume : 10  $\mu$ L

Column: OD-H

Method: 97:3 *n*-heptane/ethanol

| Peak  | Ret. Time | Area      | Height  | Area %  | Height % |
|-------|-----------|-----------|---------|---------|----------|
| 1     | 19.971    | 56134369  | 4320908 | 49.985  | 57.988   |
| 2     | 22.899    | 56168059  | 3130475 | 50.015  | 42.012   |
| Total |           | 112302428 | 7451383 | 100.000 | 100.000  |

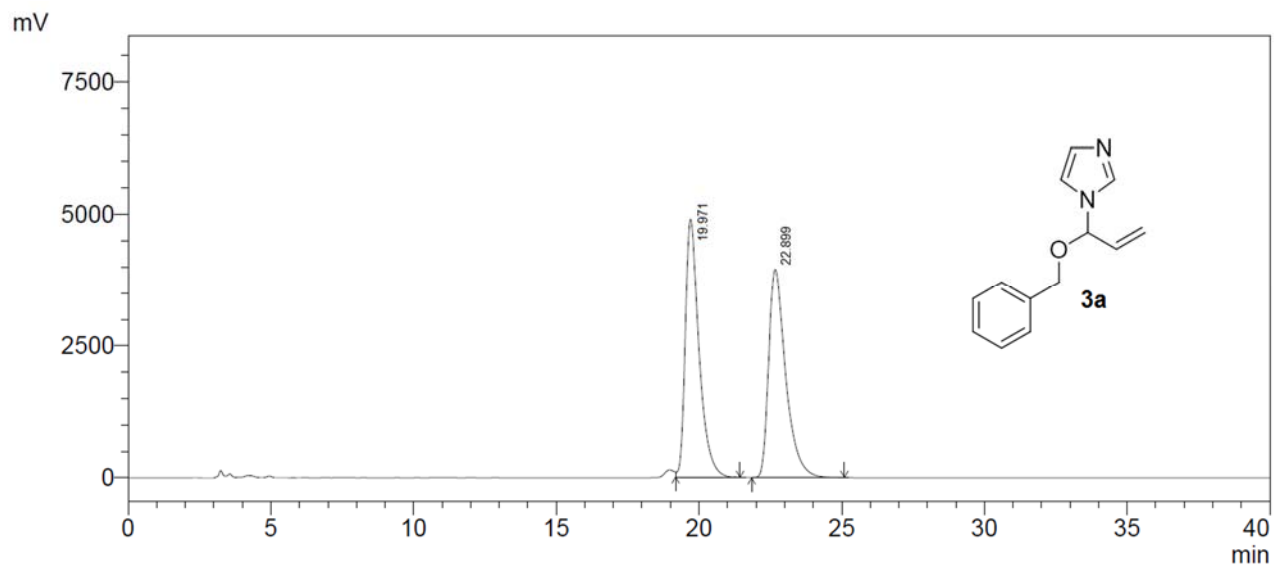

Detector A Ch1 254nm

Injection Volume : 10  $\mu$ L

Column: OD-H

Method: 97:3 *n*-heptane/ethanol

| Peak  | Ret. Time | Area      | Height  | Area %  | Height % |
|-------|-----------|-----------|---------|---------|----------|
| 1     | 19.953    | 5941785   | 347969  | 4.124   | 3.999    |
| 2     | 22.876    | 138136426 | 8353426 | 95.876  | 96.001   |
| Total |           | 144078211 | 8701395 | 100.000 | 100.000  |

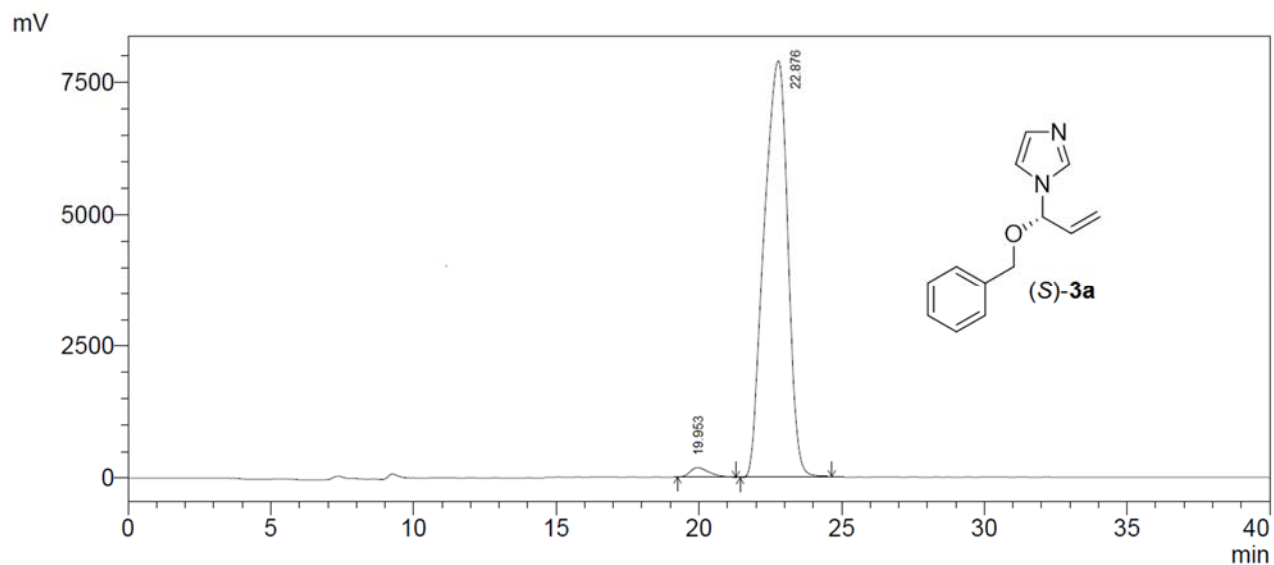

Detector A Ch1 254nm

Injection Volume : 10  $\mu$ L

Column: OD-H

Method: 97:3 *n*-heptane/ethanol

| Peak  | Ret. Time | Area     | Height  | Area %  | Height % |
|-------|-----------|----------|---------|---------|----------|
| 1     | 22.172    | 34384281 | 638868  | 49.605  | 58.355   |
| 2     | 27.468    | 34931559 | 455927  | 50.395  | 41.645   |
| Total |           | 69315840 | 1094795 | 100.000 | 100.000  |

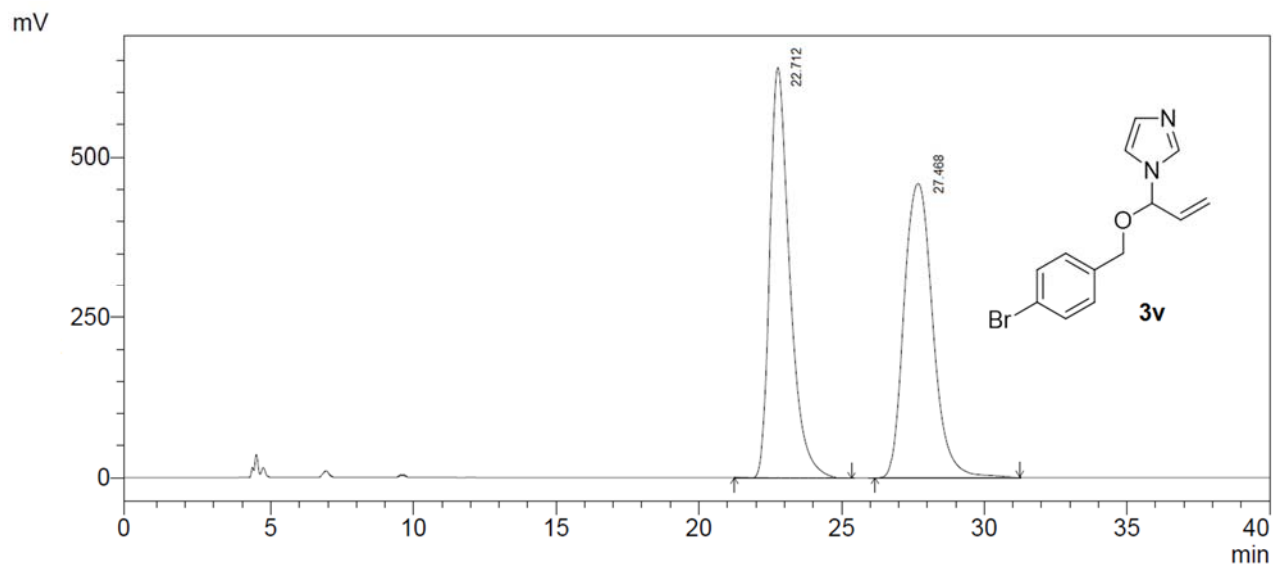

Detector A Ch1 254nm

Injection Volume : 10  $\mu$ L

Column: OD-H

Method: 97:3 *n*-heptane/ethanol

| Peak  | Ret. Time | Area     | Height | Area %  | Height % |
|-------|-----------|----------|--------|---------|----------|
| 1     | 22.208    | 2089828  | 28307  | 3.988   | 3.567    |
| 2     | 27.493    | 50313085 | 765294 | 96.012  | 96.433   |
| Total |           | 52402913 | 793602 | 100.000 | 100.000  |

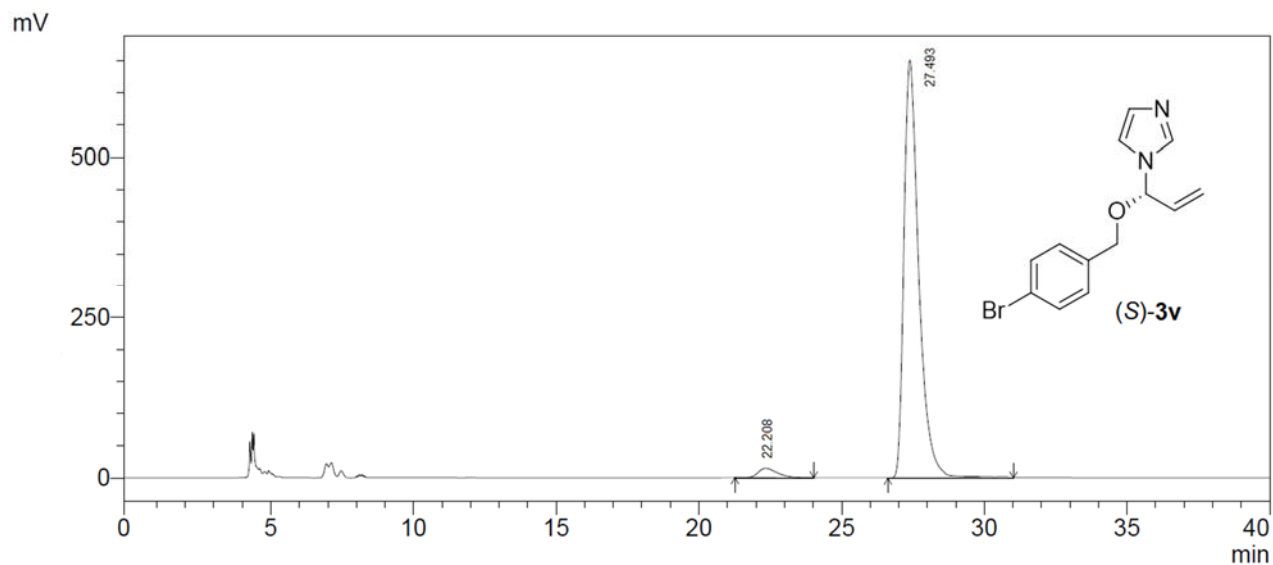

Detector A Ch1 254nm

Injection Volume : 10 uL

Column: OD-H

Method: 97:3 *n*-heptane/ethanol

| Peak  | Ret. Time | Area     | Height | Area %  | Height % |
|-------|-----------|----------|--------|---------|----------|
| 1     | 30.184    | 25135092 | 261437 | 50.233  | 59.122   |
| 2     | 35.034    | 24901920 | 180762 | 49.767  | 40.878   |
| Total |           | 50037012 | 442199 | 100.000 | 100.000  |

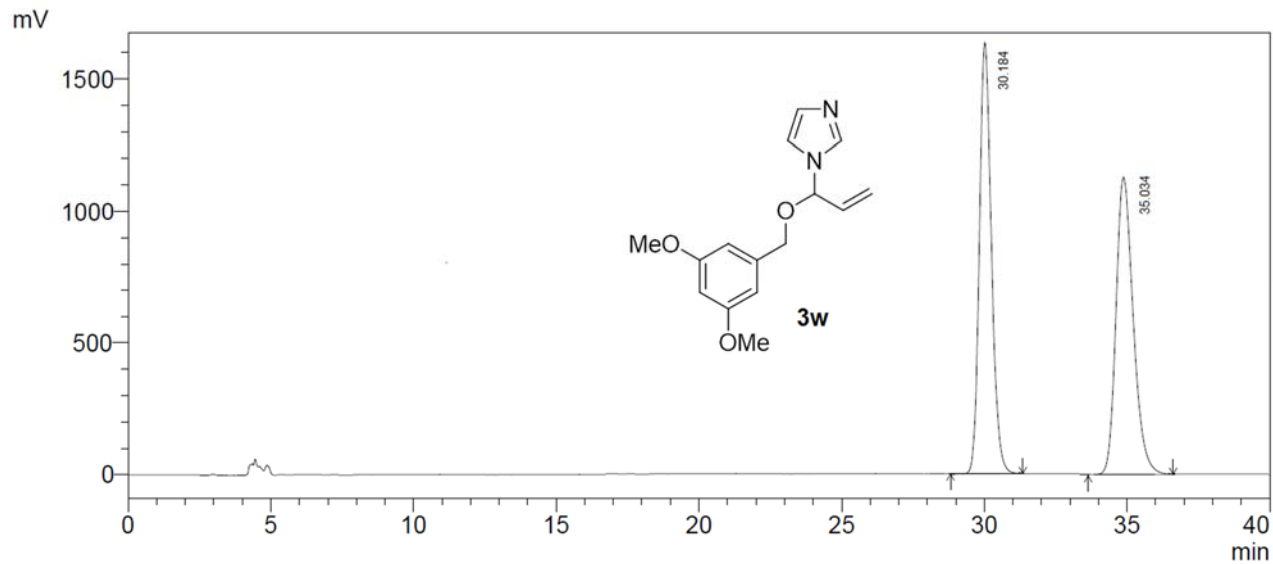

Detector A Ch1 254nm

Injection Volume : 10 uL

Column: OD-H

Method: 97:3 *n*-heptane/ethanol

| Peak  | Ret. Time | Area     | Height | Area %  | Height % |
|-------|-----------|----------|--------|---------|----------|
| 1     | 30.201    | 2003561  | 14718  | 3.270   | 3.039    |
| 2     | 35.069    | 59267423 | 469588 | 96.730  | 96.961   |
| Total |           | 61270984 | 484306 | 100.000 | 100.000  |

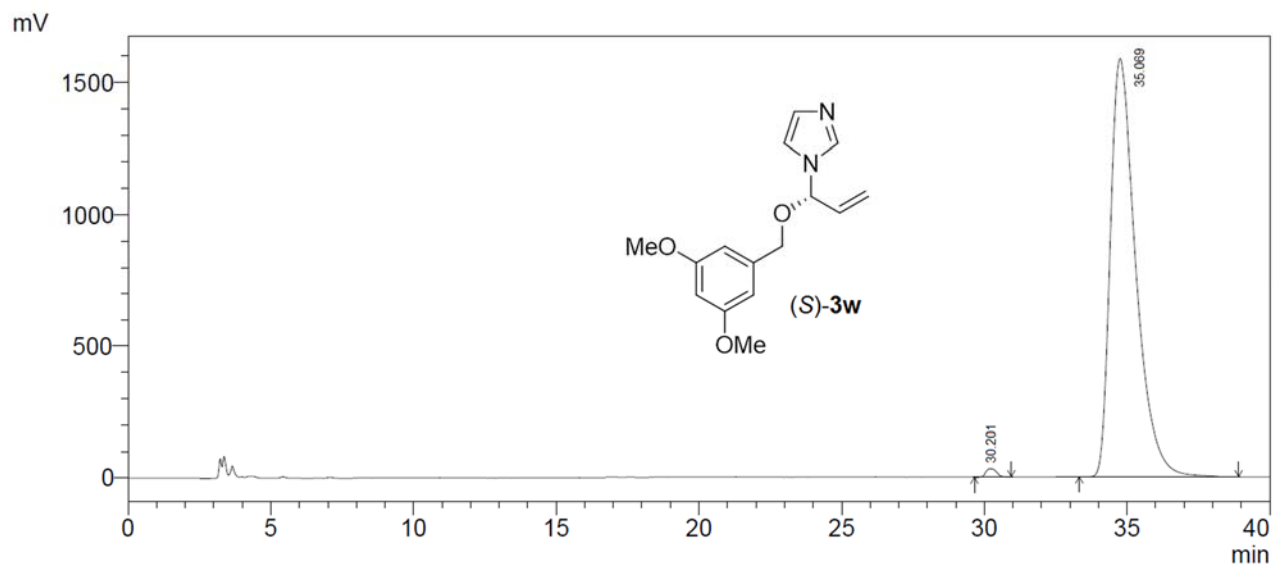

Detector A Ch1 254nm

Injection Volume : 10  $\mu$ L

Column: Cellulose-1

Method: 70:30 *n*-heptane/lpA

| Peak  | Ret. Time | Area     | Height  | Area %  | Height % |
|-------|-----------|----------|---------|---------|----------|
| 1     | 15.801    | 22800666 | 1945268 | 49.435  | 51.048   |
| 2     | 16.487    | 23321851 | 1865397 | 50.565  | 48.952   |
| Total |           | 46122517 | 3810665 | 100.000 | 100.000  |

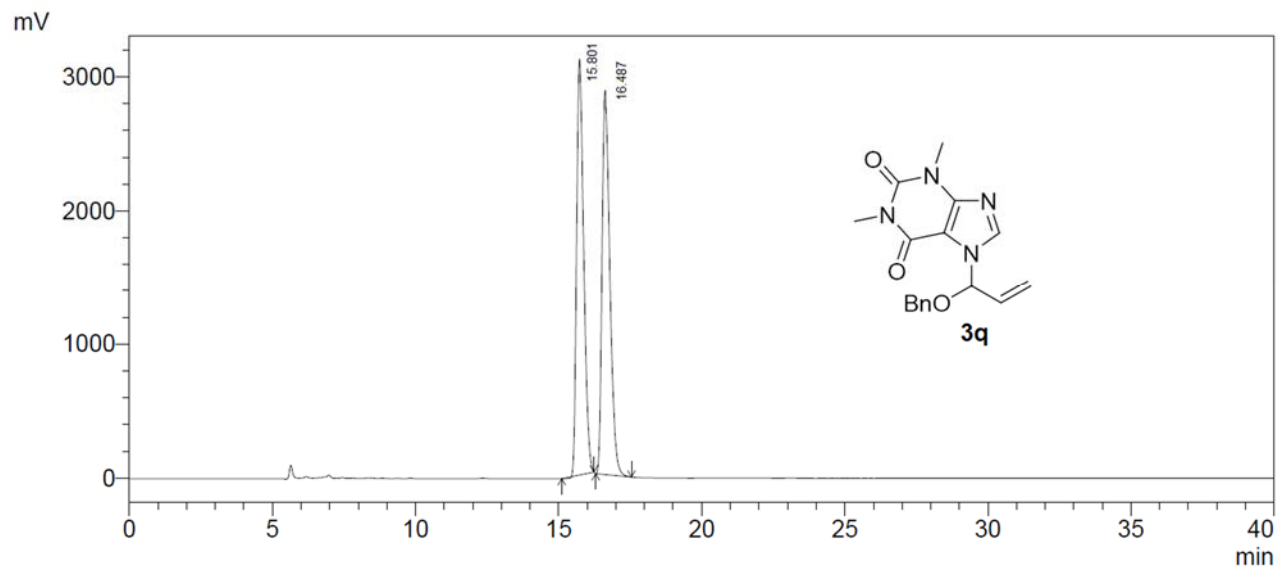

Detector A Ch1 254nm

Injection Volume : 10  $\mu$ L

Column: Cellulose-1

Method: 70:30 *n*-heptane/lpA

| Peak  | Ret. Time | Area      | Height  | Area %  | Height % |
|-------|-----------|-----------|---------|---------|----------|
| 1     | 15.832    | 4912705   | 326088  | 3.640   | 3.957    |
| 2     | 16.518    | 130040912 | 7914178 | 96.360  | 96.043   |
| Total |           | 134953617 | 8240266 | 100.000 | 100.000  |

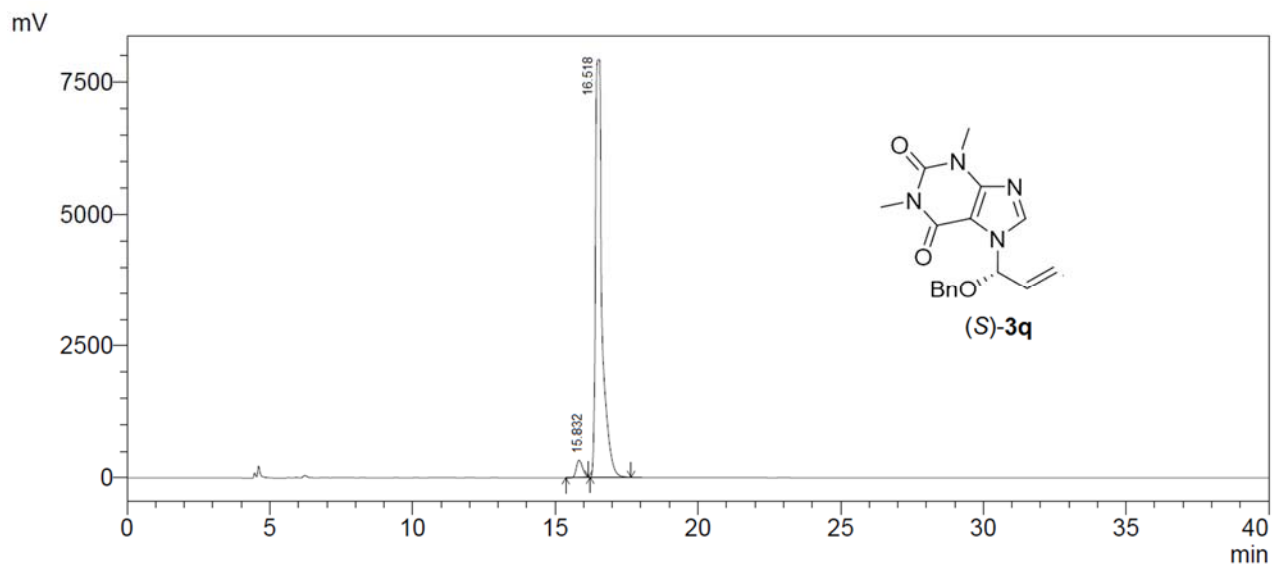

## CD and HT chromatograms

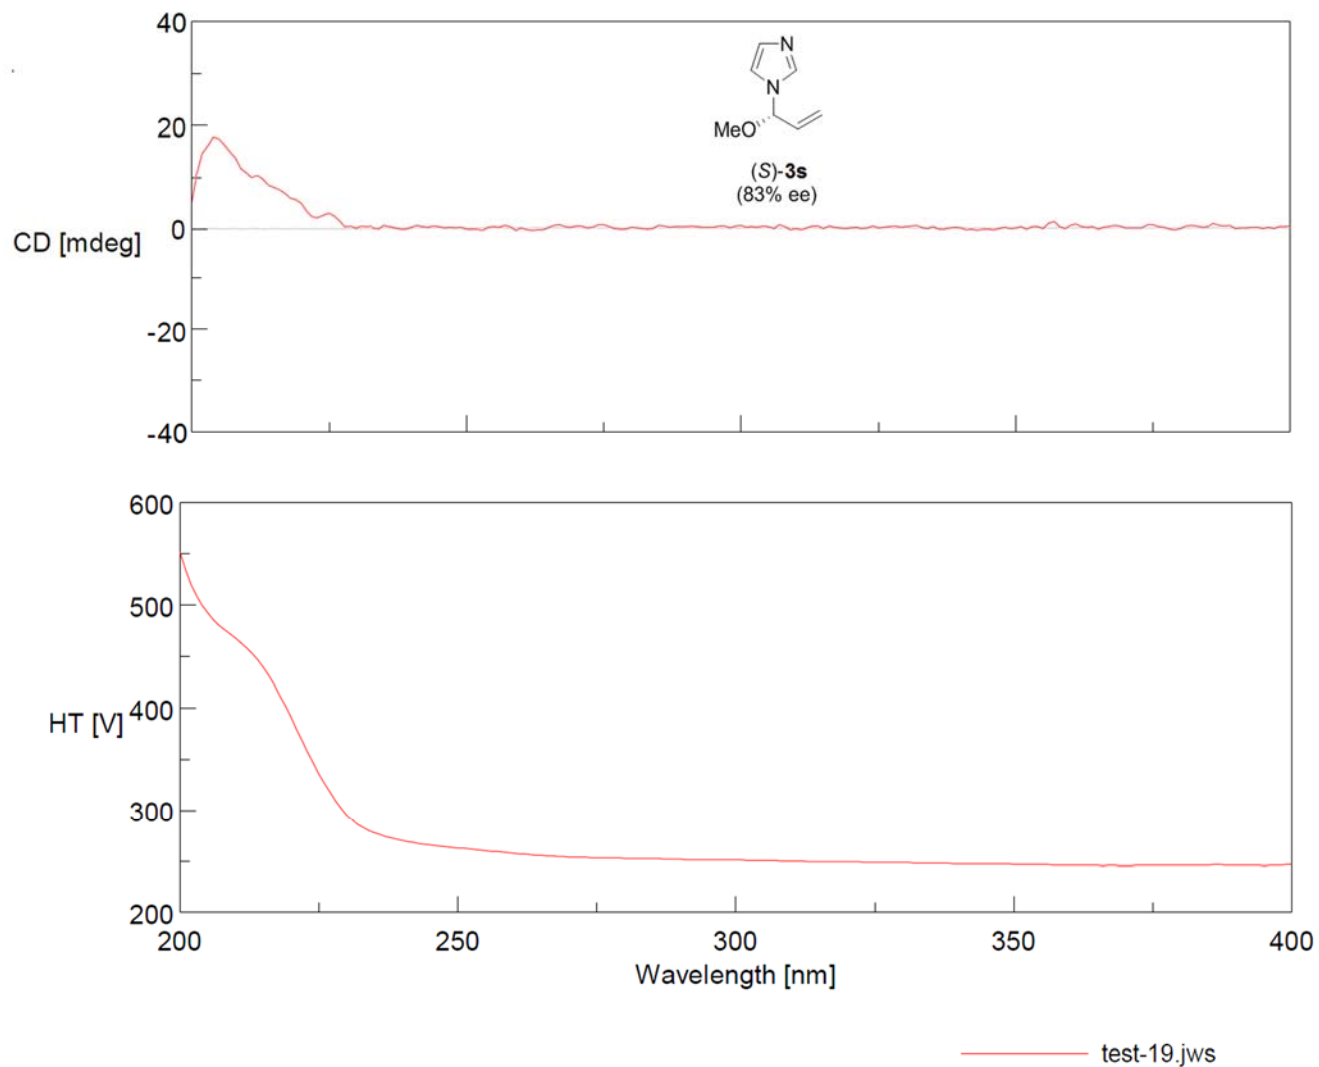

**Photometric Mode:** CD, HT

**Measure Range:** 400 - 200 nm

**Concentration:** 0.15 mg/ml

**D.I.T.:** 1 sec

**Bandwidth:** 1.00 nm

**Solvent:** Methanol

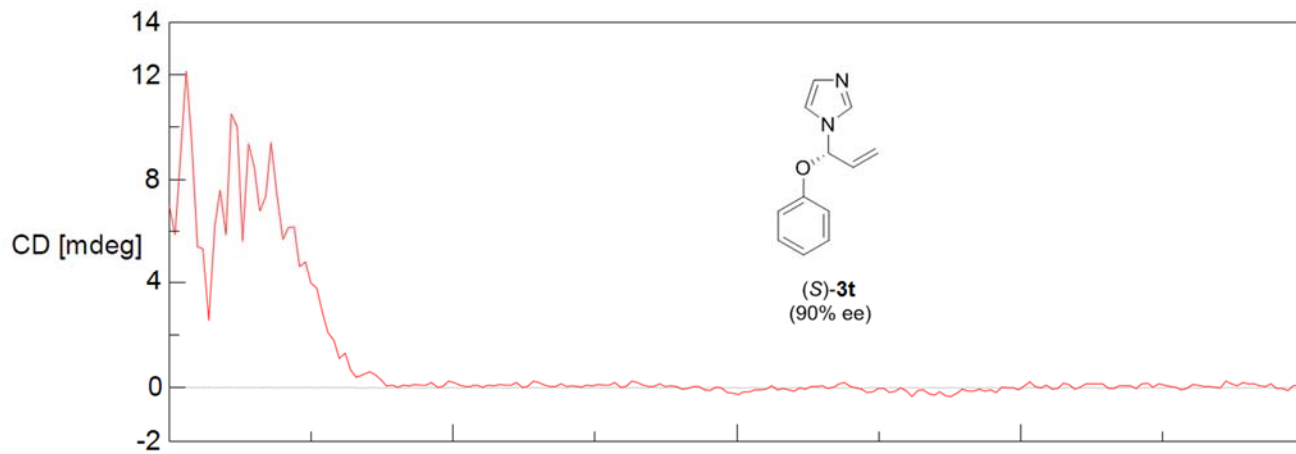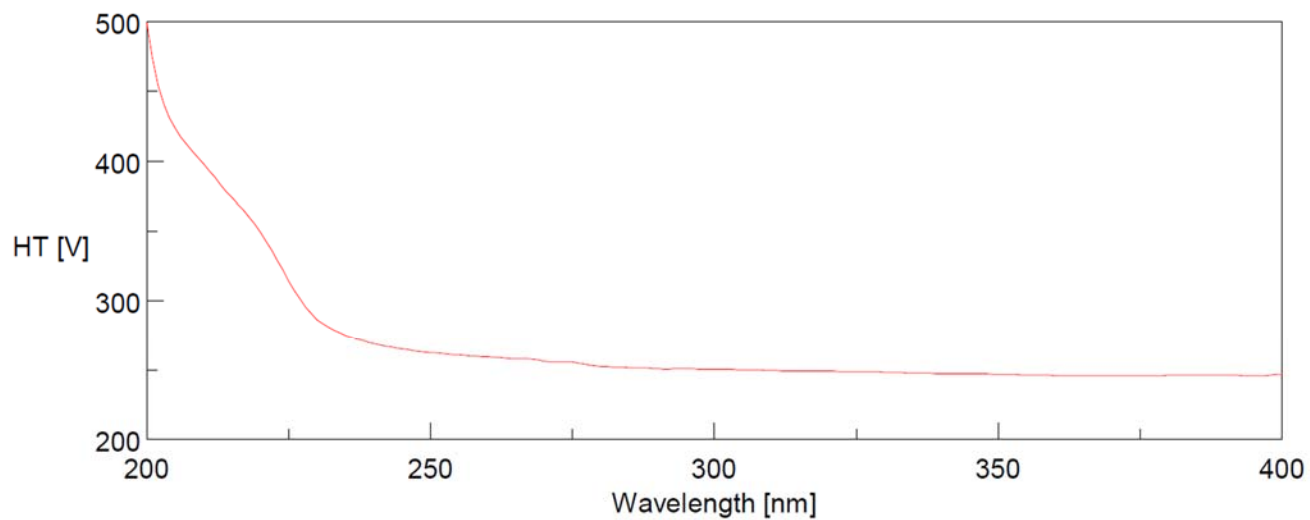

test-14.jws

**Photometric Mode:** CD, HT

**Measure Range:** 400 - 200 nm

**Concentration:** 0.05 mg/ml

**D.I.T.:** 1 sec

**Bandwidth:** 1.00 nm

**Solvent:** Methanol

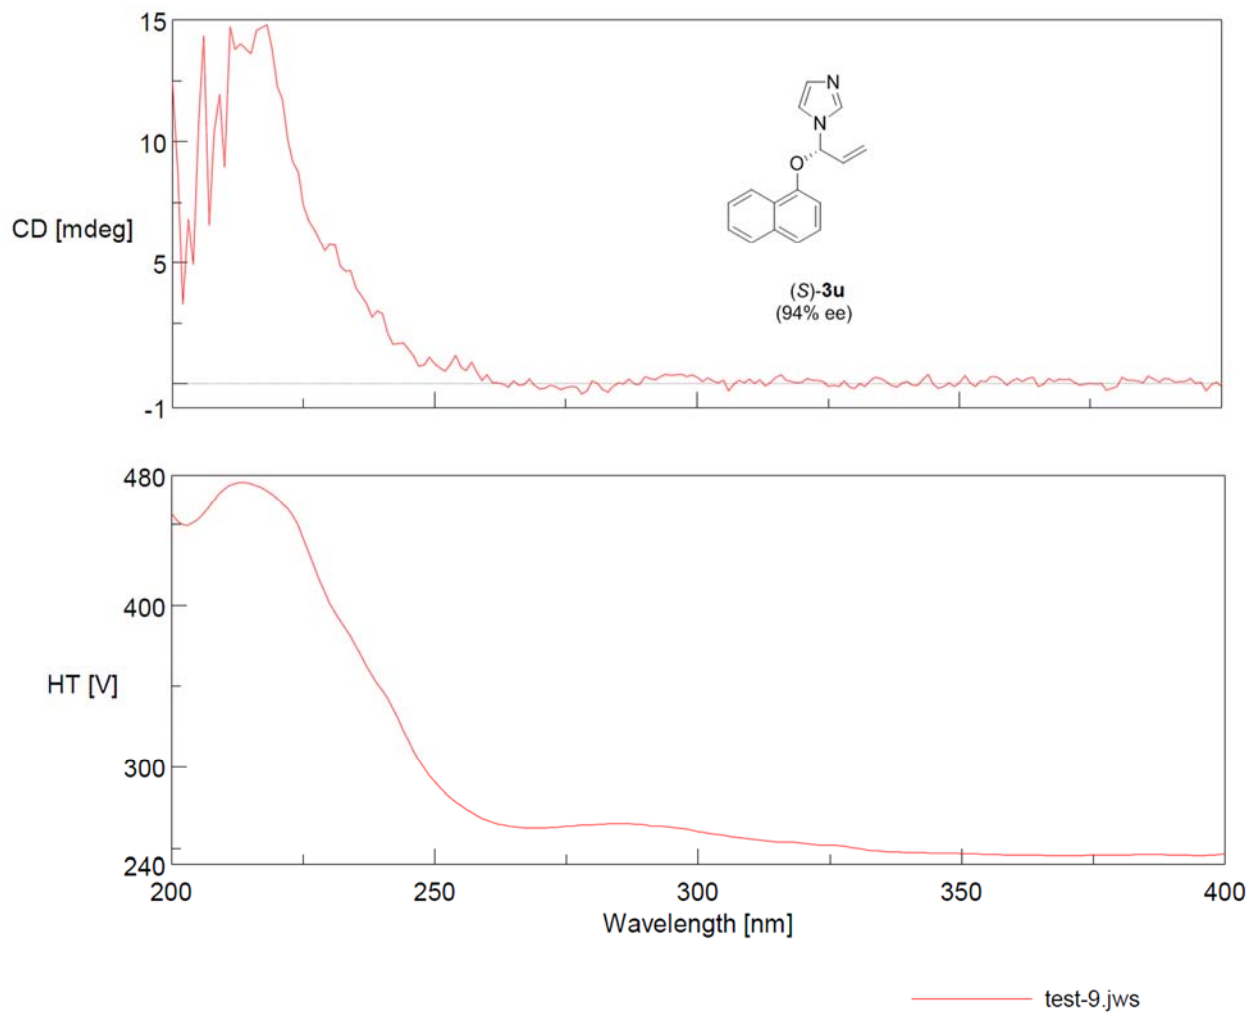

**Photometric Mode:** CD, HT

**Measure Range:** 400 - 200 nm

**Concentration:** 0.05 mg/ml

**D.I.T.:** 1 sec

**Bandwidth:** 1.00 nm

**Solvent:** Methanol

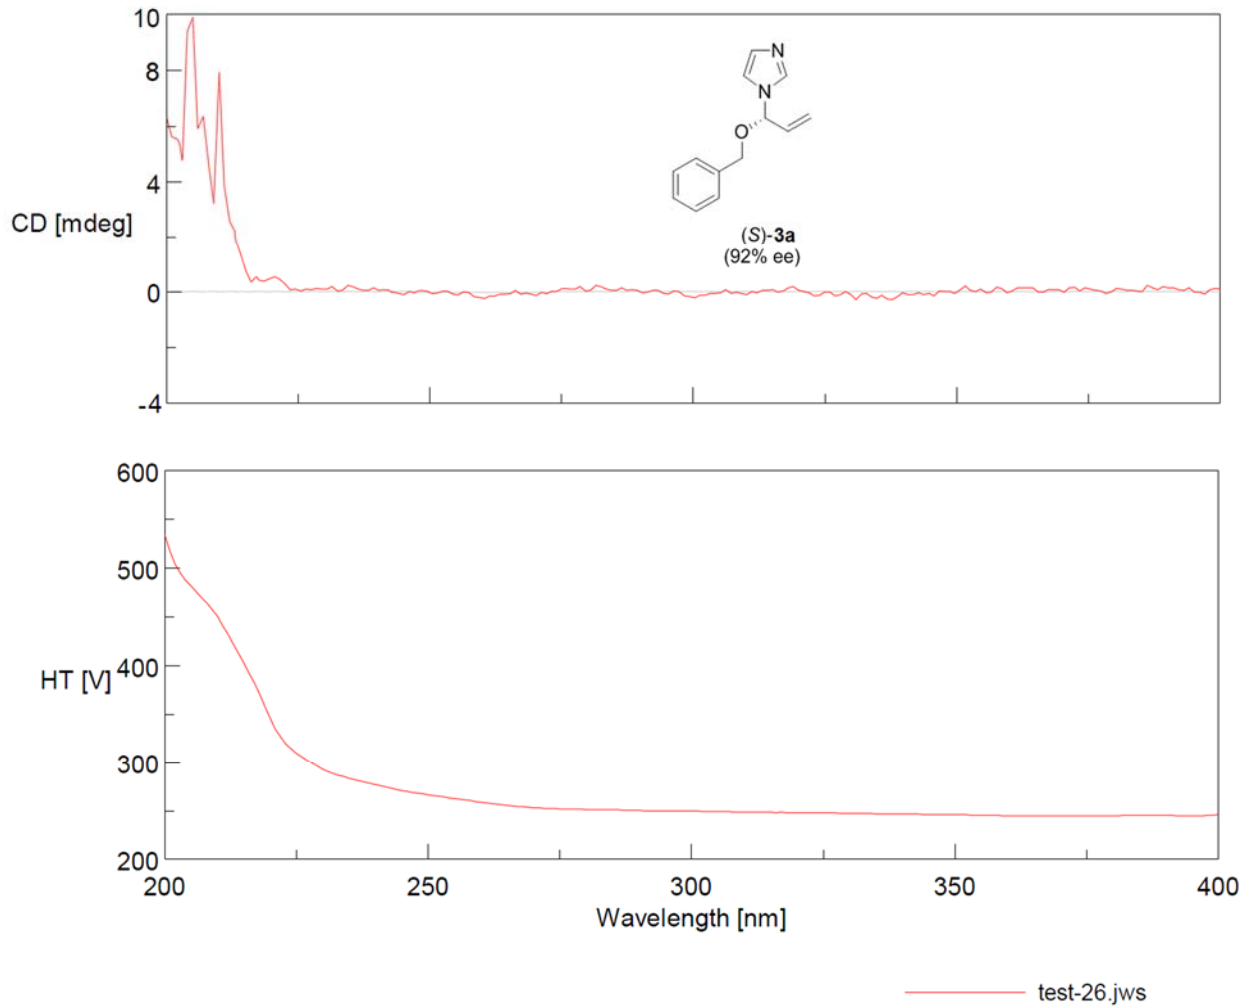

**Photometric Mode:** CD, HT

**Measure Range:** 400 - 200 nm

**Concentration:** 0.05 mg/ml

**D.I.T.:** 1 sec

**Bandwidth:** 1.00 nm

**Solvent:** Methanol



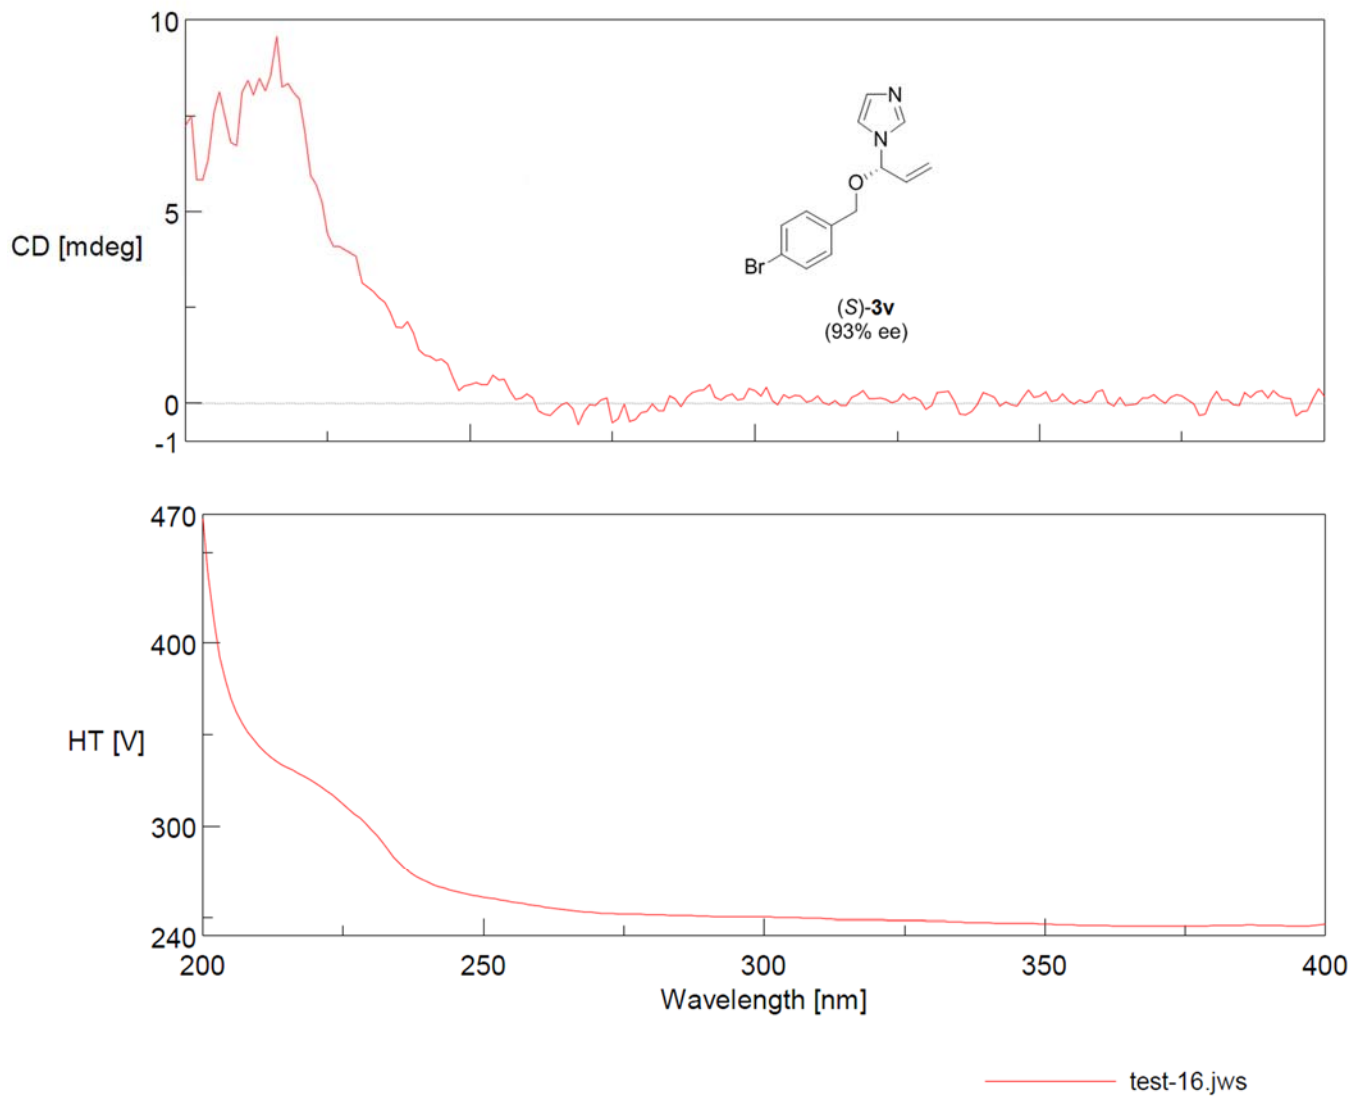

**Photometric Mode:** CD, HT

**Measure Range:** 400 - 200 nm

**Concentration:** 0.05 mg/ml

**D.I.T.:** 1 sec

**Bandwidth:** 1.00 nm

**Solvent:** Methanol

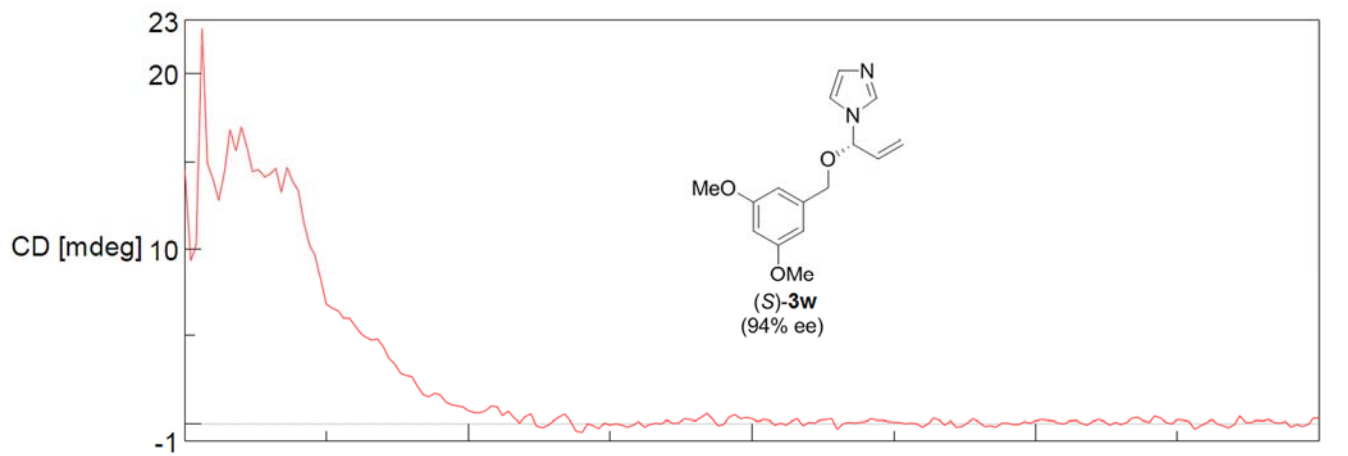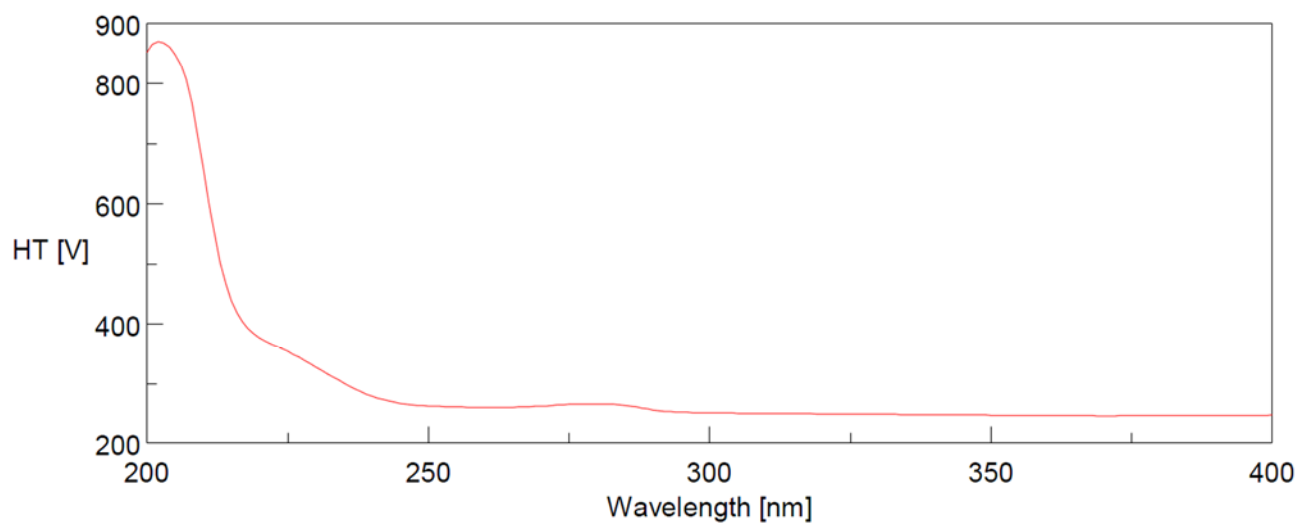

test-11.jws

**Photometric Mode:** CD, HT

**Measure Range:** 400 - 200 nm

**Concentration:** 0.12 mg/ml

**D.I.T.:** 1 sec

**Bandwidth:** 1.00 nm

**Solvent:** Methanol

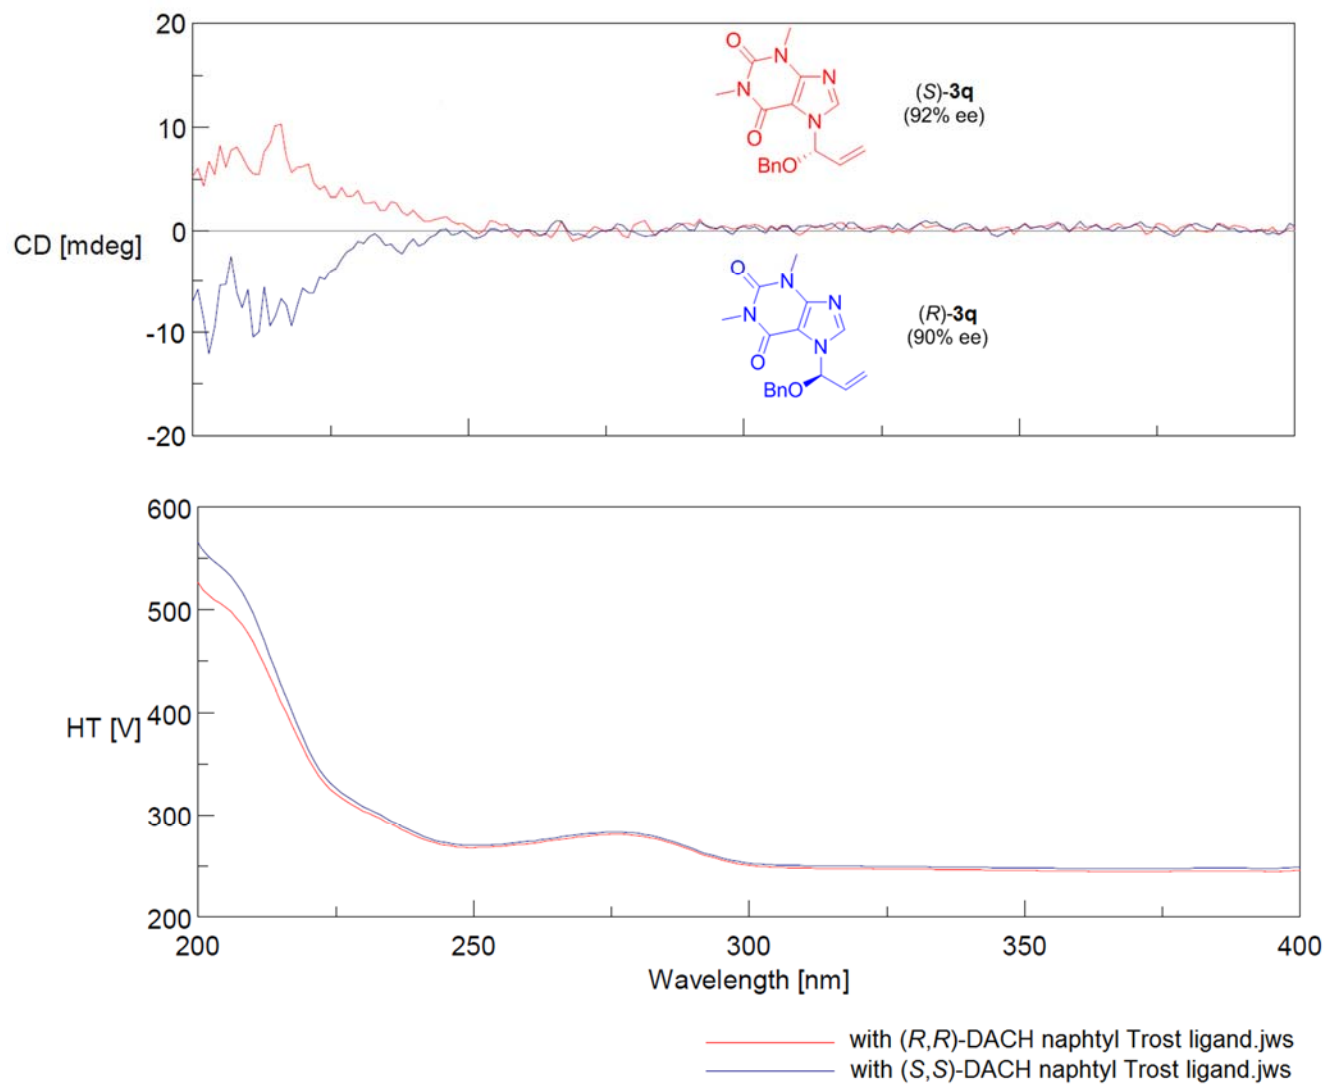

**Photometric Mode:** CD, HT  
**Measure Range:** 400 - 200 nm  
**Concentration:** 0.07 mg/ml  
**D.I.T.:** 1 sec  
**Bandwidth:** 1.00 nm  
**Solvent:** Methanol

Crystal structure of (S)-3q

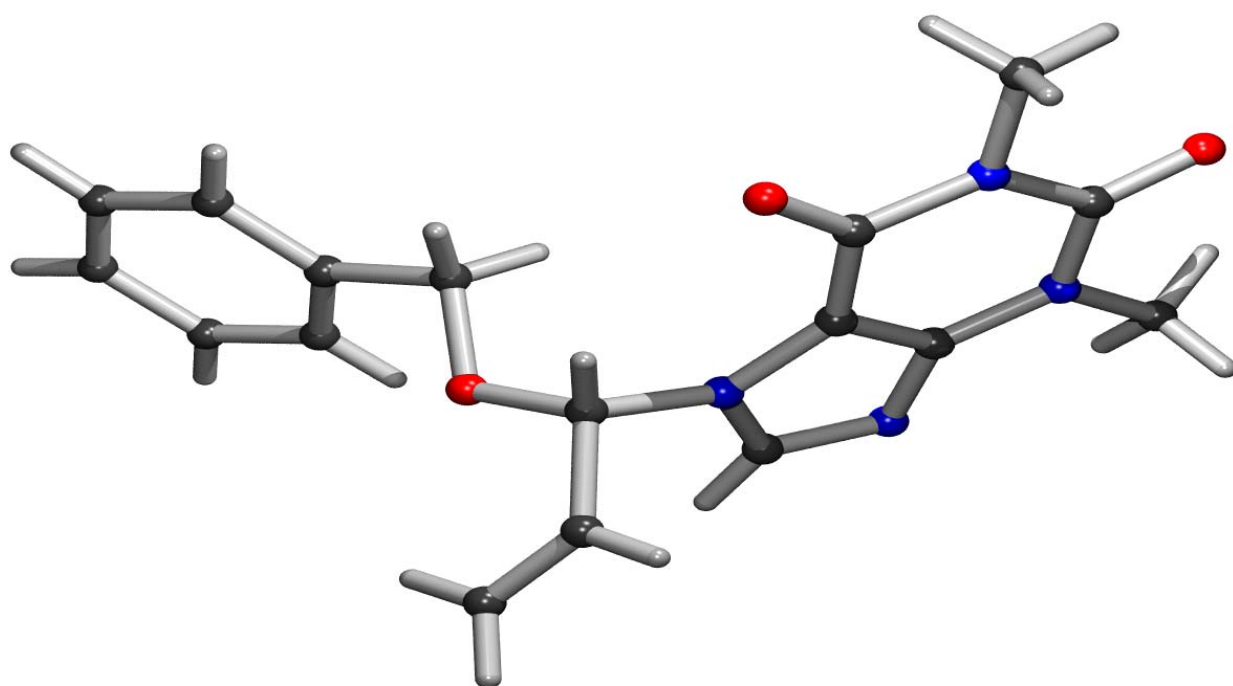

Supplement: ol7b01826_si_001.pdf [file ol7b01826_si_001.pdf]
